# Supplementary material for: A Dynamic View of Domain-Motif Interactions
Source: PLoS Comput Biol. 2012 Jan 12;8(1):e1002341. doi: 10.1371/journal.pcbi.1002341 (PMC3257277; doi:10.1371/journal.pcbi.1002341)
Supplement: Dataset S1 — Database of interaction-regulation units for Homo sapiens . (XLS) [file pcbi.1002341.s010.xls]

## Sheet: Human modules database
Dataset S1: Database of interaction-regulation units for Homo sapiens.
This table details all modules yielded from integrating the domain-motif interactions and the phosphorylation sites data. The second column indicates the relative position of the phosphorylation (within or near the motif). Note that the same motif may appear in several entries (e.g. two intra-motif phosphorylation events are given separately). The sixth and ninth columns indicate the evidence lev…
Swiss-Prot ID	Module type	motif start	motif end	domain type	domain-motif interaction evidence	interaction reference	phosphortylation site	phosphorylation site evidence	phosphorylation site reference
3BP1_HUMAN	NEAR	616	625	SH3	LTP	[1]	626	HTP	[8]
3BP2_HUMAN	INTRA	175	192	SH2	LTP	[5]	183	LTP	[14,13,15]
3BP2_HUMAN	NEAR	175	192	SH2	LTP	[5]	174	LTP	[14,13,15]
3BP2_HUMAN	INTRA	177	193	SH2	LTP	[11]	183	LTP	[14,13,15]
3BP2_HUMAN	NEAR	177	193	SH2	LTP	[11]	174	LTP	[14,13,15]
3BP2_HUMAN	NEAR	201	207	SH3	LTP	[2]	183	LTP	[14,13,15]
3BP2_HUMAN	NEAR	201	207	SH3	LTP	[2]	225	LTP	[14,15]
ABL1_HUMAN	INTRA	606	618	SH3	HTP	[1]	613	HTP	[15,8]
ABL1_HUMAN	INTRA	606	618	SH3	HTP	[1]	618	HTP	[17,15]
ABL1_HUMAN	NEAR	606	618	SH3	HTP	[1]	620	HTP	[15,8]
ABL2_HUMAN	NEAR	569	582	SH3	HTP	[1]	568	HTP	[15]
ABL2_HUMAN	NEAR	569	582	SH3	HTP	[1]	599	HTP	[17,15]
ABL2_HUMAN	NEAR	569	582	SH3	HTP	[1]	602	HTP	[17,15,8]
ABL2_HUMAN	INTRA	617	630	SH3	HTP	[1]	620	mHTP	[17,15,8]
ABL2_HUMAN	NEAR	617	630	SH3	HTP	[1]	631	mHTP	[14,13,17,15,16,8]
ABL2_HUMAN	NEAR	617	630	SH3	HTP	[1]	633	mHTP	[13,17,15,16,8]
ABL2_HUMAN	INTRA	617	630	SH3	HTP	[1]	617	HTP	[17,15]
ABL2_HUMAN	INTRA	617	630	SH3	HTP	[1]	618	HTP	[17,15]
ABL2_HUMAN	NEAR	617	630	SH3	HTP	[1]	599	HTP	[17,15]
ABL2_HUMAN	NEAR	617	630	SH3	HTP	[1]	602	HTP	[17,15,8]
ABL2_HUMAN	NEAR	617	630	SH3	HTP	[1]	634	HTP	[13,16]
ABL2_HUMAN	NEAR	657	669	SH3	HTP	[1]	655	HTP	[15,8]
ABL2_HUMAN	NEAR	657	669	SH3	HTP	[1]	671	HTP	[17,15,8]
ACAP1_HUMAN	NEAR	536	549	SH3	HTP	[1]	554	LTP	[14,15,8]
ACK1_HUMAN	NEAR	737	748	SH3	HTP	[1]	724	HTP	[17,15]
ACK1_HUMAN	NEAR	737	748	SH3	HTP	[1]	728	HTP	[17,15]
ACK1_HUMAN	NEAR	737	748	SH3	HTP	[1]	730	HTP	[17]
ACK1_HUMAN	NEAR	929	940	SH3	HTP	[1]	925	HTP	[15]
ADA17_HUMAN	INTRA	814	824	PDZ	LTP	[1]	819	LTP	[14,13,15,18,8]
ADA22_HUMAN	NEAR	877	891	SH3	LTP	[1]	857	LTP	[15]
ADA22_HUMAN	INTRA	877	891	SH3	LTP	[1]	882	HTP	[15]
ADA22_HUMAN	NEAR	877	891	SH3	LTP	[1]	869	HTP	[8]
ADA22_HUMAN	NEAR	877	891	SH3	LTP	[1]	870	HTP	[8]
ADNP_HUMAN	NEAR	583	596	SH3	HTP	[1]	607	HTP	[15]
ADNP_HUMAN	NEAR	583	596	SH3	HTP	[1]	608	HTP	[15]
ADRB2_HUMAN	INTRA	342	359	SH2	LTP	[5]	345	LTP	[14,13,15,18,8]
ADRB2_HUMAN	INTRA	342	359	SH2	LTP	[5]	346	LTP	[14,13,15,18,8]
ADRB2_HUMAN	INTRA	342	359	SH2	LTP	[5]	350	LTP	[13]
ADRB2_HUMAN	INTRA	342	359	SH2	LTP	[5]	354	LTP	[13]
ADRB2_HUMAN	INTRA	342	359	SH2	LTP	[5]	355	LTP	[14,15,8]
ADRB2_HUMAN	INTRA	342	359	SH2	LTP	[5]	356	LTP	[14,15,8]
ADRB2_HUMAN	NEAR	342	359	SH2	LTP	[5]	326	LTP	[14,13,15]
ADRB2_HUMAN	NEAR	342	359	SH2	LTP	[5]	360	LTP	[15]
ADRB2_HUMAN	NEAR	342	359	SH2	LTP	[5]	364	LTP	[13,15]
ADRB2_HUMAN	INTRA	403	413	PDZ	LTP	[3]	407	LTP	[14,13,18]
ADRB2_HUMAN	INTRA	403	413	PDZ	LTP	[3]	411	LTP	[14,13,15,18]
ADRB2_HUMAN	NEAR	403	413	PDZ	LTP	[3]	384	LTP	[14,13,15,18]
ADRB2_HUMAN	NEAR	403	413	PDZ	LTP	[3]	393	LTP	[14,13,15]
ADRB2_HUMAN	NEAR	403	413	PDZ	LTP	[3]	396	LTP	[14,13]
ADRB2_HUMAN	NEAR	403	413	PDZ	LTP	[3]	401	LTP	[14,13,18]
AFAP1_HUMAN	NEAR	62	73	SH3	LTP	[7]	93	LTP	[15]
AGTR1_HUMAN	INTRA	311	328	SH2	LTP	[5]	319	LTP	[14,13,15]
AGTR1_HUMAN	NEAR	311	328	SH2	LTP	[5]	302	LTP	[13]
AGTR1_HUMAN	NEAR	311	328	SH2	LTP	[5]	331	LTP	[15]
AGTR1_HUMAN	NEAR	311	328	SH2	LTP	[5]	332	LTP	[15]
AGTR1_HUMAN	NEAR	311	328	SH2	LTP	[5]	335	LTP	[15]
AGTR1_HUMAN	NEAR	311	328	SH2	LTP	[5]	336	LTP	[15]
AGTR1_HUMAN	NEAR	311	328	SH2	LTP	[5]	338	LTP	[15]
AGTR1_HUMAN	NEAR	311	328	SH2	LTP	[5]	348	LTP	[15]
ANK2_HUMAN	NEAR	1781	1793	SH3	HTP	[1]	1806	HTP	[16]
ANT3_HUMAN	NEAR	42	54	SH3	HTP	[1]	68	HTP	[8]
ASAP1_HUMAN	NEAR	823	837	SH3	LTP	[1]	839	mHTP	[15,8]
ASAP1_HUMAN	NEAR	823	837	SH3	LTP	[1]	843	mHTP	[14,15,8]
ASAP2_HUMAN	NEAR	781	794	SH3	HTP	[1]	763	HTP	[15]
ASPP2_HUMAN	NEAR	496	509	SH3	HTP	[1]	480	mHTP	[15,8]
ASPP2_HUMAN	INTRA	693	712	SH3	HTP	[1]	698	mHTP	[14,15,8]
ASPP2_HUMAN	NEAR	713	742	SH3	HTP	[1]	698	mHTP	[14,15,8]
ASPP2_HUMAN	INTRA	713	742	SH3	HTP	[1]	736	HTP	[15]
ASPP2_HUMAN	INTRA	713	742	SH3	HTP	[1]	737	HTP	[15]
AT2B2_HUMAN	INTRA	1233	1243	PDZ	LTP	[3]	1242	mHTP	[17,15,8]
AT2B2_HUMAN	INTRA	1233	1243	PDZ	LTP	[3]	1234	HTP	[17,15,8]
AT2B2_HUMAN	INTRA	1233	1243	PDZ	LTP	[3]	1238	HTP	[15,8]
AT2B2_HUMAN	INTRA	1233	1243	PDZ	LTP	[3]	1241	HTP	[17,15,8]
AT2B2_HUMAN	NEAR	1233	1243	PDZ	LTP	[3]	1229	HTP	[15]
AT2B2_HUMAN	NEAR	1233	1243	PDZ	LTP	[3]	1230	HTP	[15]
AT2B2_HUMAN	NEAR	1233	1243	PDZ	LTP	[3]	1231	HTP	[15,8]
AT2B4_HUMAN	NEAR	1231	1241	PDZ	LTP	[3]	1212	LTP	[14]
AT2B4_HUMAN	INTRA	1231	1241	PDZ	LTP	[3]	1240	HTP	[17]
B2CL1_HUMAN	NEAR	103	111	SH3	LTP	[1]	115	LTP	[14,15]
B2L11_HUMAN	INTRA	57	74	WW	LTP	[5]	59	LTP	[13]
B2L11_HUMAN	INTRA	57	74	WW	LTP	[5]	69	LTP	[14,13,15,18]
B2L11_HUMAN	NEAR	57	74	WW	LTP	[5]	77	LTP	[13,17,15,8]
B2L11_HUMAN	NEAR	57	74	WW	LTP	[5]	87	LTP	[15,8]
B3AT_HUMAN	INTRA	351	368	SH2	HTP	[5]	359	LTP	[14,13,15,8]
BCAR1_HUMAN	NEAR	107	124	SH2	HTP	[5]	139	mHTP	[14,15,8]
BCAR1_HUMAN	INTRA	107	124	SH2	HTP	[5]	115	LTP	[13]
BCAR1_HUMAN	NEAR	107	124	SH2	HTP	[5]	128	LTP	[14,13,15,18,8]
BCAR1_HUMAN	NEAR	107	124	SH2	HTP	[5]	134	HTP	[15,8]
BCAR1_HUMAN	NEAR	120	137	SH2	HTP	[5]	139	mHTP	[14,15,8]
BCAR1_HUMAN	INTRA	120	137	SH2	HTP	[5]	128	LTP	[14,13,15,18,8]
BCAR1_HUMAN	NEAR	120	137	SH2	HTP	[5]	115	LTP	[13]
BCAR1_HUMAN	INTRA	120	137	SH2	HTP	[5]	134	HTP	[15,8]
BCAR1_HUMAN	NEAR	157	174	SH2	HTP	[5]	139	mHTP	[14,15,8]
BCAR1_HUMAN	INTRA	157	174	SH2	HTP	[5]	165	LTP	[14,13,15]
BCAR1_HUMAN	NEAR	157	174	SH2	HTP	[5]	179	LTP	[13]
BCAR1_HUMAN	NEAR	157	174	SH2	HTP	[5]	192	LTP	[13]
BCAR1_HUMAN	INTRA	171	188	SH2	HTP	[5]	179	LTP	[13]
BCAR1_HUMAN	NEAR	171	188	SH2	HTP	[5]	165	LTP	[14,13,15]
BCAR1_HUMAN	NEAR	171	188	SH2	HTP	[5]	192	LTP	[13]
BCAR1_HUMAN	INTRA	184	201	SH2	HTP	[5]	192	LTP	[13]
BCAR1_HUMAN	NEAR	184	201	SH2	HTP	[5]	165	LTP	[14,13,15]
BCAR1_HUMAN	NEAR	184	201	SH2	HTP	[5]	179	LTP	[13]
BCAR1_HUMAN	INTRA	226	243	SH2	HTP	[5]	234	LTP	[13,15,8]
BCAR1_HUMAN	NEAR	226	243	SH2	HTP	[5]	249	LTP	[14,13,15,18,8]
BCAR1_HUMAN	NEAR	226	243	SH2	HTP	[5]	222	HTP	[13,15,8]
BCAR1_HUMAN	NEAR	226	243	SH2	HTP	[5]	224	HTP	[13,15,8]
BCAR1_HUMAN	INTRA	241	262	SH2	HTP	[5]	249	LTP	[14,13,15,18,8]
BCAR1_HUMAN	NEAR	241	262	SH2	HTP	[5]	234	LTP	[13,15,8]
BCAR1_HUMAN	NEAR	241	262	SH2	HTP	[5]	267	LTP	[13,15,8]
BCAR1_HUMAN	NEAR	241	262	SH2	HTP	[5]	222	HTP	[13,15,8]
BCAR1_HUMAN	NEAR	241	262	SH2	HTP	[5]	224	HTP	[13,15,8]
BCAR1_HUMAN	NEAR	241	262	SH2	HTP	[5]	269	HTP	[15,8]
BCAR1_HUMAN	INTRA	259	276	SH2	HTP	[5]	267	LTP	[13,15,8]
BCAR1_HUMAN	NEAR	259	276	SH2	HTP	[5]	249	LTP	[14,13,15,18,8]
BCAR1_HUMAN	NEAR	259	276	SH2	HTP	[5]	287	LTP	[13,15,8]
BCAR1_HUMAN	INTRA	259	276	SH2	HTP	[5]	269	HTP	[15,8]
BCAR1_HUMAN	NEAR	259	276	SH2	HTP	[5]	292	HTP	[15,8]
BCAR1_HUMAN	INTRA	279	296	SH2	HTP	[5]	287	LTP	[13,15,8]
BCAR1_HUMAN	NEAR	279	296	SH2	HTP	[5]	267	LTP	[13,15,8]
BCAR1_HUMAN	NEAR	279	296	SH2	HTP	[5]	306	LTP	[14,13,15]
BCAR1_HUMAN	INTRA	279	296	SH2	HTP	[5]	292	HTP	[15,8]
BCAR1_HUMAN	NEAR	279	296	SH2	HTP	[5]	269	HTP	[15,8]
BCAR1_HUMAN	INTRA	298	315	SH2	HTP	[5]	306	LTP	[14,13,15]
BCAR1_HUMAN	NEAR	298	315	SH2	HTP	[5]	287	LTP	[13,15,8]
BCAR1_HUMAN	NEAR	298	315	SH2	HTP	[5]	327	LTP	[14,13,15,18,8]
BCAR1_HUMAN	NEAR	298	315	SH2	HTP	[5]	292	HTP	[15,8]
BCAR1_HUMAN	INTRA	319	340	SH2	HTP	[5]	327	LTP	[14,13,15,18,8]
BCAR1_HUMAN	NEAR	319	340	SH2	HTP	[5]	306	LTP	[14,13,15]
BCAR1_HUMAN	INTRA	346	385	SH2	HTP	[5]	362	LTP	[13,15,8]
BCAR1_HUMAN	NEAR	346	385	SH2	HTP	[5]	327	LTP	[14,13,15,18,8]
BCAR1_HUMAN	NEAR	346	385	SH2	HTP	[5]	387	LTP	[14,13,15,8]
BCAR1_HUMAN	INTRA	346	385	SH2	HTP	[5]	372	HTP	[15]
BCAR1_HUMAN	INTRA	354	371	SH2	HTP	[5]	362	LTP	[13,15,8]
BCAR1_HUMAN	NEAR	354	371	SH2	HTP	[5]	387	LTP	[14,13,15,8]
BCAR1_HUMAN	NEAR	354	371	SH2	HTP	[5]	372	HTP	[15]
BCAR1_HUMAN	NEAR	364	385	SH2	HTP	[5]	362	LTP	[13,15,8]
BCAR1_HUMAN	NEAR	364	385	SH2	HTP	[5]	387	LTP	[14,13,15,8]
BCAR1_HUMAN	INTRA	364	385	SH2	HTP	[5]	372	HTP	[15]
BCAR1_HUMAN	INTRA	379	400	SH2	HTP	[5]	387	LTP	[14,13,15,8]
BCAR1_HUMAN	NEAR	379	400	SH2	HTP	[5]	362	LTP	[13,15,8]
BCAR1_HUMAN	NEAR	379	400	SH2	HTP	[5]	410	LTP	[14,13,15,18,8]
BCAR1_HUMAN	NEAR	379	400	SH2	HTP	[5]	372	HTP	[15]
BCAR1_HUMAN	INTRA	402	419	SH2	HTP	[5]	410	LTP	[14,13,15,18,8]
BCAR1_HUMAN	NEAR	402	419	SH2	HTP	[5]	387	LTP	[14,13,15,8]
BCAR1_HUMAN	NEAR	402	419	SH2	HTP	[5]	437	HTP	[15]
BCAR1_HUMAN	NEAR	632	644	SH3	HTP	[1]	653	LTP	[14,13,18]
BCAR1_HUMAN	NEAR	632	644	SH3	HTP	[1]	664	LTP	[14,13,15,18]
BCAR1_HUMAN	INTRA	632	644	SH3	HTP	[1]	639	HTP	[14,13,15,16,8]
BCAR1_HUMAN	INTRA	653	656	SH2	LTP	[5]	653	LTP	[14,13,18]
BCAR1_HUMAN	NEAR	653	656	SH2	LTP	[5]	664	LTP	[14,13,15,18]
BCAR1_HUMAN	NEAR	653	656	SH2	LTP	[5]	666	LTP	[13]
BCAR1_HUMAN	NEAR	653	656	SH2	LTP	[5]	639	HTP	[14,13,15,16,8]
BCAR1_HUMAN	INTRA	664	667	SH2	LTP	[5]	664	LTP	[14,13,15,18]
BCAR1_HUMAN	INTRA	664	667	SH2	LTP	[5]	666	LTP	[13]
BCAR1_HUMAN	NEAR	664	667	SH2	LTP	[5]	653	LTP	[14,13,18]
BCL2_HUMAN	INTRA	7	24	SH3	LTP	[1]	24	LTP	[13]
BCL2_HUMAN	INTRA	79	96	WW	HTP	[5]	87	LTP	[14,13,15,18]
BCL2_HUMAN	NEAR	79	96	WW	HTP	[5]	69	LTP	[14,13,15]
BCL2_HUMAN	NEAR	79	96	WW	HTP	[5]	70	LTP	[14,13,15,18,8]
BCL2_HUMAN	NEAR	79	96	WW	HTP	[5]	74	LTP	[14,13,15]
BCL2_HUMAN	NEAR	103	120	SH3	LTP	[1]	87	LTP	[14,13,15,18]
BCR_HUMAN	INTRA	169	186	SH2	LTP	[5]	177	LTP	[14,13,15,8]
BCR_HUMAN	INTRA	238	255	SH2	LTP	[5]	246	LTP	[14,13,15,18,8]
BCR_HUMAN	NEAR	238	255	SH2	LTP	[5]	231	HTP	[14,15]
BCR_HUMAN	INTRA	268	285	SH2	LTP	[5]	276	LTP	[14,13]
BCR_HUMAN	INTRA	268	285	SH2	LTP	[5]	279	LTP	[14,13]
BCR_HUMAN	INTRA	268	285	SH2	LTP	[5]	283	LTP	[14,13]
BCR_HUMAN	INTRA	271	288	SH2	LTP	[5]	276	LTP	[14,13]
BCR_HUMAN	INTRA	271	288	SH2	LTP	[5]	279	LTP	[14,13]
BCR_HUMAN	INTRA	271	288	SH2	LTP	[5]	283	LTP	[14,13]
BCR_HUMAN	INTRA	275	292	SH2	LTP	[5]	276	LTP	[14,13]
BCR_HUMAN	INTRA	275	292	SH2	LTP	[5]	279	LTP	[14,13]
BCR_HUMAN	INTRA	275	292	SH2	LTP	[5]	283	LTP	[14,13]
BCR_HUMAN	NEAR	275	292	SH2	LTP	[5]	310	HTP	[14,13,15,18,8]
BCR_HUMAN	NEAR	308	325	SH2	LTP	[5]	328	LTP	[14,13,15]
BCR_HUMAN	INTRA	308	325	SH2	LTP	[5]	310	HTP	[14,13,15,18,8]
BCR_HUMAN	INTRA	320	337	SH2	LTP	[5]	328	LTP	[14,13,15]
BCR_HUMAN	NEAR	320	337	SH2	LTP	[5]	354	LTP	[13,15]
BCR_HUMAN	NEAR	320	337	SH2	LTP	[5]	310	HTP	[14,13,15,18,8]
BCR_HUMAN	INTRA	352	369	SH2	LTP	[5]	354	LTP	[13,15]
BCR_HUMAN	INTRA	352	369	SH2	LTP	[5]	360	LTP	[14,13,15]
BCR_HUMAN	NEAR	428	445	SH2	LTP	[5]	459	mHTP	[14,13,17,15,16,18,8]
BCR_HUMAN	NEAR	428	445	SH2	LTP	[5]	463	mHTP	[14,13,15,16,18,8]
BCR_HUMAN	INTRA	428	445	SH2	LTP	[5]	436	HTP	[14,15]
BCR_HUMAN	NEAR	428	445	SH2	LTP	[5]	455	HTP	[15]
BCR_HUMAN	NEAR	428	445	SH2	LTP	[5]	461	HTP	[17,15,16]
BCR_HUMAN	NEAR	428	445	SH2	LTP	[5]	462	HTP	[15,16]
BCR_HUMAN	INTRA	1261	1271	PDZ	LTP	[2]	1264	LTP	[14,15,18,8]
BRCA1_HUMAN	INTRA	978	991	SH3	HTP	[1]	988	LTP	[14,13,15,18]
BRCA1_HUMAN	NEAR	978	991	SH3	HTP	[1]	1007	HTP	[17]
BTK_HUMAN	NEAR	186	192	SH3	LTP	[1]	180	LTP	[13]
BTK_HUMAN	NEAR	186	192	SH3	LTP	[1]	179	HTP	[20]
BTK_HUMAN	NEAR	200	206	SH3	LTP	[4]	180	LTP	[13]
BTK_HUMAN	NEAR	200	206	SH3	LTP	[4]	223	LTP	[14,13,8]
CADH5_HUMAN	INTRA	677	694	SH2	LTP	[5]	685	LTP	[13,15,8]
CADH5_HUMAN	NEAR	677	694	SH2	LTP	[5]	658	LTP	[13,15]
CADH5_HUMAN	NEAR	677	694	SH2	LTP	[5]	665	LTP	[15]
CAF1A_HUMAN	NEAR	233	245	SH3	HTP	[1]	259	mHTP	[17,8]
CAF1A_HUMAN	NEAR	233	245	SH3	HTP	[1]	224	HTP	[17,8]
CAF1A_HUMAN	NEAR	233	245	SH3	HTP	[1]	255	HTP	[17,8]
CASL_HUMAN	INTRA	621	640	SH2	LTP	[5]	629	HTP	[15]
CASL_HUMAN	INTRA	621	640	SH2	LTP	[5]	631	HTP	[15]
CATA_HUMAN	NEAR	272	289	SH2	LTP	[5]	308	HTP	[13,8]
CAV1_HUMAN	INTRA	6	23	SH2	LTP	[5]	6	mHTP	[14,13,15,8]
CAV1_HUMAN	NEAR	6	23	SH2	LTP	[5]	25	mHTP	[14,15,8]
CAV1_HUMAN	INTRA	6	23	SH2	LTP	[5]	14	LTP	[14,13,15,8]
CAV1_HUMAN	NEAR	6	23	SH2	LTP	[5]	37	LTP	[14,13,17,15,16,8]
CAV1_HUMAN	NEAR	6	23	SH2	LTP	[5]	42	HTP	[15,8]
CBLB_HUMAN	INTRA	657	674	SH2	LTP	[5]	665	HTP	[8]
CBLB_HUMAN	INTRA	701	718	SH2	LTP	[5]	709	LTP	[8]
CBLB_HUMAN	NEAR	902	907	SH3	LTP	[1]	889	LTP	[15,8]
CBL_HUMAN	INTRA	329	346	SH2	HTP	[5]	337	LTP	[14]
CBL_HUMAN	INTRA	363	380	SH2	LTP	[5]	368	LTP	[14,15]
CBL_HUMAN	INTRA	363	380	SH2	LTP	[5]	371	LTP	[14,13,15,8]
CBL_HUMAN	NEAR	540	550	SH3	LTP	[1]	552	HTP	[14,13,15,8]
CBL_HUMAN	NEAR	540	550	SH2	HTP	[5]	552	HTP	[14,13,15,8]
CBL_HUMAN	INTRA	666	683	SH2	HTP	[5]	669	mHTP	[14,13,15,8]
CBL_HUMAN	INTRA	666	683	SH2	HTP	[5]	674	LTP	[14,13,15,8]
CBL_HUMAN	NEAR	666	683	SH2	HTP	[5]	700	LTP	[14,13,15,18,8]
CBL_HUMAN	INTRA	666	683	SH2	HTP	[5]	667	HTP	[14,13,15,18,8]
CBL_HUMAN	INTRA	666	683	SH2	HTP	[5]	675	HTP	[14,13,15,18,8]
CBL_HUMAN	INTRA	692	709	SH2	LTP	[5]	700	LTP	[14,13,15,18,8]
CBL_HUMAN	NEAR	692	709	SH2	LTP	[5]	674	LTP	[14,13,15,8]
CBL_HUMAN	NEAR	692	709	SH2	LTP	[5]	675	HTP	[14,13,15,18,8]
CBL_HUMAN	INTRA	723	740	SH2	LTP	[5]	731	LTP	[14,13,15,18]
CBL_HUMAN	INTRA	766	783	SH2	LTP	[5]	774	LTP	[14,13,15,18,8]
CCNE1_HUMAN	NEAR	387	404	WW	HTP	[5]	381	mHTP	[17,15,20]
CCNE1_HUMAN	INTRA	387	404	WW	HTP	[5]	387	LTP	[14,13,17,15,20,8]
CCNE1_HUMAN	INTRA	387	404	WW	HTP	[5]	395	LTP	[14,13,17,15,18,20,8]
CCNE1_HUMAN	INTRA	387	404	WW	HTP	[5]	399	LTP	[14,13,17,15,8]
CCNE1_HUMAN	INTRA	387	404	WW	HTP	[5]	391	HTP	[17,15]
CCNE2_HUMAN	INTRA	384	401	WW	HTP	[5]	392	LTP	[14,13,17,15,8]
CCNE2_HUMAN	INTRA	384	401	WW	HTP	[5]	396	LTP	[17,15]
CCNE2_HUMAN	NEAR	384	401	WW	HTP	[5]	383	HTP	[17,15,8]
CD19_HUMAN	INTRA	348	351	SH2	LTP	[4]	348	LTP	[14,13,15,18,8]
CD19_HUMAN	NEAR	348	351	SH2	LTP	[4]	337	HTP	[15]
CD19_HUMAN	INTRA	378	381	SH2	LTP	[4]	378	LTP	[14,13,15,8]
CD19_HUMAN	INTRA	401	418	SH2	LTP	[5]	409	LTP	[14,13,15,8]
CD19_HUMAN	INTRA	492	509	SH2	LTP	[5]	500	LTP	[14,13,15]
CD19_HUMAN	INTRA	492	509	SH2	LTP	[5]	508	LTP	[13]
CD19_HUMAN	INTRA	492	509	SH2	LTP	[5]	497	HTP	[13,15,8]
CD19_HUMAN	INTRA	523	540	SH2	LTP	[5]	531	LTP	[14,13,15,18]
CD19_HUMAN	NEAR	523	540	SH2	LTP	[5]	508	LTP	[13]
CD22_HUMAN	INTRA	754	771	SH2	HTP	[5]	762	LTP	[15,8]
CD22_HUMAN	INTRA	814	831	SH2	HTP	[5]	822	LTP	[15,8]
CD22_HUMAN	NEAR	814	831	SH2	HTP	[5]	807	LTP	[14,15,8]
CD22_HUMAN	NEAR	814	831	SH2	HTP	[5]	842	LTP	[14,15,8]
CD22_HUMAN	INTRA	834	847	SH2	HTP	[5]	842	LTP	[14,15,8]
CD22_HUMAN	NEAR	834	847	SH2	HTP	[5]	822	LTP	[15,8]
CD244_HUMAN	INTRA	258	275	SH2	HTP	[5]	271	HTP	[15,8]
CD244_HUMAN	NEAR	284	301	SH2	HTP	[5]	271	HTP	[15,8]
CD28_HUMAN	INTRA	183	200	SH2	LTP	[5]	191	LTP	[14,13,15,18,8]
CD28_HUMAN	NEAR	183	200	SH2	LTP	[5]	206	LTP	[14,13,15]
CD28_HUMAN	NEAR	183	200	SH2	LTP	[5]	209	LTP	[14,13,15,8]
CD28_HUMAN	NEAR	183	200	SH2	LTP	[5]	218	LTP	[14,13,15,8]
CD28_HUMAN	INTRA	183	200	SH2	LTP	[5]	189	HTP	[8]
CD2AP_HUMAN	NEAR	490	503	SH3	HTP	[1]	510	HTP	[14,13,17,15,16,8]
CD2AP_HUMAN	NEAR	490	503	SH3	HTP	[1]	514	HTP	[15]
CD33_HUMAN	INTRA	332	349	SH2	LTP	[5]	340	LTP	[14,13,15,18,8]
CD33_HUMAN	NEAR	332	349	SH2	LTP	[5]	358	LTP	[14,15,8]
CD3D_HUMAN	INTRA	141	158	SH2	HTP	[5]	149	mHTP	[14,13,15,8]
CD3D_HUMAN	NEAR	141	158	SH2	HTP	[5]	160	mHTP	[14,13,15,18,8]
CD3D_HUMAN	INTRA	152	169	SH2	HTP	[5]	160	mHTP	[14,13,15,18,8]
CD3D_HUMAN	NEAR	152	169	SH2	HTP	[5]	149	mHTP	[14,13,15,8]
CD3E_HUMAN	NEAR	150	170	SH3	LTP	[1]	188	LTP	[14,13,15,8]
CD3E_HUMAN	NEAR	175	186	SH3	LTP	[1]	188	LTP	[14,13,15,8]
CD3E_HUMAN	NEAR	175	186	SH3	LTP	[1]	199	LTP	[14,13,15,8]
CD3E_HUMAN	NEAR	175	186	SH3	LTP	[1]	200	HTP	[13]
CD3E_HUMAN	INTRA	188	191	SH2	LTP	[2]	188	LTP	[14,13,15,8]
CD3E_HUMAN	NEAR	188	191	SH2	LTP	[2]	199	LTP	[14,13,15,8]
CD3E_HUMAN	NEAR	188	191	SH2	LTP	[2]	200	HTP	[13]
CD3E_HUMAN	INTRA	191	207	SH2	LTP	[5]	199	LTP	[14,13,15,8]
CD3E_HUMAN	NEAR	191	207	SH2	LTP	[5]	188	LTP	[14,13,15,8]
CD3E_HUMAN	INTRA	191	207	SH2	LTP	[5]	200	HTP	[13]
CD3G_HUMAN	NEAR	152	169	SH2	HTP	[5]	145	LTP	[14,18,8]
CD3G_HUMAN	NEAR	152	169	SH2	HTP	[5]	148	LTP	[14,15,18,8]
CD3G_HUMAN	NEAR	152	169	SH2	HTP	[5]	171	LTP	[14,13,15,18,8]
CD3G_HUMAN	INTRA	152	169	SH2	HTP	[5]	160	HTP	[14,13,15,8]
CD3G_HUMAN	INTRA	163	180	SH2	HTP	[5]	171	LTP	[14,13,15,18,8]
CD3G_HUMAN	NEAR	163	180	SH2	HTP	[5]	145	LTP	[14,18,8]
CD3G_HUMAN	NEAR	163	180	SH2	HTP	[5]	148	LTP	[14,15,18,8]
CD3G_HUMAN	NEAR	163	180	SH2	HTP	[5]	160	HTP	[14,13,15,8]
CD3Z_HUMAN	NEAR	34	51	SH2	HTP	[5]	64	mHTP	[14,13,15,8]
CD3Z_HUMAN	NEAR	34	51	SH2	HTP	[5]	58	HTP	[14,13,15,8]
CD3Z_HUMAN	INTRA	64	81	SH2	LTP	[5]	64	mHTP	[14,13,15,8]
CD3Z_HUMAN	INTRA	64	81	SH2	LTP	[5]	72	LTP	[14,13,15,8]
CD3Z_HUMAN	NEAR	64	81	SH2	LTP	[5]	83	LTP	[14,13,15,8]
CD3Z_HUMAN	NEAR	64	81	SH2	LTP	[5]	58	HTP	[14,13,15,8]
CD3Z_HUMAN	NEAR	75	92	SH2	LTP	[5]	64	mHTP	[14,13,15,8]
CD3Z_HUMAN	INTRA	75	92	SH2	LTP	[5]	83	LTP	[14,13,15,8]
CD3Z_HUMAN	NEAR	75	92	SH2	LTP	[5]	111	LTP	[14,13,15,8]
CD3Z_HUMAN	NEAR	75	92	SH2	LTP	[5]	72	LTP	[14,13,15,8]
CD3Z_HUMAN	NEAR	75	92	SH2	LTP	[5]	58	HTP	[14,13,15,8]
CD3Z_HUMAN	INTRA	103	120	SH2	LTP	[5]	111	LTP	[14,13,15,8]
CD3Z_HUMAN	NEAR	103	120	SH2	LTP	[5]	123	LTP	[14,13,15,8]
CD3Z_HUMAN	NEAR	103	120	SH2	LTP	[5]	83	LTP	[14,13,15,8]
CD3Z_HUMAN	INTRA	115	132	SH2	LTP	[5]	123	LTP	[14,13,15,8]
CD3Z_HUMAN	NEAR	115	132	SH2	LTP	[5]	111	LTP	[14,13,15,8]
CD3Z_HUMAN	NEAR	115	132	SH2	LTP	[5]	142	LTP	[14,13,15,8]
CD3Z_HUMAN	INTRA	134	151	SH2	LTP	[5]	142	LTP	[14,13,15,8]
CD3Z_HUMAN	NEAR	134	151	SH2	LTP	[5]	123	LTP	[14,13,15,8]
CD3Z_HUMAN	NEAR	134	151	SH2	LTP	[5]	153	LTP	[14,13,15,18,8]
CD3Z_HUMAN	INTRA	145	162	SH2	LTP	[5]	153	LTP	[14,13,15,18,8]
CD3Z_HUMAN	NEAR	145	162	SH2	LTP	[5]	142	LTP	[14,13,15,8]
CD5_HUMAN	NEAR	445	462	SH2	HTP	[5]	439	mHTP	[14,13,15,18,8]
CD5_HUMAN	INTRA	445	462	SH2	HTP	[5]	453	LTP	[14,13,15,18,8]
CD5_HUMAN	NEAR	445	462	SH2	HTP	[5]	434	LTP	[14,13,15]
CD5_HUMAN	NEAR	445	462	SH2	HTP	[5]	436	LTP	[14,13,15]
CD5_HUMAN	NEAR	445	462	SH2	HTP	[5]	465	LTP	[14,13,15]
CD5_HUMAN	NEAR	445	462	SH2	HTP	[5]	482	LTP	[14,13,15,18,8]
CD5_HUMAN	INTRA	445	462	SH2	HTP	[5]	454	HTP	[13]
CD5_HUMAN	INTRA	445	462	SH2	HTP	[5]	460	HTP	[14,13,15,18,8]
CD79A_HUMAN	INTRA	180	197	SH2	LTP	[5]	182	LTP	[14,18]
CD79A_HUMAN	INTRA	180	197	SH2	LTP	[5]	188	LTP	[14,13,18]
CD79A_HUMAN	NEAR	180	197	SH2	LTP	[5]	199	LTP	[14,13,18]
CD79A_HUMAN	NEAR	180	197	SH2	LTP	[5]	210	LTP	[14,15,8]
CD79A_HUMAN	INTRA	191	208	SH2	LTP	[5]	199	LTP	[14,13,18]
CD79A_HUMAN	NEAR	191	208	SH2	LTP	[5]	182	LTP	[14,18]
CD79A_HUMAN	NEAR	191	208	SH2	LTP	[5]	188	LTP	[14,13,18]
CD79A_HUMAN	NEAR	191	208	SH2	LTP	[5]	210	LTP	[14,15,8]
CD79B_HUMAN	INTRA	188	205	SH2	LTP	[5]	196	LTP	[14,18]
CD79B_HUMAN	NEAR	188	205	SH2	LTP	[5]	207	LTP	[14]
CD79B_HUMAN	INTRA	199	216	SH2	LTP	[5]	207	LTP	[14]
CD79B_HUMAN	NEAR	199	216	SH2	LTP	[5]	196	LTP	[14,18]
CD7_HUMAN	INTRA	214	231	SH2	HTP	[5]	222	HTP	[15]
CDC27_HUMAN	NEAR	398	411	SH3	HTP	[1]	426	LTP	[14,15,8]
CDC27_HUMAN	NEAR	398	411	SH3	HTP	[1]	430	LTP	[14,15,8]
CDC27_HUMAN	NEAR	398	411	SH3	HTP	[1]	383	HTP	[15]
CDC27_HUMAN	NEAR	398	411	SH3	HTP	[1]	384	HTP	[15]
CDC27_HUMAN	NEAR	398	411	SH3	HTP	[1]	386	HTP	[15]
CDC27_HUMAN	NEAR	398	411	SH3	HTP	[1]	387	HTP	[15]
CDC27_HUMAN	NEAR	398	411	SH3	HTP	[1]	389	HTP	[15]
CDCP1_HUMAN	INTRA	726	743	SH2	LTP	[5]	734	LTP	[14,13,15,8]
CDCP1_HUMAN	INTRA	726	743	SH2	LTP	[5]	743	LTP	[15]
CDCP1_HUMAN	NEAR	726	743	SH2	LTP	[5]	762	LTP	[14,15]
CDCP1_HUMAN	NEAR	726	743	SH2	LTP	[5]	707	HTP	[15,8]
CDN1B_HUMAN	INTRA	84	98	SH3	LTP	[1]	88	LTP	[14,13,15,8]
CDN1B_HUMAN	INTRA	84	98	SH3	LTP	[1]	89	LTP	[14,15,8]
CDN1B_HUMAN	NEAR	84	98	SH3	LTP	[1]	74	LTP	[13,15,8]
CDN1B_HUMAN	NEAR	84	98	SH3	LTP	[1]	83	LTP	[14,15]
CENPA_HUMAN	INTRA	6	19	SH3	HTP	[1]	17	LTP	[13,17,15,8]
CENPA_HUMAN	INTRA	6	19	SH3	HTP	[1]	19	LTP	[13,17,15,8]
CENPA_HUMAN	INTRA	6	19	SH3	HTP	[1]	7	LTP	[14,13,15,18,8]
CENPA_HUMAN	NEAR	6	19	SH3	HTP	[1]	21	LTP	[15]
CENPA_HUMAN	NEAR	6	19	SH3	HTP	[1]	23	HTP	[13,15,8]
CENPA_HUMAN	NEAR	6	19	SH3	HTP	[1]	27	HTP	[15,8]
CKAP5_HUMAN	INTRA	813	826	SH3	HTP	[1]	816	mHTP	[14,13,15,18,8]
CKAP5_HUMAN	NEAR	813	826	SH3	HTP	[1]	829	HTP	[15]
CKAP5_HUMAN	NEAR	813	826	SH3	HTP	[1]	832	HTP	[15]
CLD1_HUMAN	INTRA	201	211	PDZ	LTP	[3]	210	HTP	[15]
CLM1_HUMAN	INTRA	197	214	SH2	LTP	[5]	205	LTP	[15]
CNTP2_HUMAN	NEAR	1321	1331	PDZ	LTP	[1]	1303	HTP	[8]
CNTP2_HUMAN	NEAR	1321	1331	PDZ	LTP	[1]	1306	HTP	[8]
CPSF6_HUMAN	NEAR	379	395	WW	LTP	[5]	404	HTP	[17,15,16,8]
CPSF6_HUMAN	NEAR	379	395	WW	LTP	[5]	407	HTP	[15,16,8]
CPSF6_HUMAN	NEAR	379	395	WW	LTP	[5]	410	HTP	[16]
CRK_HUMAN	NEAR	213	230	SH2	LTP	[5]	239	mHTP	[13,17,15,16,8]
CRK_HUMAN	INTRA	213	230	SH2	LTP	[5]	221	LTP	[14,13,17,15,16,18,8]
CRK_HUMAN	NEAR	213	230	SH2	LTP	[5]	194	HTP	[15]
CSF1R_HUMAN	INTRA	553	570	SH2	LTP	[5]	561	LTP	[14,15]
CSF1R_HUMAN	INTRA	553	570	SH2	LTP	[5]	555	HTP	[15,8]
CSF1R_HUMAN	INTRA	553	570	SH2	LTP	[5]	556	HTP	[15,8]
CSF1R_HUMAN	INTRA	553	570	SH2	LTP	[5]	562	HTP	[15,8]
CSF1R_HUMAN	INTRA	553	570	SH2	LTP	[5]	567	HTP	[15,8]
CSF1R_HUMAN	INTRA	691	708	SH2	LTP	[5]	699	LTP	[14,15,18,20,8]
CSF1R_HUMAN	INTRA	691	708	SH2	LTP	[5]	708	LTP	[14,15,8]
CSF1R_HUMAN	NEAR	691	708	SH2	LTP	[5]	723	LTP	[14,13,15]
CSF1R_HUMAN	NEAR	691	708	SH2	LTP	[5]	713	HTP	[15,20]
CSF1R_HUMAN	NEAR	691	708	SH2	LTP	[5]	716	HTP	[15,20,8]
CSF1R_HUMAN	INTRA	715	732	SH2	HTP	[5]	723	LTP	[14,13,15]
CSF1R_HUMAN	NEAR	715	732	SH2	HTP	[5]	699	LTP	[14,15,18,20,8]
CSF1R_HUMAN	NEAR	715	732	SH2	HTP	[5]	708	LTP	[14,15,8]
CSF1R_HUMAN	INTRA	715	732	SH2	HTP	[5]	716	HTP	[15,20,8]
CSF1R_HUMAN	NEAR	715	732	SH2	HTP	[5]	713	HTP	[15,20]
CSF1R_HUMAN	INTRA	801	818	SH2	LTP	[5]	809	LTP	[14,13,15,8]
CSF3R_HUMAN	INTRA	727	730	SH2	LTP	[4]	727	LTP	[14]
CSK21_HUMAN	INTRA	336	353	WW	HTP	[5]	344	LTP	[14,13,15,18]
CSK21_HUMAN	NEAR	336	353	WW	HTP	[5]	360	LTP	[14,13,17,15,18]
CSK21_HUMAN	NEAR	336	353	WW	HTP	[5]	362	LTP	[14,13,15,18,8]
CSK21_HUMAN	NEAR	336	353	WW	HTP	[5]	370	LTP	[14,13,17,15,18,8]
CSK21_HUMAN	INTRA	336	353	WW	HTP	[5]	353	HTP	[17]
CSK21_HUMAN	INTRA	352	369	WW	HTP	[5]	360	LTP	[14,13,17,15,18]
CSK21_HUMAN	INTRA	352	369	WW	HTP	[5]	362	LTP	[14,13,15,18,8]
CSK21_HUMAN	NEAR	352	369	WW	HTP	[5]	344	LTP	[14,13,15,18]
CSK21_HUMAN	NEAR	352	369	WW	HTP	[5]	370	LTP	[14,13,17,15,18,8]
CSK21_HUMAN	INTRA	352	369	WW	HTP	[5]	353	HTP	[17]
CTLA4_HUMAN	INTRA	193	210	SH2	LTP	[5]	201	LTP	[14,13,15]
CTLA4_HUMAN	NEAR	193	210	SH2	LTP	[5]	218	LTP	[15]
CTNB1_HUMAN	INTRA	238	255	WW	LTP	[5]	246	LTP	[15]
CTND2_HUMAN	NEAR	1215	1225	PDZ	LTP	[3]	1197	HTP	[15]
CXA1_HUMAN	INTRA	257	274	SH2	HTP	[5]	262	LTP	[14,8]
CXA1_HUMAN	INTRA	257	274	SH2	HTP	[5]	265	LTP	[13]
CXA1_HUMAN	NEAR	257	274	SH2	HTP	[5]	247	LTP	[13,8]
CXA1_HUMAN	NEAR	257	274	SH2	HTP	[5]	255	LTP	[14,13]
CXA1_HUMAN	NEAR	257	274	SH2	HTP	[5]	279	LTP	[14,13]
CXA1_HUMAN	NEAR	257	274	SH2	HTP	[5]	282	LTP	[14,13]
CXA1_HUMAN	INTRA	372	382	PDZ	LTP	[3]	373	LTP	[13,8]
CXA1_HUMAN	NEAR	372	382	PDZ	LTP	[3]	365	LTP	[13,8]
CXA1_HUMAN	NEAR	372	382	PDZ	LTP	[3]	368	LTP	[14,13,8]
CXA1_HUMAN	NEAR	372	382	PDZ	LTP	[3]	369	LTP	[13,8]
CXX1_HUMAN	INTRA	44	57	SH3	HTP	[1]	56	HTP	[8]
DAB1_HUMAN	INTRA	190	207	SH2	LTP	[5]	198	LTP	[14,13,15,8]
DAB1_HUMAN	INTRA	190	207	SH2	LTP	[5]	200	LTP	[13]
DAB1_HUMAN	NEAR	190	207	SH2	LTP	[5]	185	LTP	[13]
DAB1_HUMAN	NEAR	190	207	SH2	LTP	[5]	220	LTP	[14,13,15,8]
DAB1_HUMAN	INTRA	212	229	SH2	LTP	[5]	220	LTP	[14,13,15,8]
DAB1_HUMAN	NEAR	212	229	SH2	LTP	[5]	198	LTP	[14,13,15,8]
DAB1_HUMAN	NEAR	212	229	SH2	LTP	[5]	200	LTP	[13]
DAB1_HUMAN	NEAR	212	229	SH2	LTP	[5]	232	LTP	[14,13,15]
DAB1_HUMAN	INTRA	224	241	SH2	LTP	[5]	232	LTP	[14,13,15]
DAB1_HUMAN	NEAR	224	241	SH2	LTP	[5]	220	LTP	[14,13,15,8]
DAB2_HUMAN	INTRA	16	29	SH3	HTP	[1]	24	LTP	[14,13,15,18]
DAG1_HUMAN	INTRA	880	895	WW	LTP	[5]	892	LTP	[14,13,15]
DAG1_HUMAN	INTRA	880	895	WW	LTP	[5]	884	HTP	[17]
DAG1_HUMAN	INTRA	880	895	WW	LTP	[5]	886	HTP	[17]
DAG1_HUMAN	INTRA	880	895	WW	LTP	[5]	888	HTP	[17]
DAG1_HUMAN	INTRA	884	895	SH2	HTP	[5]	892	LTP	[14,13,15]
DAG1_HUMAN	INTRA	884	895	SH2	HTP	[5]	884	HTP	[17]
DAG1_HUMAN	INTRA	884	895	SH2	HTP	[5]	886	HTP	[17]
DAG1_HUMAN	INTRA	884	895	SH2	HTP	[5]	888	HTP	[17]
DCX_HUMAN	INTRA	404	421	WW	HTP	[5]	408	LTP	[13,8]
DCX_HUMAN	INTRA	404	421	WW	HTP	[5]	412	LTP	[13,8]
DCX_HUMAN	INTRA	404	421	WW	HTP	[5]	415	LTP	[13,8]
DCX_HUMAN	INTRA	404	421	WW	HTP	[5]	418	LTP	[8]
DCX_HUMAN	NEAR	404	421	WW	HTP	[5]	387	LTP	[13,8]
DCX_HUMAN	NEAR	404	421	WW	HTP	[5]	402	LTP	[13,8]
DCX_HUMAN	NEAR	404	421	WW	HTP	[5]	430	LTP	[8]
DCX_HUMAN	NEAR	404	421	WW	HTP	[5]	436	LTP	[8]
DCX_HUMAN	INTRA	404	421	WW	HTP	[5]	411	HTP	[13,8]
DDR1_HUMAN	INTRA	738	755	SH2	LTP	[5]	740	LTP	[15]
DDX41_HUMAN	NEAR	31	44	SH3	HTP	[1]	21	mHTP	[14,13,17,15,18,8]
DDX41_HUMAN	NEAR	31	44	SH3	HTP	[1]	23	mHTP	[14,13,17,15,18,8]
DDX41_HUMAN	INTRA	31	44	SH3	HTP	[1]	33	HTP	[15]
DLGP1_HUMAN	NEAR	539	552	SH3	HTP	[1]	530	LTP	[15]
DLGP1_HUMAN	NEAR	539	552	SH3	HTP	[1]	536	LTP	[15]
DLGP1_HUMAN	NEAR	539	552	SH3	HTP	[1]	537	LTP	[15]
DLGP4_HUMAN	NEAR	920	933	SH3	HTP	[1]	915	mHTP	[17,8]
DOCK1_HUMAN	NEAR	1819	1836	SH3	LTP	[1]	1811	HTP	[15,8]
DOK1_HUMAN	INTRA	138	155	SH2	HTP	[5]	146	LTP	[14,13,15]
DOK1_HUMAN	NEAR	138	155	SH2	HTP	[5]	174	LTP	[13]
DOK1_HUMAN	INTRA	166	183	SH2	HTP	[5]	174	LTP	[13]
DOK1_HUMAN	NEAR	166	183	SH2	HTP	[5]	146	LTP	[14,13,15]
DOK1_HUMAN	NEAR	166	183	SH2	HTP	[5]	203	LTP	[14]
DOK1_HUMAN	INTRA	195	212	SH2	HTP	[5]	203	LTP	[14]
DOK1_HUMAN	INTRA	288	305	SH2	HTP	[5]	291	LTP	[13,15,8]
DOK1_HUMAN	INTRA	288	305	SH2	HTP	[5]	296	LTP	[14,15,18,8]
DOK1_HUMAN	NEAR	288	305	SH2	HTP	[5]	269	LTP	[14,13,15,8]
DOK1_HUMAN	NEAR	288	305	SH2	HTP	[5]	315	LTP	[14,13,15,8]
DOK1_HUMAN	NEAR	288	305	SH2	HTP	[5]	281	HTP	[15,8]
DOK1_HUMAN	INTRA	307	324	SH2	HTP	[5]	315	LTP	[14,13,15,8]
DOK1_HUMAN	NEAR	307	324	SH2	HTP	[5]	291	LTP	[13,15,8]
DOK1_HUMAN	NEAR	307	324	SH2	HTP	[5]	296	LTP	[14,15,18,8]
DOK1_HUMAN	NEAR	307	324	SH2	HTP	[5]	337	LTP	[14,15,8]
DOK1_HUMAN	NEAR	307	324	SH2	HTP	[5]	341	LTP	[14,15,18,8]
DOK1_HUMAN	INTRA	329	346	SH2	HTP	[5]	337	LTP	[14,15,8]
DOK1_HUMAN	INTRA	329	346	SH2	HTP	[5]	341	LTP	[14,15,18,8]
DOK1_HUMAN	NEAR	329	346	SH2	HTP	[5]	315	LTP	[14,13,15,8]
DOK1_HUMAN	NEAR	329	346	SH2	HTP	[5]	362	LTP	[14,13,15,18,8]
DOK1_HUMAN	INTRA	354	371	SH2	LTP	[5]	362	LTP	[14,13,15,18,8]
DOK1_HUMAN	NEAR	354	371	SH2	LTP	[5]	337	LTP	[14,15,8]
DOK1_HUMAN	NEAR	354	371	SH2	LTP	[5]	341	LTP	[14,15,18,8]
DOK1_HUMAN	NEAR	354	371	SH2	LTP	[5]	377	LTP	[14,13,15,18,8]
DOK1_HUMAN	INTRA	369	386	SH2	HTP	[5]	377	LTP	[14,13,15,18,8]
DOK1_HUMAN	NEAR	369	386	SH2	HTP	[5]	362	LTP	[14,13,15,18,8]
DOK1_HUMAN	NEAR	369	386	SH2	HTP	[5]	398	LTP	[14,13,15,8]
DOK1_HUMAN	NEAR	369	386	SH2	HTP	[5]	402	HTP	[14,13,15,8]
DOK1_HUMAN	INTRA	390	407	SH2	LTP	[5]	398	LTP	[14,13,15,8]
DOK1_HUMAN	NEAR	390	407	SH2	LTP	[5]	377	LTP	[14,13,15,18,8]
DOK1_HUMAN	NEAR	390	407	SH2	LTP	[5]	409	LTP	[14,13,15,18,8]
DOK1_HUMAN	INTRA	390	407	SH2	LTP	[5]	402	HTP	[14,13,15,8]
DOK1_HUMAN	INTRA	394	411	SH2	HTP	[5]	398	LTP	[14,13,15,8]
DOK1_HUMAN	INTRA	394	411	SH2	HTP	[5]	409	LTP	[14,13,15,18,8]
DOK1_HUMAN	NEAR	394	411	SH2	HTP	[5]	377	LTP	[14,13,15,18,8]
DOK1_HUMAN	INTRA	394	411	SH2	HTP	[5]	402	HTP	[14,13,15,8]
DOK1_HUMAN	INTRA	401	418	SH2	HTP	[5]	409	LTP	[14,13,15,18,8]
DOK1_HUMAN	NEAR	401	418	SH2	HTP	[5]	398	LTP	[14,13,15,8]
DOK1_HUMAN	INTRA	401	418	SH2	HTP	[5]	402	HTP	[14,13,15,8]
DOK1_HUMAN	INTRA	441	458	SH2	LTP	[5]	443	LTP	[15]
DOK1_HUMAN	INTRA	441	458	SH2	LTP	[5]	446	LTP	[14,15]
DOK1_HUMAN	INTRA	441	458	SH2	LTP	[5]	449	LTP	[14,13,15,8]
DOK1_HUMAN	INTRA	441	458	SH2	LTP	[5]	450	LTP	[14,13,15]
DOK1_HUMAN	NEAR	441	458	SH2	LTP	[5]	439	LTP	[14,15]
DOK2_HUMAN	INTRA	263	280	SH2	LTP	[5]	271	LTP	[14,13,8]
DOK2_HUMAN	NEAR	263	280	SH2	LTP	[5]	299	LTP	[14,13,15,18,8]
DOK2_HUMAN	INTRA	291	308	SH2	LTP	[5]	299	LTP	[14,13,15,18,8]
DOK2_HUMAN	NEAR	291	308	SH2	LTP	[5]	271	LTP	[14,13,8]
DOK2_HUMAN	INTRA	337	354	SH2	LTP	[5]	345	LTP	[14,13,15,8]
DOK3_HUMAN	INTRA	373	390	SH2	LTP	[5]	381	HTP	[14,15,8]
DOK3_HUMAN	NEAR	390	407	SH2	LTP	[5]	381	HTP	[14,15,8]
DOK3_HUMAN	INTRA	424	441	SH2	LTP	[5]	432	HTP	[14,15]
DOK3_HUMAN	NEAR	424	441	SH2	LTP	[5]	453	HTP	[14,15]
DYN1_HUMAN	INTRA	778	798	SH3	LTP	[9]	780	mHTP	[14,17,15,18]
DYN1_HUMAN	NEAR	778	798	SH3	LTP	[9]	776	mHTP	[14,13,15,16,18,8]
DYN1_HUMAN	INTRA	778	798	SH3	LTP	[9]	778	LTP	[14,13,15,16,18,8]
DYN1_HUMAN	INTRA	778	798	SH3	LTP	[9]	795	LTP	[13,15]
DYN1_HUMAN	NEAR	778	798	SH3	LTP	[9]	774	LTP	[14,13,15,16,18,8]
DYN1_HUMAN	NEAR	778	798	SH3	LTP	[9]	777	LTP	[14,13,17,16]
DYN1_HUMAN	NEAR	833	838	SH3	LTP	[1]	822	LTP	[15]
DYN1_HUMAN	NEAR	833	838	SH3	LTP	[1]	851	LTP	[15]
DYN1_HUMAN	NEAR	833	838	SH3	LTP	[1]	857	LTP	[14,15]
DYN2_HUMAN	NEAR	825	839	SH3	LTP	[1]	848	LTP	[15]
E41L3_HUMAN	NEAR	388	401	SH3	HTP	[1]	409	HTP	[13]
EFNB1_HUMAN	INTRA	336	346	PDZ	LTP	[3]	343	LTP	[14,13,15]
EFNB1_HUMAN	NEAR	336	346	PDZ	LTP	[3]	324	LTP	[14,13,15]
EFNB1_HUMAN	NEAR	336	346	PDZ	LTP	[3]	329	LTP	[14,13,15]
EFNB1_HUMAN	INTRA	336	346	PDZ	LTP	[3]	338	HTP	[15]
EFNB1_HUMAN	NEAR	336	346	PDZ	LTP	[3]	317	HTP	[15,8]
EFNB2_HUMAN	NEAR	296	313	SH2	LTP	[5]	330	mHTP	[14,13,15,8]
EFNB2_HUMAN	INTRA	296	313	SH2	LTP	[5]	304	LTP	[14,13,15,8]
EFNB2_HUMAN	INTRA	296	313	SH2	LTP	[5]	311	LTP	[14,15,8]
EFNB2_HUMAN	NEAR	296	313	SH2	LTP	[5]	316	LTP	[14,15,8]
EFNB2_HUMAN	NEAR	296	313	SH2	LTP	[5]	325	HTP	[15,8]
EFNB2_HUMAN	NEAR	308	325	SH2	LTP	[5]	330	mHTP	[14,13,15,8]
EFNB2_HUMAN	INTRA	308	325	SH2	LTP	[5]	311	LTP	[14,15,8]
EFNB2_HUMAN	INTRA	308	325	SH2	LTP	[5]	316	LTP	[14,15,8]
EFNB2_HUMAN	NEAR	308	325	SH2	LTP	[5]	304	LTP	[14,13,15,8]
EFNB2_HUMAN	INTRA	308	325	SH2	LTP	[5]	325	HTP	[15,8]
EFNB2_HUMAN	INTRA	322	333	SH2	LTP	[5]	330	mHTP	[14,13,15,8]
EFNB2_HUMAN	NEAR	322	333	SH2	LTP	[5]	304	LTP	[14,13,15,8]
EFNB2_HUMAN	NEAR	322	333	SH2	LTP	[5]	311	LTP	[14,15,8]
EFNB2_HUMAN	NEAR	322	333	SH2	LTP	[5]	316	LTP	[14,15,8]
EFNB2_HUMAN	INTRA	322	333	SH2	LTP	[5]	325	HTP	[15,8]
EHMT2_HUMAN	NEAR	111	123	SH3	HTP	[1]	140	mHTP	[17,15,8]
EHMT2_HUMAN	NEAR	111	123	SH3	HTP	[1]	135	HTP	[17]
ELK1_HUMAN	NEAR	345	362	WW	HTP	[5]	336	LTP	[8]
ELK1_HUMAN	NEAR	345	362	WW	HTP	[5]	326	HTP	[15]
ELK1_HUMAN	NEAR	355	372	WW	HTP	[5]	336	LTP	[8]
ELK1_HUMAN	NEAR	355	372	WW	HTP	[5]	383	LTP	[14,13,15,18,8]
ELK1_HUMAN	NEAR	355	372	WW	HTP	[5]	389	LTP	[14,13,15,18,8]
ELK1_HUMAN	NEAR	360	377	WW	HTP	[5]	383	LTP	[14,13,15,18,8]
ELK1_HUMAN	NEAR	360	377	WW	HTP	[5]	389	LTP	[14,13,15,18,8]
ELK1_HUMAN	INTRA	375	392	WW	HTP	[5]	383	LTP	[14,13,15,18,8]
ELK1_HUMAN	INTRA	375	392	WW	HTP	[5]	389	LTP	[14,13,15,18,8]
ELMO1_HUMAN	NEAR	707	714	SH3	LTP	[8]	720	LTP	[13,15]
ELMO1_HUMAN	NEAR	707	714	SH3	LTP	[8]	724	HTP	[13,15]
ELMO2_HUMAN	NEAR	700	707	SH3	LTP	[8]	717	HTP	[15,8]
EPHB1_HUMAN	INTRA	586	603	SH2	LTP	[5]	594	LTP	[14,13,15]
EPHB1_HUMAN	INTRA	586	603	SH2	LTP	[5]	600	LTP	[14,13,15]
EPHB1_HUMAN	INTRA	920	937	SH2	LTP	[5]	928	LTP	[13,15,8]
EPHB2_HUMAN	INTRA	589	606	SH2	LTP	[5]	602	LTP	[15,20,8]
EPHB2_HUMAN	INTRA	589	606	SH2	LTP	[5]	596	HTP	[15,20,8]
EPHB2_HUMAN	NEAR	589	606	SH2	LTP	[5]	584	HTP	[17,15]
EPHB2_HUMAN	INTRA	595	612	SH2	LTP	[5]	602	LTP	[15,20,8]
EPHB2_HUMAN	INTRA	595	612	SH2	LTP	[5]	596	HTP	[15,20,8]
EPHB2_HUMAN	NEAR	595	612	SH2	LTP	[5]	584	HTP	[17,15]
EPHB2_HUMAN	INTRA	595	912	SH2	HTP	[5]	776	mHTP	[17,15,20,8]
EPHB2_HUMAN	INTRA	595	912	SH2	HTP	[5]	780	mHTP	[17,15,20,8]
EPHB2_HUMAN	INTRA	595	912	SH2	HTP	[5]	602	LTP	[15,20,8]
EPHB2_HUMAN	INTRA	595	912	SH2	HTP	[5]	596	HTP	[15,20,8]
EPHB2_HUMAN	INTRA	595	912	SH2	HTP	[5]	768	HTP	[15]
EPHB2_HUMAN	INTRA	595	912	SH2	HTP	[5]	775	HTP	[14,15,20,8]
EPHB2_HUMAN	INTRA	595	912	SH2	HTP	[5]	779	HTP	[15,20]
EPHB2_HUMAN	INTRA	595	912	SH2	HTP	[5]	781	HTP	[15]
EPHB2_HUMAN	INTRA	595	912	SH2	HTP	[5]	782	HTP	[15]
EPHB2_HUMAN	INTRA	595	912	SH2	HTP	[5]	897	HTP	[15,20]
EPHB2_HUMAN	NEAR	595	912	SH2	HTP	[5]	584	HTP	[17,15]
EPHB3_HUMAN	INTRA	606	623	SH2	LTP	[5]	614	LTP	[14,13,15,18]
EPHB3_HUMAN	INTRA	606	623	SH2	LTP	[5]	608	HTP	[14,13,15]
EPHB3_HUMAN	NEAR	606	623	SH2	LTP	[5]	600	HTP	[13,15,8]
EPHB3_HUMAN	NEAR	988	998	PDZ	LTP	[3]	971	HTP	[15]
EPOR_HUMAN	INTRA	368	371	SH2	LTP	[5]	368	LTP	[14,13,15,8]
EPOR_HUMAN	INTRA	424	434	SH2	LTP	[5]	426	LTP	[14,13,15,8]
EPOR_HUMAN	NEAR	424	434	SH2	LTP	[5]	454	LTP	[14,13,15,8]
EPOR_HUMAN	INTRA	445	465	SH2	LTP	[5]	454	LTP	[14,13,15,8]
EPOR_HUMAN	INTRA	445	465	SH2	LTP	[5]	456	LTP	[14,13,15,8]
EPOR_HUMAN	NEAR	445	465	SH2	LTP	[5]	426	LTP	[14,13,15,8]
EPOR_HUMAN	NEAR	445	465	SH2	LTP	[5]	468	LTP	[13,15,8]
EPOR_HUMAN	NEAR	445	465	SH2	LTP	[5]	485	LTP	[13,15,8]
EPOR_HUMAN	INTRA	452	462	SH2	LTP	[1]	454	LTP	[14,13,15,8]
EPOR_HUMAN	INTRA	452	462	SH2	LTP	[1]	456	LTP	[14,13,15,8]
EPOR_HUMAN	NEAR	452	462	SH2	LTP	[1]	468	LTP	[13,15,8]
EPOR_HUMAN	INTRA	477	494	SH2	HTP	[5]	485	LTP	[13,15,8]
EPOR_HUMAN	INTRA	477	494	SH2	HTP	[5]	489	LTP	[14,13,15,18,8]
EPOR_HUMAN	NEAR	477	494	SH2	HTP	[5]	468	LTP	[13,15,8]
EPOR_HUMAN	NEAR	477	494	SH2	HTP	[5]	504	LTP	[14,13,15,8]
EPOR_HUMAN	INTRA	496	508	SH2	LTP	[5]	504	LTP	[14,13,15,8]
EPOR_HUMAN	NEAR	496	508	SH2	LTP	[5]	485	LTP	[13,15,8]
EPOR_HUMAN	NEAR	496	508	SH2	LTP	[5]	489	LTP	[14,13,15,18,8]
EPS15_HUMAN	NEAR	768	774	SH3	LTP	[8]	777	HTP	[14,15,8]
EPS15_HUMAN	NEAR	768	774	SH3	LTP	[8]	790	HTP	[17]
EPS15_HUMAN	INTRA	777	789	SH3	HTP	[1]	777	HTP	[14,15,8]
EPS15_HUMAN	NEAR	777	789	SH3	HTP	[1]	790	HTP	[17]
EPS15_HUMAN	NEAR	777	789	SH3	HTP	[1]	796	HTP	[14,13,17,15,8]
ERBB2_HUMAN	INTRA	730	740	SH2	HTP	[1]	735	HTP	[13,15,8]
ERBB2_HUMAN	INTRA	918	928	SH2	HTP	[1]	923	HTP	[13]
ERBB2_HUMAN	NEAR	1000	1010	SH2	HTP	[1]	1023	LTP	[13,15]
ERBB2_HUMAN	INTRA	1000	1010	SH2	HTP	[1]	1005	HTP	[13,15]
ERBB2_HUMAN	NEAR	1000	1010	SH2	HTP	[1]	998	HTP	[17,15]
ERBB2_HUMAN	INTRA	1014	1030	SH2	HTP	[5]	1023	LTP	[13,15]
ERBB2_HUMAN	NEAR	1014	1030	SH2	HTP	[5]	1005	HTP	[13,15]
ERBB2_HUMAN	NEAR	1014	1030	SH2	HTP	[5]	998	HTP	[17,15]
ERBB2_HUMAN	INTRA	1131	1148	SH2	LTP	[5]	1139	LTP	[14,13,15,8]
ERBB2_HUMAN	NEAR	1131	1148	SH2	LTP	[5]	1112	LTP	[14,15]
ERBB2_HUMAN	INTRA	1131	1148	SH2	LTP	[5]	1134	HTP	[15]
ERBB2_HUMAN	NEAR	1131	1148	SH2	LTP	[5]	1127	HTP	[15]
ERBB2_HUMAN	NEAR	1131	1148	SH2	LTP	[5]	1151	HTP	[15]
ERBB2_HUMAN	NEAR	1131	1148	SH2	LTP	[5]	1166	HTP	[15]
ERBB2_HUMAN	INTRA	1191	1201	SH2	HTP	[5]	1196	LTP	[14,13,15,18,8]
ERBB2_HUMAN	NEAR	1191	1201	SH2	HTP	[5]	1172	LTP	[14,15]
ERBB2_HUMAN	NEAR	1191	1201	SH2	HTP	[5]	1221	LTP	[14,13,15]
ERBB2_HUMAN	INTRA	1212	1229	SH2	LTP	[5]	1221	LTP	[14,13,15]
ERBB2_HUMAN	INTRA	1212	1229	SH2	LTP	[5]	1222	LTP	[14,13,15]
ERBB2_HUMAN	NEAR	1212	1229	SH2	LTP	[5]	1196	LTP	[14,13,15,18,8]
ERBB2_HUMAN	NEAR	1212	1229	SH2	LTP	[5]	1248	LTP	[14,13,17,15,16,8]
ERBB2_HUMAN	INTRA	1240	1255	SH2	LTP	[5]	1248	LTP	[14,13,17,15,16,8]
ERBB2_HUMAN	NEAR	1240	1255	SH2	LTP	[5]	1221	LTP	[14,13,15]
ERBB2_HUMAN	NEAR	1240	1255	SH2	LTP	[5]	1222	LTP	[14,13,15]
ERBB2_HUMAN	INTRA	1248	1255	PDZ	LTP	[3]	1248	LTP	[14,13,17,15,16,8]
ERBB3_HUMAN	INTRA	859	877	SH2	HTP	[5]	873	LTP	[13]
ERBB3_HUMAN	INTRA	1045	1059	SH2	HTP	[1]	1054	HTP	[13,15]
ERBB3_HUMAN	INTRA	1188	1204	SH2	HTP	[1]	1199	LTP	[14,13,15,18]
ERBB3_HUMAN	INTRA	1188	1204	SH2	HTP	[1]	1197	HTP	[13,15]
ERBB3_HUMAN	NEAR	1188	1204	SH2	HTP	[1]	1222	HTP	[13]
ERBB3_HUMAN	INTRA	1191	1208	SH2	LTP	[5]	1199	LTP	[14,13,15,18]
ERBB3_HUMAN	INTRA	1191	1208	SH2	LTP	[5]	1197	HTP	[13,15]
ERBB3_HUMAN	NEAR	1191	1208	SH2	LTP	[5]	1222	HTP	[13]
ERBB3_HUMAN	NEAR	1213	1229	SH2	HTP	[5]	1199	LTP	[14,13,15,18]
ERBB3_HUMAN	INTRA	1213	1229	SH2	HTP	[5]	1222	HTP	[13]
ERBB3_HUMAN	NEAR	1213	1229	SH2	HTP	[5]	1197	HTP	[13,15]
ERBB3_HUMAN	NEAR	1216	1233	SH2	HTP	[5]	1199	LTP	[14,13,15,18]
ERBB3_HUMAN	INTRA	1216	1233	SH2	HTP	[5]	1222	HTP	[13]
ERBB3_HUMAN	NEAR	1216	1233	SH2	HTP	[5]	1197	HTP	[13,15]
ERBB3_HUMAN	INTRA	1251	1267	SH2	HTP	[5]	1262	LTP	[14,13,18]
ERBB3_HUMAN	NEAR	1251	1267	SH2	HTP	[5]	1276	LTP	[14,13,15]
ERBB3_HUMAN	INTRA	1251	1267	SH2	HTP	[5]	1260	HTP	[13]
ERBB3_HUMAN	INTRA	1254	1271	SH2	LTP	[5]	1262	LTP	[14,13,18]
ERBB3_HUMAN	NEAR	1254	1271	SH2	LTP	[5]	1276	LTP	[14,13,15]
ERBB3_HUMAN	NEAR	1254	1271	SH2	LTP	[5]	1289	LTP	[14,13,15]
ERBB3_HUMAN	INTRA	1254	1271	SH2	LTP	[5]	1260	HTP	[13]
ERBB3_HUMAN	INTRA	1267	1283	SH2	HTP	[5]	1276	LTP	[14,13,15]
ERBB3_HUMAN	NEAR	1267	1283	SH2	HTP	[5]	1262	LTP	[14,13,18]
ERBB3_HUMAN	NEAR	1267	1283	SH2	HTP	[5]	1289	LTP	[14,13,15]
ERBB3_HUMAN	NEAR	1267	1283	SH2	HTP	[5]	1260	HTP	[13]
ERBB3_HUMAN	INTRA	1281	1298	SH2	HTP	[5]	1289	LTP	[14,13,15]
ERBB3_HUMAN	NEAR	1281	1298	SH2	HTP	[5]	1262	LTP	[14,13,18]
ERBB3_HUMAN	NEAR	1281	1298	SH2	HTP	[5]	1276	LTP	[14,13,15]
ERBB3_HUMAN	NEAR	1281	1298	SH2	HTP	[5]	1307	HTP	[15]
ERBB3_HUMAN	NEAR	1300	1316	SH2	HTP	[1]	1289	LTP	[14,13,15]
ERBB3_HUMAN	NEAR	1300	1316	SH2	HTP	[1]	1328	LTP	[14,13,15,8]
ERBB3_HUMAN	INTRA	1300	1316	SH2	HTP	[1]	1307	HTP	[15]
ERBB3_HUMAN	INTRA	1323	1333	SH2	HTP	[5]	1328	LTP	[14,13,15,8]
ERBB3_HUMAN	NEAR	1323	1333	SH2	HTP	[5]	1307	HTP	[15]
ERBB4_HUMAN	INTRA	728	738	SH2	HTP	[1]	733	HTP	[13,15,8]
ERBB4_HUMAN	INTRA	979	989	SH2	HTP	[1]	984	HTP	[13]
ERBB4_HUMAN	INTRA	1017	1027	SH2	HTP	[1]	1022	HTP	[13]
ERBB4_HUMAN	NEAR	1017	1027	SH2	HTP	[1]	1035	HTP	[15]
ERBB4_HUMAN	NEAR	1023	1039	WW	LTP	[5]	1056	LTP	[14,13,15]
ERBB4_HUMAN	INTRA	1023	1039	WW	LTP	[5]	1035	HTP	[15]
ERBB4_HUMAN	NEAR	1023	1039	WW	LTP	[5]	1022	HTP	[13]
ERBB4_HUMAN	INTRA	1044	1060	WW	HTP	[5]	1056	LTP	[14,13,15]
ERBB4_HUMAN	NEAR	1044	1060	WW	HTP	[5]	1035	HTP	[15]
ERBB4_HUMAN	NEAR	1044	1060	WW	HTP	[5]	1066	HTP	[15]
ERBB4_HUMAN	INTRA	1051	1061	SH2	HTP	[1]	1056	LTP	[14,13,15]
ERBB4_HUMAN	NEAR	1051	1061	SH2	HTP	[1]	1035	HTP	[15]
ERBB4_HUMAN	NEAR	1051	1061	SH2	HTP	[1]	1066	HTP	[15]
ERBB4_HUMAN	NEAR	1051	1061	SH2	HTP	[1]	1081	HTP	[15]
ERBB4_HUMAN	INTRA	1157	1167	SH2	HTP	[5]	1162	HTP	[13,15,8]
ERBB4_HUMAN	NEAR	1157	1167	SH2	HTP	[5]	1150	HTP	[15]
ERBB4_HUMAN	INTRA	1180	1197	SH2	LTP	[5]	1188	LTP	[14,13,15,8]
ERBB4_HUMAN	NEAR	1180	1197	SH2	LTP	[5]	1162	HTP	[13,15,8]
ERBB4_HUMAN	NEAR	1180	1197	SH2	LTP	[5]	1202	HTP	[13,15]
ERBB4_HUMAN	NEAR	1180	1197	SH2	LTP	[5]	1208	HTP	[13,15]
ERBB4_HUMAN	NEAR	1197	1207	SH2	HTP	[1]	1188	LTP	[14,13,15,8]
ERBB4_HUMAN	INTRA	1197	1207	SH2	HTP	[1]	1202	HTP	[13,15]
ERBB4_HUMAN	NEAR	1197	1207	SH2	HTP	[1]	1208	HTP	[13,15]
ERBB4_HUMAN	NEAR	1197	1207	SH2	HTP	[1]	1221	HTP	[13,15]
ERBB4_HUMAN	NEAR	1203	1213	SH2	HTP	[1]	1188	LTP	[14,13,15,8]
ERBB4_HUMAN	INTRA	1203	1213	SH2	HTP	[1]	1208	HTP	[13,15]
ERBB4_HUMAN	NEAR	1203	1213	SH2	HTP	[1]	1202	HTP	[13,15]
ERBB4_HUMAN	NEAR	1203	1213	SH2	HTP	[1]	1221	HTP	[13,15]
ERBB4_HUMAN	NEAR	1216	1226	SH2	HTP	[1]	1242	LTP	[14,13,15]
ERBB4_HUMAN	INTRA	1216	1226	SH2	HTP	[1]	1221	HTP	[13,15]
ERBB4_HUMAN	NEAR	1216	1226	SH2	HTP	[1]	1202	HTP	[13,15]
ERBB4_HUMAN	NEAR	1216	1226	SH2	HTP	[1]	1208	HTP	[13,15]
ERBB4_HUMAN	INTRA	1234	1251	SH2	LTP	[5]	1242	LTP	[14,13,15]
ERBB4_HUMAN	NEAR	1234	1251	SH2	LTP	[5]	1221	HTP	[13,15]
ERBB4_HUMAN	NEAR	1234	1251	SH2	LTP	[5]	1258	HTP	[15,8]
ERBB4_HUMAN	NEAR	1234	1251	SH2	LTP	[5]	1262	HTP	[15]
ERBB4_HUMAN	NEAR	1234	1251	SH2	LTP	[5]	1266	HTP	[15]
ERBB4_HUMAN	NEAR	1234	1251	SH2	LTP	[5]	1268	HTP	[13,15]
ERBB4_HUMAN	NEAR	1249	1265	SH2	HTP	[5]	1242	LTP	[14,13,15]
ERBB4_HUMAN	NEAR	1249	1265	SH2	HTP	[5]	1284	LTP	[14,13,15,8]
ERBB4_HUMAN	INTRA	1249	1265	SH2	HTP	[5]	1258	HTP	[15,8]
ERBB4_HUMAN	INTRA	1249	1265	SH2	HTP	[5]	1262	HTP	[15]
ERBB4_HUMAN	NEAR	1249	1265	SH2	HTP	[5]	1266	HTP	[15]
ERBB4_HUMAN	NEAR	1249	1265	SH2	HTP	[5]	1268	HTP	[13,15]
ERBB4_HUMAN	NEAR	1261	1273	SH2	HTP	[1]	1242	LTP	[14,13,15]
ERBB4_HUMAN	NEAR	1261	1273	SH2	HTP	[1]	1284	LTP	[14,13,15,8]
ERBB4_HUMAN	INTRA	1261	1273	SH2	HTP	[1]	1262	HTP	[15]
ERBB4_HUMAN	INTRA	1261	1273	SH2	HTP	[1]	1266	HTP	[15]
ERBB4_HUMAN	INTRA	1261	1273	SH2	HTP	[1]	1268	HTP	[13,15]
ERBB4_HUMAN	NEAR	1261	1273	SH2	HTP	[1]	1258	HTP	[15,8]
ERBB4_HUMAN	INTRA	1279	1289	SH2	HTP	[5]	1284	LTP	[14,13,15,8]
ERBB4_HUMAN	NEAR	1279	1289	SH2	HTP	[5]	1262	HTP	[15]
ERBB4_HUMAN	NEAR	1279	1289	SH2	HTP	[5]	1266	HTP	[15]
ERBB4_HUMAN	NEAR	1279	1289	SH2	HTP	[5]	1268	HTP	[13,15]
ERBB4_HUMAN	NEAR	1279	1289	SH2	HTP	[5]	1301	HTP	[15]
ERBB4_HUMAN	NEAR	1289	1305	WW	LTP	[5]	1284	LTP	[14,13,15,8]
ERBB4_HUMAN	INTRA	1289	1305	WW	LTP	[5]	1301	HTP	[15]
ERBB4_HUMAN	NEAR	1298	1308	PDZ	LTP	[3]	1284	LTP	[14,13,15,8]
ERBB4_HUMAN	INTRA	1298	1308	PDZ	LTP	[3]	1301	HTP	[15]
ERF_HUMAN	INTRA	518	535	WW	HTP	[5]	531	mHTP	[14,13,17,15,16,8]
ERF_HUMAN	INTRA	518	535	WW	HTP	[5]	526	LTP	[14,13,15,8]
ERF_HUMAN	NEAR	518	535	WW	HTP	[5]	548	HTP	[15,8]
ESR1_HUMAN	INTRA	529	546	SH2	HTP	[5]	537	LTP	[14,13,15,8]
ESR1_HUMAN	NEAR	529	546	SH2	HTP	[5]	559	LTP	[15]
ETS1_HUMAN	INTRA	30	47	WW	HTP	[5]	38	LTP	[14,13,15,18,8]
ETV6_HUMAN	INTRA	306	323	SH2	LTP	[5]	314	LTP	[15]
ETV6_HUMAN	INTRA	306	323	SH2	LTP	[5]	307	HTP	[15]
EZRI_HUMAN	INTRA	346	363	SH2	HTP	[5]	354	LTP	[14,13,15,8]
EZRI_HUMAN	INTRA	466	482	WW	LTP	[5]	478	LTP	[14,15]
EZRI_HUMAN	INTRA	476	481	SH2	HTP	[1]	478	LTP	[14,15]
F125A_HUMAN	NEAR	155	160	SH3	LTP	[8]	170	mHTP	[17,15,8]
F125A_HUMAN	NEAR	155	160	SH3	LTP	[8]	163	LTP	[8]
FAK1_HUMAN	INTRA	389	406	SH2	LTP	[5]	397	LTP	[14,15,18,8]
FAK1_HUMAN	NEAR	389	406	SH2	LTP	[5]	407	LTP	[14,15,18,8]
FAK1_HUMAN	INTRA	389	406	SH2	LTP	[5]	390	HTP	[15]
FAK1_HUMAN	INTRA	389	406	SH2	LTP	[5]	392	HTP	[17,15]
FAK1_HUMAN	INTRA	389	406	SH2	LTP	[5]	394	HTP	[15]
FAK1_HUMAN	INTRA	389	406	SH2	LTP	[5]	406	HTP	[15]
FAK1_HUMAN	NEAR	389	406	SH2	LTP	[5]	386	HTP	[17,15]
FAK1_HUMAN	NEAR	389	406	SH2	LTP	[5]	408	HTP	[16]
FAK1_HUMAN	INTRA	917	934	SH2	LTP	[5]	925	LTP	[14,15,18,8]
FAK1_HUMAN	NEAR	917	934	SH2	LTP	[5]	910	LTP	[14,17,15,8]
FAK2_HUMAN	INTRA	402	405	SH2	LTP	[5]	402	LTP	[14,13,15,18,8]
FAK2_HUMAN	NEAR	402	405	SH2	LTP	[5]	389	HTP	[17,15]
FAK2_HUMAN	NEAR	402	405	SH2	LTP	[5]	392	HTP	[15]
FAK2_HUMAN	NEAR	402	405	SH2	LTP	[5]	394	HTP	[17,15]
FAK2_HUMAN	NEAR	402	405	SH2	LTP	[5]	396	HTP	[15]
FAK2_HUMAN	NEAR	402	405	SH2	LTP	[5]	399	HTP	[17,15,8]
FAK2_HUMAN	NEAR	402	405	SH2	LTP	[5]	409	HTP	[15]
FAK2_HUMAN	INTRA	881	884	SH2	LTP	[4]	881	LTP	[14,13,15,8]
FAK2_HUMAN	NEAR	881	884	SH2	LTP	[4]	866	HTP	[15]
FANCG_HUMAN	INTRA	380	394	SH3	HTP	[1]	383	LTP	[13,15]
FANCG_HUMAN	INTRA	380	394	SH3	HTP	[1]	387	LTP	[14,13,15]
FCERB_HUMAN	INTRA	211	228	SH2	HTP	[5]	219	LTP	[14,15,8]
FCERB_HUMAN	NEAR	221	238	SH2	HTP	[5]	219	LTP	[14,15,8]
FCERG_HUMAN	INTRA	57	74	SH2	HTP	[5]	65	mHTP	[14,13,15,8]
FCERG_HUMAN	NEAR	57	74	SH2	HTP	[5]	76	mHTP	[14,13,15,8]
FCERG_HUMAN	INTRA	68	85	SH2	HTP	[5]	76	mHTP	[14,13,15,8]
FCERG_HUMAN	NEAR	68	85	SH2	HTP	[5]	65	mHTP	[14,13,15,8]
FCG2A_HUMAN	INTRA	279	296	SH2	LTP	[5]	281	LTP	[14,15,18]
FCG2A_HUMAN	INTRA	279	296	SH2	LTP	[5]	288	LTP	[14,15,8]
FCG2A_HUMAN	NEAR	279	296	SH2	LTP	[5]	304	LTP	[14,15]
FCG2A_HUMAN	INTRA	295	312	SH2	LTP	[5]	304	LTP	[14,15]
FCG2A_HUMAN	NEAR	295	312	SH2	LTP	[5]	281	LTP	[14,15,18]
FCG2A_HUMAN	NEAR	295	312	SH2	LTP	[5]	288	LTP	[14,15,8]
FCG2B_HUMAN	INTRA	284	301	SH2	HTP	[5]	292	LTP	[14,13,15]
FETUA_HUMAN	NEAR	352	365	SH3	HTP	[1]	334	HTP	[8]
FGFR1_HUMAN	NEAR	548	565	SH2	HTP	[5]	583	LTP	[14,15]
FGFR1_HUMAN	NEAR	548	565	SH2	HTP	[5]	585	LTP	[14,15]
FGFR1_HUMAN	INTRA	720	737	SH2	HTP	[5]	730	LTP	[14,15,18]
FGFR1_HUMAN	INTRA	758	775	SH2	LTP	[5]	766	LTP	[14,15,8]
FGFR1_HUMAN	NEAR	758	775	SH2	LTP	[5]	777	LTP	[15]
FGFR1_HUMAN	INTRA	768	785	SH2	LTP	[5]	777	LTP	[15]
FGFR1_HUMAN	NEAR	768	785	SH2	LTP	[5]	766	LTP	[14,15,8]
FLNB_HUMAN	NEAR	240	253	SH3	HTP	[1]	267	HTP	[15]
FOS_HUMAN	INTRA	224	241	WW	LTP	[5]	232	LTP	[14,13,15,18,8]
FOS_HUMAN	INTRA	317	334	WW	LTP	[5]	325	LTP	[14,13,15,18,8]
FOS_HUMAN	INTRA	317	334	WW	LTP	[5]	331	LTP	[14,13,18,8]
FOS_HUMAN	NEAR	317	334	WW	LTP	[5]	308	LTP	[15]
FOS_HUMAN	INTRA	323	340	WW	LTP	[5]	325	LTP	[14,13,15,18,8]
FOS_HUMAN	INTRA	323	340	WW	LTP	[5]	331	LTP	[14,13,18,8]
FOS_HUMAN	NEAR	323	340	WW	LTP	[5]	308	LTP	[15]
FOS_HUMAN	INTRA	366	380	WW	LTP	[5]	374	LTP	[14,13,17,18,8]
FOS_HUMAN	NEAR	366	380	WW	LTP	[5]	362	LTP	[14,13,17,15,18,8]
FOS_HUMAN	INTRA	366	380	WW	LTP	[5]	376	HTP	[15]
FRS2_HUMAN	INTRA	298	315	SH2	LTP	[5]	300	HTP	[16]
FRS2_HUMAN	NEAR	298	315	SH2	LTP	[5]	279	HTP	[16]
FRS2_HUMAN	NEAR	298	315	SH2	LTP	[5]	284	HTP	[16]
FRS2_HUMAN	NEAR	298	315	SH2	LTP	[5]	316	HTP	[17]
FRS2_HUMAN	INTRA	463	480	SH2	LTP	[5]	468	HTP	[17]
FRS2_HUMAN	INTRA	463	480	SH2	LTP	[5]	479	HTP	[17]
FRS2_HUMAN	NEAR	463	480	SH2	LTP	[5]	483	HTP	[17]
FRS3_HUMAN	INTRA	409	426	SH2	LTP	[5]	417	LTP	[13]
FRS3_HUMAN	INTRA	447	464	SH2	LTP	[5]	455	LTP	[13]
FYB_HUMAN	NEAR	551	568	SH2	LTP	[5]	571	mHTP	[14,13,15,8]
FYB_HUMAN	NEAR	551	568	SH2	LTP	[5]	573	mHTP	[14,13,15,8]
FYB_HUMAN	NEAR	587	604	SH2	LTP	[5]	571	mHTP	[14,13,15,8]
FYB_HUMAN	NEAR	587	604	SH2	LTP	[5]	573	mHTP	[14,13,15,8]
FYB_HUMAN	INTRA	587	604	SH2	LTP	[5]	595	LTP	[14,13,15,18]
FYB_HUMAN	NEAR	617	634	SH2	HTP	[5]	651	LTP	[14,15,18,8]
FYB_HUMAN	INTRA	643	660	SH2	LTP	[5]	651	LTP	[14,15,18,8]
FYN_HUMAN	INTRA	523	537	SH2	LTP	[5]	531	LTP	[14,13,15,8]
FYN_HUMAN	INTRA	523	537	SH2	LTP	[5]	525	HTP	[15]
FYN_HUMAN	NEAR	523	537	SH2	LTP	[5]	512	HTP	[15]
FYN_HUMAN	NEAR	523	537	SH2	LTP	[5]	518	HTP	[17]
FYN_HUMAN	INTRA	531	534	SH2	LTP	[4]	531	LTP	[14,13,15,8]
FYN_HUMAN	NEAR	531	534	SH2	LTP	[4]	512	HTP	[15]
FYN_HUMAN	NEAR	531	534	SH2	LTP	[4]	518	HTP	[17]
FYN_HUMAN	NEAR	531	534	SH2	LTP	[4]	525	HTP	[15]
G6B_HUMAN	INTRA	203	220	SH2	LTP	[5]	211	LTP	[13,15,8]
G6B_HUMAN	NEAR	203	220	SH2	LTP	[5]	237	LTP	[15]
G6B_HUMAN	NEAR	203	220	SH2	LTP	[5]	226	HTP	[14,15,8]
G6B_HUMAN	NEAR	203	220	SH2	LTP	[5]	227	HTP	[14,15,8]
GAB1_HUMAN	INTRA	175	192	SH2	HTP	[5]	183	HTP	[8]
GAB1_HUMAN	NEAR	234	251	SH2	LTP	[5]	259	mHTP	[14,13,15,8]
GAB1_HUMAN	INTRA	234	251	SH2	LTP	[5]	242	LTP	[14,13,15]
GAB1_HUMAN	NEAR	234	251	SH2	LTP	[5]	266	HTP	[14,13,15,8]
GAB1_HUMAN	INTRA	251	268	SH2	LTP	[5]	259	mHTP	[14,13,15,8]
GAB1_HUMAN	NEAR	251	268	SH2	LTP	[5]	242	LTP	[14,13,15]
GAB1_HUMAN	NEAR	251	268	SH2	LTP	[5]	285	LTP	[14,13,15]
GAB1_HUMAN	INTRA	251	268	SH2	LTP	[5]	266	HTP	[14,13,15,8]
GAB1_HUMAN	INTRA	299	316	SH2	LTP	[5]	307	LTP	[14,13,15,18]
GAB1_HUMAN	INTRA	299	316	SH2	LTP	[5]	312	LTP	[13]
GAB1_HUMAN	NEAR	299	316	SH2	LTP	[5]	285	LTP	[14,13,15]
GAB1_HUMAN	NEAR	299	316	SH2	LTP	[5]	317	LTP	[14,15]
GAB1_HUMAN	INTRA	309	326	SH2	LTP	[5]	312	LTP	[13]
GAB1_HUMAN	INTRA	309	326	SH2	LTP	[5]	317	LTP	[14,15]
GAB1_HUMAN	NEAR	309	326	SH2	LTP	[5]	307	LTP	[14,13,15,18]
GAB1_HUMAN	INTRA	365	382	SH2	LTP	[5]	373	LTP	[14,13,15,8]
GAB1_HUMAN	INTRA	365	382	SH2	LTP	[5]	381	LTP	[13]
GAB1_HUMAN	NEAR	365	382	SH2	LTP	[5]	355	HTP	[15]
GAB1_HUMAN	INTRA	398	415	SH2	LTP	[5]	406	LTP	[14,13,15,8]
GAB1_HUMAN	NEAR	398	415	SH2	LTP	[5]	381	LTP	[13]
GAB1_HUMAN	NEAR	398	415	SH2	LTP	[5]	418	HTP	[15]
GAB1_HUMAN	NEAR	398	415	SH2	LTP	[5]	419	HTP	[15]
GAB1_HUMAN	INTRA	439	456	SH2	LTP	[5]	447	LTP	[14,13,15,18]
GAB1_HUMAN	INTRA	439	456	SH2	LTP	[5]	454	LTP	[13]
GAB1_HUMAN	NEAR	439	456	SH2	LTP	[5]	472	LTP	[14,13,15]
GAB1_HUMAN	NEAR	439	456	SH2	LTP	[5]	476	LTP	[14,13,15]
GAB1_HUMAN	NEAR	439	456	SH2	LTP	[5]	419	HTP	[15]
GAB1_HUMAN	INTRA	464	481	SH2	LTP	[5]	472	LTP	[14,13,15]
GAB1_HUMAN	INTRA	464	481	SH2	LTP	[5]	476	LTP	[14,13,15]
GAB1_HUMAN	NEAR	464	481	SH2	LTP	[5]	447	LTP	[14,13,15,18]
GAB1_HUMAN	NEAR	464	481	SH2	LTP	[5]	454	LTP	[13]
GAB1_HUMAN	INTRA	581	598	SH2	LTP	[5]	589	LTP	[14,15,18]
GAB1_HUMAN	INTRA	581	598	SH2	LTP	[5]	597	LTP	[13]
GAB1_HUMAN	INTRA	619	637	SH2	LTP	[5]	627	LTP	[14,15,8]
GAB1_HUMAN	INTRA	651	668	SH2	LTP	[5]	659	LTP	[14,15,8]
GAB2_HUMAN	NEAR	351	358	SH3	LTP	[1]	331	LTP	[15,8]
GAB2_HUMAN	INTRA	606	623	SH2	LTP	[5]	614	LTP	[14,13,15]
GAB2_HUMAN	INTRA	606	623	SH2	LTP	[5]	622	LTP	[15,8]
GAB2_HUMAN	INTRA	606	623	SH2	LTP	[5]	623	LTP	[14,13,15,8]
GAB2_HUMAN	NEAR	606	623	SH2	LTP	[5]	643	LTP	[14,15]
GAB2_HUMAN	INTRA	635	652	SH2	LTP	[5]	643	LTP	[14,15]
GAB2_HUMAN	NEAR	635	652	SH2	LTP	[5]	622	LTP	[15,8]
GAB2_HUMAN	NEAR	635	652	SH2	LTP	[5]	623	LTP	[14,13,15,8]
GASR_HUMAN	NEAR	404	416	SH3	HTP	[1]	434	LTP	[15]
GASR_HUMAN	INTRA	430	447	SH2	LTP	[5]	434	LTP	[15]
GASR_HUMAN	INTRA	430	447	SH2	LTP	[5]	438	LTP	[15]
GASR_HUMAN	INTRA	430	447	SH2	LTP	[5]	439	LTP	[15]
GCF_HUMAN	NEAR	111	124	SH3	HTP	[1]	96	mHTP	[14,13,17,16,8]
GCF_HUMAN	NEAR	111	124	SH3	HTP	[1]	97	mHTP	[14,13,17,16,8]
GCF_HUMAN	INTRA	111	124	SH3	HTP	[1]	119	HTP	[8]
GCYB1_HUMAN	INTRA	184	201	SH2	LTP	[5]	192	LTP	[15]
GHR_HUMAN	INTRA	479	496	SH2	LTP	[5]	487	LTP	[14,13]
GHR_HUMAN	INTRA	534	537	SH2	LTP	[4]	534	LTP	[14,13]
GHR_HUMAN	NEAR	539	551	SH3	HTP	[1]	534	LTP	[14,13]
GHR_HUMAN	NEAR	539	551	SH3	HTP	[1]	566	LTP	[14,13,18]
GHR_HUMAN	INTRA	566	569	SH2	LTP	[4]	566	LTP	[14,13,18]
GHR_HUMAN	INTRA	627	630	SH2	LTP	[4]	627	LTP	[14,13]
GLPC_HUMAN	NEAR	118	128	PDZ	LTP	[1]	104	HTP	[8]
GRB10_HUMAN	INTRA	59	76	SH2	LTP	[5]	67	LTP	[14,13,15,18,8]
GRLF1_HUMAN	INTRA	1079	1096	SH2	LTP	[5]	1087	mHTP	[13,15,8]
GRLF1_HUMAN	NEAR	1079	1096	SH2	LTP	[5]	1105	LTP	[14,13,17,15,8]
GRLF1_HUMAN	NEAR	1079	1096	SH2	LTP	[5]	1070	HTP	[17,15]
GRLF1_HUMAN	NEAR	1079	1096	SH2	LTP	[5]	1072	HTP	[15,19,8]
GRLF1_HUMAN	NEAR	1079	1096	SH2	LTP	[5]	1073	HTP	[15]
GRLF1_HUMAN	NEAR	1079	1096	SH2	LTP	[5]	1074	HTP	[15]
GRLF1_HUMAN	NEAR	1097	1114	SH2	LTP	[5]	1087	mHTP	[13,15,8]
GRLF1_HUMAN	NEAR	1097	1114	SH2	LTP	[5]	1134	mHTP	[14,13,15,18,8]
GRLF1_HUMAN	INTRA	1097	1114	SH2	LTP	[5]	1105	LTP	[14,13,17,15,8]
GRLF1_HUMAN	NEAR	1097	1114	SH2	LTP	[5]	1127	HTP	[15]
H14_HUMAN	INTRA	178	190	SH3	HTP	[1]	187	LTP	[14,13,17,8]
H14_HUMAN	NEAR	178	190	SH3	HTP	[1]	172	LTP	[14,13,17]
HCLS1_HUMAN	INTRA	389	406	SH2	HTP	[5]	397	LTP	[14,13,15,18]
HCLS1_HUMAN	NEAR	389	406	SH2	HTP	[5]	378	LTP	[14,13,15,18]
HCN2_HUMAN	NEAR	802	815	SH3	HTP	[1]	792	HTP	[15]
HCN2_HUMAN	NEAR	802	815	SH3	HTP	[1]	795	HTP	[15]
HNRPK_HUMAN	NEAR	308	318	SH3	LTP	[12]	302	LTP	[14,13,15,18]
HNRPK_HUMAN	NEAR	308	318	SH3	LTP	[12]	323	HTP	[15]
I12R2_HUMAN	INTRA	792	809	SH2	LTP	[5]	800	LTP	[8]
IGF1R_HUMAN	INTRA	965	982	SH2	LTP	[5]	973	LTP	[14,13,15,18]
IGF1R_HUMAN	INTRA	965	982	SH2	LTP	[5]	980	LTP	[14,13,15,18,8]
IGF1R_HUMAN	INTRA	965	982	SH2	LTP	[5]	982	LTP	[15]
IGF1R_HUMAN	INTRA	972	989	SH2	LTP	[5]	973	LTP	[14,13,15,18]
IGF1R_HUMAN	INTRA	972	989	SH2	LTP	[5]	980	LTP	[14,13,15,18,8]
IGF1R_HUMAN	INTRA	972	989	SH2	LTP	[5]	982	LTP	[15]
IGF1R_HUMAN	INTRA	979	996	SH2	LTP	[5]	980	LTP	[14,13,15,18,8]
IGF1R_HUMAN	INTRA	979	996	SH2	LTP	[5]	982	LTP	[15]
IGF1R_HUMAN	NEAR	979	996	SH2	LTP	[5]	973	LTP	[14,13,15,18]
IGF1R_HUMAN	INTRA	1338	1355	SH2	LTP	[5]	1339	mHTP	[17,15,20,8]
IGF1R_HUMAN	NEAR	1338	1355	SH2	LTP	[5]	1366	mHTP	[17,15,20,8]
IGF1R_HUMAN	INTRA	1338	1355	SH2	LTP	[5]	1346	LTP	[14,13,15,18]
IGF1R_HUMAN	NEAR	1338	1355	SH2	LTP	[5]	1364	HTP	[17,15]
IGF1R_HUMAN	NEAR	1338	1355	SH2	LTP	[5]	1365	HTP	[15,20]
IGF1R_HUMAN	INTRA	1357	1367	PDZ	LTP	[3]	1366	mHTP	[17,15,20,8]
IGF1R_HUMAN	NEAR	1357	1367	PDZ	LTP	[3]	1339	mHTP	[17,15,20,8]
IGF1R_HUMAN	NEAR	1357	1367	PDZ	LTP	[3]	1346	LTP	[14,13,15,18]
IGF1R_HUMAN	INTRA	1357	1367	PDZ	LTP	[3]	1364	HTP	[17,15]
IGF1R_HUMAN	INTRA	1357	1367	PDZ	LTP	[3]	1365	HTP	[15,20]
IKBA_HUMAN	INTRA	34	51	SH2	HTP	[5]	36	LTP	[14,13,15,18,8]
IKBA_HUMAN	INTRA	34	51	SH2	HTP	[5]	42	LTP	[14,13,15,18,8]
IKBA_HUMAN	NEAR	34	51	SH2	HTP	[5]	32	LTP	[14,13,15,18,8]
IL2RB_HUMAN	INTRA	418	421	SH2	LTP	[5]	418	LTP	[14,13,15,18]
IL2RB_HUMAN	INTRA	528	545	SH2	LTP	[5]	536	LTP	[14,13,15]
IL3RB_HUMAN	INTRA	628	631	SH2	LTP	[4]	628	LTP	[14,13,15]
IL3RB_HUMAN	INTRA	766	769	SH2	LTP	[4]	766	LTP	[14,13,15,8]
IL4RA_HUMAN	INTRA	489	506	SH2	LTP	[5]	497	LTP	[14,13,15,8]
IL4RA_HUMAN	INTRA	567	584	SH2	LTP	[5]	575	LTP	[14,13,8]
IL4RA_HUMAN	NEAR	567	584	SH2	LTP	[5]	603	LTP	[14,13,8]
IL4RA_HUMAN	INTRA	602	606	SH2	LTP	[4]	603	LTP	[14,13,8]
IL4RA_HUMAN	INTRA	623	640	SH2	HTP	[5]	631	LTP	[14,13,8]
IL4RA_HUMAN	NEAR	623	640	SH2	HTP	[5]	603	LTP	[14,13,8]
IL4RA_HUMAN	INTRA	705	722	SH2	LTP	[5]	713	LTP	[14,13,15]
IL6RB_HUMAN	INTRA	751	768	SH2	LTP	[5]	759	LTP	[14,15]
IL6RB_HUMAN	INTRA	751	768	SH2	LTP	[5]	767	LTP	[14,15]
IL6RB_HUMAN	NEAR	751	768	SH2	LTP	[5]	782	LTP	[14,13,15,8]
IL6RB_HUMAN	NEAR	751	768	SH2	LTP	[5]	780	HTP	[15]
IL6RB_HUMAN	NEAR	751	768	SH2	LTP	[5]	783	HTP	[15]
IL6RB_HUMAN	INTRA	767	770	SH2	LTP	[4]	767	LTP	[14,15]
IL6RB_HUMAN	NEAR	767	770	SH2	LTP	[4]	759	LTP	[14,15]
IL6RB_HUMAN	NEAR	767	770	SH2	LTP	[4]	782	LTP	[14,13,15,8]
IL6RB_HUMAN	NEAR	767	770	SH2	LTP	[4]	780	HTP	[15]
IL6RB_HUMAN	NEAR	767	770	SH2	LTP	[4]	783	HTP	[15]
IL6RB_HUMAN	NEAR	814	817	SH2	LTP	[4]	820	mHTP	[14,13,17,16,8]
IL6RB_HUMAN	INTRA	814	817	SH2	LTP	[4]	814	LTP	[14,15]
IL6RB_HUMAN	NEAR	814	817	SH2	LTP	[4]	825	HTP	[17]
IL6RB_HUMAN	NEAR	814	817	SH2	LTP	[4]	829	HTP	[14,13,17,16,8]
IL6RB_HUMAN	INTRA	905	908	SH2	LTP	[4]	905	LTP	[14,15]
IL6RB_HUMAN	NEAR	905	908	SH2	LTP	[4]	890	LTP	[14,13,15]
IL6RB_HUMAN	NEAR	905	908	SH2	LTP	[4]	909	LTP	[13]
IL6RB_HUMAN	NEAR	905	908	SH2	LTP	[4]	915	LTP	[14,15]
IL6RB_HUMAN	INTRA	915	918	SH2	LTP	[4]	915	LTP	[14,15]
IL6RB_HUMAN	NEAR	915	918	SH2	LTP	[4]	905	LTP	[14,15]
IL6RB_HUMAN	NEAR	915	918	SH2	LTP	[4]	909	LTP	[13]
IL7RA_HUMAN	INTRA	449	452	SH2	LTP	[4]	449	LTP	[14,13,15]
IL9R_HUMAN	INTRA	407	410	SH2	LTP	[4]	407	LTP	[14,13]
INAR1_HUMAN	INTRA	458	475	SH2	LTP	[5]	466	LTP	[14,13,15,8]
INAR1_HUMAN	NEAR	458	475	SH2	LTP	[5]	481	LTP	[14,13,15,18,8]
INAR1_HUMAN	NEAR	458	475	SH2	LTP	[5]	495	LTP	[14,13,15,18,8]
INAR1_HUMAN	NEAR	458	475	SH2	LTP	[5]	494	HTP	[8]
INAR1_HUMAN	INTRA	473	490	SH2	HTP	[5]	481	LTP	[14,13,15,18,8]
INAR1_HUMAN	NEAR	473	490	SH2	HTP	[5]	466	LTP	[14,13,15,8]
INAR1_HUMAN	NEAR	473	490	SH2	HTP	[5]	495	LTP	[14,13,15,18,8]
INAR1_HUMAN	NEAR	473	490	SH2	HTP	[5]	494	HTP	[8]
INGR1_HUMAN	INTRA	449	466	SH2	LTP	[5]	457	LTP	[14,13,15]
INSR_HUMAN	INTRA	984	1001	SH2	HTP	[5]	992	LTP	[14,13,15,8]
INSR_HUMAN	INTRA	984	1001	SH2	HTP	[5]	999	LTP	[14,13,15,18,8]
INSR_HUMAN	NEAR	984	1001	SH2	HTP	[5]	1011	LTP	[14,15,8]
INSR_HUMAN	INTRA	991	1008	SH2	LTP	[5]	992	LTP	[14,13,15,8]
INSR_HUMAN	INTRA	991	1008	SH2	LTP	[5]	999	LTP	[14,13,15,18,8]
INSR_HUMAN	NEAR	991	1008	SH2	LTP	[5]	1011	LTP	[14,15,8]
INSR_HUMAN	INTRA	1003	1020	SH2	HTP	[5]	1011	LTP	[14,15,8]
INSR_HUMAN	NEAR	1003	1020	SH2	HTP	[5]	1033	LTP	[15]
INSR_HUMAN	NEAR	1003	1020	SH2	HTP	[5]	992	LTP	[14,13,15,8]
INSR_HUMAN	NEAR	1003	1020	SH2	HTP	[5]	999	LTP	[14,13,15,18,8]
INSR_HUMAN	INTRA	1141	1158	SH2	HTP	[5]	1149	LTP	[15]
INSR_HUMAN	INTRA	1177	1194	SH2	LTP	[5]	1185	LTP	[14,13,15,18,8]
INSR_HUMAN	INTRA	1177	1194	SH2	LTP	[5]	1189	LTP	[14,13,15,18,8]
INSR_HUMAN	INTRA	1177	1194	SH2	LTP	[5]	1190	LTP	[14,13,15,18,8]
INSR_HUMAN	INTRA	1181	1198	SH2	LTP	[5]	1185	LTP	[14,13,15,18,8]
INSR_HUMAN	INTRA	1181	1198	SH2	LTP	[5]	1189	LTP	[14,13,15,18,8]
INSR_HUMAN	INTRA	1181	1198	SH2	LTP	[5]	1190	LTP	[14,13,15,18,8]
INSR_HUMAN	NEAR	1181	1198	SH2	LTP	[5]	1216	LTP	[15]
INSR_HUMAN	NEAR	1181	1198	SH2	LTP	[5]	1217	LTP	[15]
INSR_HUMAN	INTRA	1182	1199	SH2	LTP	[5]	1185	LTP	[14,13,15,18,8]
INSR_HUMAN	INTRA	1182	1199	SH2	LTP	[5]	1189	LTP	[14,13,15,18,8]
INSR_HUMAN	INTRA	1182	1199	SH2	LTP	[5]	1190	LTP	[14,13,15,18,8]
INSR_HUMAN	NEAR	1182	1199	SH2	LTP	[5]	1216	LTP	[15]
INSR_HUMAN	NEAR	1182	1199	SH2	LTP	[5]	1217	LTP	[15]
INSR_HUMAN	NEAR	1229	1246	SH2	HTP	[5]	1216	LTP	[15]
INSR_HUMAN	NEAR	1229	1246	SH2	HTP	[5]	1217	LTP	[15]
INSR_HUMAN	NEAR	1229	1246	SH2	HTP	[5]	1221	LTP	[15]
INSR_HUMAN	INTRA	1347	1364	SH2	LTP	[5]	1348	LTP	[14,13,15]
INSR_HUMAN	INTRA	1347	1364	SH2	LTP	[5]	1354	LTP	[14,13,17,15,18,8]
INSR_HUMAN	INTRA	1347	1364	SH2	LTP	[5]	1355	LTP	[14,13,15,18,8]
INSR_HUMAN	INTRA	1347	1364	SH2	LTP	[5]	1361	LTP	[14,13,15,18,8]
INSR_HUMAN	INTRA	1347	1364	SH2	LTP	[5]	1362	LTP	[13]
INSR_HUMAN	NEAR	1347	1364	SH2	LTP	[5]	1332	LTP	[14,15]
INSR_HUMAN	NEAR	1347	1364	SH2	LTP	[5]	1333	LTP	[14,15]
INSR_HUMAN	NEAR	1347	1364	SH2	LTP	[5]	1375	LTP	[14,13,15,18]
INSR_HUMAN	NEAR	1347	1364	SH2	LTP	[5]	1379	HTP	[15]
INSR_HUMAN	INTRA	1353	1370	SH2	LTP	[5]	1354	LTP	[14,13,17,15,18,8]
INSR_HUMAN	INTRA	1353	1370	SH2	LTP	[5]	1355	LTP	[14,13,15,18,8]
INSR_HUMAN	INTRA	1353	1370	SH2	LTP	[5]	1361	LTP	[14,13,15,18,8]
INSR_HUMAN	INTRA	1353	1370	SH2	LTP	[5]	1362	LTP	[13]
INSR_HUMAN	NEAR	1353	1370	SH2	LTP	[5]	1333	LTP	[14,15]
INSR_HUMAN	NEAR	1353	1370	SH2	LTP	[5]	1348	LTP	[14,13,15]
INSR_HUMAN	NEAR	1353	1370	SH2	LTP	[5]	1375	LTP	[14,13,15,18]
INSR_HUMAN	NEAR	1353	1370	SH2	LTP	[5]	1379	HTP	[15]
IRS1_HUMAN	INTRA	39	56	SH2	HTP	[5]	46	mHTP	[14,13,15,8]
IRS1_HUMAN	NEAR	39	56	SH2	HTP	[5]	24	LTP	[14,13,15,18]
IRS1_HUMAN	NEAR	457	474	SH2	HTP	[5]	441	HTP	[17]
IRS1_HUMAN	NEAR	457	474	SH2	HTP	[5]	446	HTP	[15]
IRS1_HUMAN	NEAR	543	560	SH2	HTP	[5]	527	LTP	[14,13,15,18]
IRS1_HUMAN	NEAR	543	560	SH2	HTP	[5]	530	LTP	[14,15]
IRS1_HUMAN	NEAR	543	560	SH2	HTP	[5]	531	LTP	[14,13,15,18,8]
IRS1_HUMAN	NEAR	543	560	SH2	HTP	[5]	574	LTP	[14,13,15]
IRS1_HUMAN	INTRA	604	621	SH2	LTP	[5]	612	LTP	[14,13,15,8]
IRS1_HUMAN	INTRA	604	621	SH2	LTP	[5]	616	LTP	[14,13,15]
IRS1_HUMAN	NEAR	604	621	SH2	LTP	[5]	629	LTP	[14,13,17,15,16,8]
IRS1_HUMAN	NEAR	604	621	SH2	LTP	[5]	632	LTP	[14,13,15,8]
IRS1_HUMAN	NEAR	604	621	SH2	LTP	[5]	636	LTP	[14,13,17,15,16,8]
IRS1_HUMAN	NEAR	604	621	SH2	LTP	[5]	639	LTP	[14,15]
IRS1_HUMAN	INTRA	624	641	SH2	LTP	[5]	629	LTP	[14,13,17,15,16,8]
IRS1_HUMAN	INTRA	624	641	SH2	LTP	[5]	632	LTP	[14,13,15,8]
IRS1_HUMAN	INTRA	624	641	SH2	LTP	[5]	636	LTP	[14,13,17,15,16,8]
IRS1_HUMAN	INTRA	624	641	SH2	LTP	[5]	639	LTP	[14,15]
IRS1_HUMAN	NEAR	624	641	SH2	LTP	[5]	612	LTP	[14,13,15,8]
IRS1_HUMAN	NEAR	624	641	SH2	LTP	[5]	616	LTP	[14,13,15]
IRS1_HUMAN	INTRA	654	671	SH2	HTP	[5]	662	LTP	[14,13,15,18,8]
IRS1_HUMAN	INTRA	654	671	SH2	HTP	[5]	666	LTP	[13]
IRS1_HUMAN	NEAR	654	671	SH2	HTP	[5]	636	LTP	[14,13,17,15,16,8]
IRS1_HUMAN	NEAR	654	671	SH2	HTP	[5]	639	LTP	[14,15]
IRS1_HUMAN	INTRA	719	741	SH2	HTP	[5]	732	LTP	[13]
IRS1_HUMAN	INTRA	719	741	SH2	HTP	[5]	736	LTP	[13]
IRS1_HUMAN	INTRA	888	905	SH2	LTP	[5]	892	LTP	[14,15]
IRS1_HUMAN	INTRA	888	905	SH2	LTP	[5]	896	LTP	[14,13,15,8]
IRS1_HUMAN	INTRA	933	950	SH2	LTP	[5]	941	LTP	[13,15,8]
IRS1_HUMAN	NEAR	981	998	SH2	HTP	[5]	1005	LTP	[15]
IRS1_HUMAN	INTRA	981	998	SH2	HTP	[5]	989	HTP	[15,8]
IRS1_HUMAN	INTRA	1004	1021	SH2	HTP	[5]	1005	LTP	[15]
IRS1_HUMAN	NEAR	1004	1021	SH2	HTP	[5]	1041	LTP	[15]
IRS1_HUMAN	NEAR	1004	1021	SH2	HTP	[5]	989	HTP	[15,8]
IRS1_HUMAN	INTRA	1171	1188	SH2	LTP	[5]	1179	LTP	[13,8]
IRS1_HUMAN	INTRA	1221	1238	SH2	LTP	[5]	1222	LTP	[14,15]
IRS1_HUMAN	INTRA	1221	1238	SH2	LTP	[5]	1223	LTP	[14,13,15,8]
IRS1_HUMAN	INTRA	1221	1238	SH2	LTP	[5]	1229	LTP	[13,8]
IRS4_HUMAN	INTRA	692	709	SH2	LTP	[5]	700	LTP	[13]
IRS4_HUMAN	NEAR	692	709	SH2	LTP	[5]	717	LTP	[13]
IRS4_HUMAN	INTRA	709	726	SH2	LTP	[5]	717	LTP	[13]
IRS4_HUMAN	NEAR	709	726	SH2	LTP	[5]	700	LTP	[13]
IRS4_HUMAN	NEAR	709	726	SH2	LTP	[5]	743	LTP	[13]
IRS4_HUMAN	INTRA	735	752	SH2	LTP	[5]	743	LTP	[13]
IRS4_HUMAN	NEAR	735	752	SH2	LTP	[5]	717	LTP	[13]
IRS4_HUMAN	INTRA	771	788	SH2	LTP	[5]	779	LTP	[13]
ITA6_HUMAN	NEAR	1120	1130	PDZ	LTP	[3]	1110	HTP	[15]
ITB3_HUMAN	INTRA	765	782	SH2	LTP	[5]	773	LTP	[14,13,15,18,8]
ITB3_HUMAN	INTRA	765	782	SH2	LTP	[5]	777	LTP	[14,15]
ITB3_HUMAN	INTRA	765	782	SH2	LTP	[5]	778	LTP	[15]
ITB3_HUMAN	INTRA	765	782	SH2	LTP	[5]	779	LTP	[14,13,15,18,8]
ITB3_HUMAN	NEAR	765	782	SH2	LTP	[5]	784	LTP	[15]
ITB3_HUMAN	NEAR	765	782	SH2	LTP	[5]	785	LTP	[14,13,15,8]
ITB3_HUMAN	INTRA	777	788	SH2	LTP	[5]	777	LTP	[14,15]
ITB3_HUMAN	INTRA	777	788	SH2	LTP	[5]	778	LTP	[15]
ITB3_HUMAN	INTRA	777	788	SH2	LTP	[5]	779	LTP	[14,13,15,18,8]
ITB3_HUMAN	INTRA	777	788	SH2	LTP	[5]	784	LTP	[15]
ITB3_HUMAN	INTRA	777	788	SH2	LTP	[5]	785	LTP	[14,13,15,8]
ITB3_HUMAN	NEAR	777	788	SH2	LTP	[5]	773	LTP	[14,13,15,18,8]
ITB4_HUMAN	INTRA	1484	1501	SH2	LTP	[5]	1494	LTP	[15]
ITB4_HUMAN	INTRA	1484	1501	SH2	LTP	[5]	1487	HTP	[15]
ITB4_HUMAN	NEAR	1484	1501	SH2	LTP	[5]	1469	HTP	[13,17,15,16,8]
ITB4_HUMAN	NEAR	1484	1501	SH2	LTP	[5]	1471	HTP	[17,16]
ITB4_HUMAN	NEAR	1484	1501	SH2	LTP	[5]	1474	HTP	[13,15,16]
ITB4_HUMAN	NEAR	1484	1501	SH2	LTP	[5]	1510	HTP	[15,8]
ITB4_HUMAN	NEAR	1484	1501	SH2	LTP	[5]	1514	HTP	[15]
ITB4_HUMAN	NEAR	1484	1501	SH2	LTP	[5]	1515	HTP	[15]
ITB4_HUMAN	NEAR	1484	1501	SH2	LTP	[5]	1517	HTP	[15]
ITB4_HUMAN	NEAR	1484	1501	SH2	LTP	[5]	1518	HTP	[15]
ITB4_HUMAN	NEAR	1502	1519	SH2	LTP	[5]	1530	mHTP	[14,15,8]
ITB4_HUMAN	NEAR	1502	1519	SH2	LTP	[5]	1494	LTP	[15]
ITB4_HUMAN	INTRA	1502	1519	SH2	LTP	[5]	1510	HTP	[15,8]
ITB4_HUMAN	INTRA	1502	1519	SH2	LTP	[5]	1514	HTP	[15]
ITB4_HUMAN	INTRA	1502	1519	SH2	LTP	[5]	1515	HTP	[15]
ITB4_HUMAN	INTRA	1502	1519	SH2	LTP	[5]	1517	HTP	[15]
ITB4_HUMAN	INTRA	1502	1519	SH2	LTP	[5]	1518	HTP	[15]
ITB4_HUMAN	NEAR	1502	1519	SH2	LTP	[5]	1487	HTP	[15]
ITB4_HUMAN	NEAR	1502	1519	SH2	LTP	[5]	1524	HTP	[15]
JAK2_HUMAN	INTRA	193	210	SH2	LTP	[5]	201	LTP	[13]
JAK2_HUMAN	INTRA	193	210	SH2	LTP	[5]	206	LTP	[13]
JAK2_HUMAN	NEAR	193	210	SH2	LTP	[5]	221	LTP	[13,15]
JAK2_HUMAN	INTRA	805	822	SH2	HTP	[5]	813	LTP	[14,13,15,8]
JAK2_HUMAN	NEAR	805	822	SH2	HTP	[5]	790	HTP	[15]
JAK2_HUMAN	INTRA	926	943	SH2	LTP	[5]	931	HTP	[15]
JAK2_HUMAN	NEAR	926	943	SH2	LTP	[5]	956	HTP	[15]
JAK2_HUMAN	INTRA	958	975	SH2	LTP	[5]	966	HTP	[15]
JAK2_HUMAN	NEAR	958	975	SH2	LTP	[5]	956	HTP	[15]
JAK2_HUMAN	INTRA	999	1016	SH2	LTP	[5]	1007	LTP	[14,13,15,18,8]
JAK2_HUMAN	INTRA	999	1016	SH2	LTP	[5]	1008	LTP	[14,13,15,18,8]
JAK3_HUMAN	INTRA	777	794	SH2	HTP	[5]	785	LTP	[14,13,15,20,8]
JAK3_HUMAN	INTRA	777	794	SH2	HTP	[5]	783	HTP	[15,20]
JAM1_HUMAN	NEAR	295	299	PDZ	LTP	[1]	280	mHTP	[13,15,8]
JAM1_HUMAN	NEAR	295	299	PDZ	LTP	[1]	287	mHTP	[17,15,8]
JAM1_HUMAN	NEAR	295	299	PDZ	LTP	[1]	284	LTP	[14,17,15,8]
JAM1_HUMAN	INTRA	295	299	PDZ	LTP	[1]	296	HTP	[8]
JAM1_HUMAN	NEAR	295	299	PDZ	LTP	[1]	275	HTP	[15,8]
JAM1_HUMAN	NEAR	295	299	PDZ	LTP	[1]	281	HTP	[15,8]
JUN_HUMAN	INTRA	55	72	WW	HTP	[5]	63	LTP	[14,13,17,15,18,8]
JUN_HUMAN	NEAR	55	72	WW	HTP	[5]	73	LTP	[14,13,15,8]
JUN_HUMAN	NEAR	55	72	WW	HTP	[5]	91	LTP	[14,15,18]
JUN_HUMAN	INTRA	55	72	WW	HTP	[5]	58	HTP	[15,8]
JUN_HUMAN	INTRA	55	72	WW	HTP	[5]	62	HTP	[15,8]
JUN_HUMAN	INTRA	65	82	WW	HTP	[5]	73	LTP	[14,13,15,8]
JUN_HUMAN	NEAR	65	82	WW	HTP	[5]	63	LTP	[14,13,17,15,18,8]
JUN_HUMAN	NEAR	65	82	WW	HTP	[5]	91	LTP	[14,15,18]
JUN_HUMAN	NEAR	65	82	WW	HTP	[5]	93	LTP	[14,15,18]
JUN_HUMAN	NEAR	65	82	WW	HTP	[5]	95	LTP	[15]
JUN_HUMAN	NEAR	65	82	WW	HTP	[5]	58	HTP	[15,8]
JUN_HUMAN	NEAR	65	82	WW	HTP	[5]	62	HTP	[15,8]
JUN_HUMAN	INTRA	158	174	WW	LTP	[5]	170	LTP	[14,13,15]
JUN_HUMAN	INTRA	223	248	WW	HTP	[5]	231	LTP	[14,13,15,18]
JUN_HUMAN	INTRA	223	248	WW	HTP	[5]	239	LTP	[14,15,18,8]
JUN_HUMAN	INTRA	223	248	WW	HTP	[5]	243	LTP	[14,15,18,8]
JUN_HUMAN	NEAR	223	248	WW	HTP	[5]	249	LTP	[14,13,15,18,8]
KHDR1_HUMAN	NEAR	34	48	SH3	LTP	[1]	18	mHTP	[13,17,15,16,8]
KHDR1_HUMAN	NEAR	34	48	SH3	LTP	[1]	20	mHTP	[14,13,17,15,16,8]
KHDR1_HUMAN	NEAR	34	48	SH3	LTP	[1]	58	LTP	[14,13,17,15,16,8]
KHDR1_HUMAN	INTRA	34	48	SH3	LTP	[1]	35	HTP	[17]
KHDR1_HUMAN	NEAR	34	48	SH3	LTP	[1]	15	HTP	[15,8]
KHDR1_HUMAN	NEAR	34	48	SH3	LTP	[1]	29	HTP	[15,8]
KHDR1_HUMAN	NEAR	34	48	SH3	LTP	[1]	33	HTP	[17,8]
KHDR1_HUMAN	NEAR	34	48	SH3	LTP	[1]	61	HTP	[17,15,16]
KHDR1_HUMAN	NEAR	286	302	WW	HTP	[5]	317	LTP	[14,13]
KHDR1_HUMAN	NEAR	325	341	WW	HTP	[5]	317	LTP	[14,13]
KHDR1_HUMAN	NEAR	325	341	WW	HTP	[5]	349	HTP	[17]
KI13A_HUMAN	NEAR	1465	1478	SH3	HTP	[1]	1452	HTP	[15]
KI13A_HUMAN	NEAR	1465	1478	SH3	HTP	[1]	1460	HTP	[14,15,8]
KI2L1_HUMAN	INTRA	294	311	SH2	LTP	[5]	302	HTP	[15]
KIF11_HUMAN	INTRA	918	935	WW	HTP	[5]	926	LTP	[14,13,17,15,8]
KIF11_HUMAN	INTRA	918	935	WW	HTP	[5]	923	HTP	[13,17,15]
KIF11_HUMAN	INTRA	918	935	WW	HTP	[5]	925	HTP	[17,15]
KIF11_HUMAN	INTRA	918	935	WW	HTP	[5]	931	HTP	[14,13,17,15,8]
KIT_HUMAN	INTRA	560	579	SH2	LTP	[5]	568	LTP	[14,13,15,8]
KIT_HUMAN	INTRA	560	579	SH2	LTP	[5]	570	LTP	[14,13,15,8]
KIT_HUMAN	NEAR	560	579	SH2	LTP	[5]	545	LTP	[13]
KIT_HUMAN	NEAR	560	579	SH2	LTP	[5]	547	LTP	[13]
KIT_HUMAN	NEAR	560	579	SH2	LTP	[5]	553	LTP	[13]
KIT_HUMAN	INTRA	695	712	SH2	HTP	[5]	703	LTP	[14,13,15,8]
KIT_HUMAN	NEAR	695	712	SH2	HTP	[5]	721	LTP	[14,13,15,18]
KIT_HUMAN	NEAR	695	712	SH2	HTP	[5]	730	LTP	[13,15]
KIT_HUMAN	INTRA	713	730	SH2	LTP	[5]	721	LTP	[14,13,15,18]
KIT_HUMAN	INTRA	713	730	SH2	LTP	[5]	730	LTP	[13,15]
KIT_HUMAN	NEAR	713	730	SH2	LTP	[5]	703	LTP	[14,13,15,8]
KIT_HUMAN	NEAR	713	730	SH2	LTP	[5]	741	LTP	[14,13,15,18]
KIT_HUMAN	NEAR	713	730	SH2	LTP	[5]	746	LTP	[14,13,15,18]
KIT_HUMAN	NEAR	713	730	SH2	LTP	[5]	747	LTP	[13]
KIT_HUMAN	INTRA	892	909	SH2	HTP	[5]	900	LTP	[14,13,15]
KIT_HUMAN	NEAR	892	909	SH2	HTP	[5]	891	LTP	[15]
KIT_HUMAN	INTRA	928	945	SH2	LTP	[5]	936	LTP	[14,13,15,8]
KIT_HUMAN	NEAR	928	945	SH2	LTP	[5]	959	LTP	[14,13,15,18,20]
KPCD_HUMAN	INTRA	44	61	SH2	LTP	[5]	52	LTP	[14,13,15]
KPCD_HUMAN	NEAR	44	61	SH2	LTP	[5]	64	LTP	[14,13,15]
KPCD_HUMAN	INTRA	44	61	SH2	LTP	[5]	50	HTP	[15,8]
KPCD_HUMAN	NEAR	44	61	SH2	LTP	[5]	37	HTP	[17,15]
KPCD_HUMAN	NEAR	44	61	SH2	LTP	[5]	43	HTP	[15,20,8]
KPCG_HUMAN	INTRA	647	664	WW	HTP	[5]	648	LTP	[8]
KPCG_HUMAN	INTRA	647	664	WW	HTP	[5]	655	LTP	[14,17,15,8]
KPCG_HUMAN	NEAR	647	664	WW	HTP	[5]	674	LTP	[14,15]
KSYK_HUMAN	INTRA	315	332	SH2	LTP	[5]	323	LTP	[14,13,15,20,8]
KSYK_HUMAN	NEAR	315	332	SH2	LTP	[5]	348	LTP	[14,13,15,18,8]
KSYK_HUMAN	NEAR	315	332	SH2	LTP	[5]	352	LTP	[14,13,15,18,20,8]
KSYK_HUMAN	INTRA	315	332	SH2	LTP	[5]	319	HTP	[15,20,8]
KSYK_HUMAN	NEAR	315	332	SH2	LTP	[5]	295	HTP	[15,20]
KSYK_HUMAN	NEAR	315	332	SH2	LTP	[5]	296	HTP	[13,15,20,8]
KSYK_HUMAN	NEAR	315	332	SH2	LTP	[5]	297	HTP	[14,15,8]
KSYK_HUMAN	INTRA	340	357	SH2	LTP	[5]	348	LTP	[14,13,15,18,8]
KSYK_HUMAN	INTRA	340	357	SH2	LTP	[5]	352	LTP	[14,13,15,18,20,8]
KSYK_HUMAN	NEAR	340	357	SH2	LTP	[5]	323	LTP	[14,13,15,20,8]
KSYK_HUMAN	INTRA	344	361	SH2	LTP	[5]	348	LTP	[14,13,15,18,8]
KSYK_HUMAN	INTRA	344	361	SH2	LTP	[5]	352	LTP	[14,13,15,18,20,8]
KSYK_HUMAN	INTRA	517	534	SH2	LTP	[5]	525	LTP	[14,13,15,18,8]
KSYK_HUMAN	INTRA	517	534	SH2	LTP	[5]	526	LTP	[14,13,15,18,8]
LAIR1_HUMAN	INTRA	243	260	SH2	LTP	[5]	251	LTP	[14,15,8]
LAIR1_HUMAN	INTRA	273	287	SH2	LTP	[5]	281	LTP	[14,13,15,18,8]
LAP2B_HUMAN	INTRA	315	327	SH3	HTP	[1]	315	mHTP	[17,15,8]
LAP2B_HUMAN	NEAR	315	327	SH3	HTP	[1]	306	mHTP	[14,17,15,8]
LAP2B_HUMAN	NEAR	315	327	SH3	HTP	[1]	312	HTP	[17]
LAPM5_HUMAN	NEAR	227	243	WW	LTP	[5]	259	HTP	[15,8]
LAPM5_HUMAN	INTRA	247	262	WW	LTP	[5]	259	HTP	[15,8]
LAT_HUMAN	INTRA	153	170	SH2	LTP	[5]	156	LTP	[13,8]
LAT_HUMAN	INTRA	153	170	SH2	LTP	[5]	161	LTP	[13,15,8]
LAT_HUMAN	INTRA	192	209	SH2	LTP	[5]	200	LTP	[13,15,8]
LAT_HUMAN	NEAR	192	209	SH2	LTP	[5]	220	LTP	[14,13,15,8]
LAT_HUMAN	NEAR	192	209	SH2	LTP	[5]	224	LTP	[14,13,15,18,8]
LAT_HUMAN	INTRA	212	229	SH2	LTP	[5]	220	LTP	[14,13,15,8]
LAT_HUMAN	INTRA	212	229	SH2	LTP	[5]	224	LTP	[14,13,15,18,8]
LAT_HUMAN	NEAR	212	229	SH2	LTP	[5]	200	LTP	[13,15,8]
LAT_HUMAN	NEAR	212	229	SH2	LTP	[5]	240	HTP	[8]
LAT_HUMAN	NEAR	212	229	SH2	LTP	[5]	241	HTP	[8]
LAT_HUMAN	INTRA	247	262	SH2	LTP	[5]	255	LTP	[13,15,8]
LAT_HUMAN	NEAR	247	262	SH2	LTP	[5]	240	HTP	[8]
LAT_HUMAN	NEAR	247	262	SH2	LTP	[5]	241	HTP	[8]
LCK_HUMAN	INTRA	386	403	SH2	HTP	[5]	394	LTP	[14,13,15,8]
LCK_HUMAN	INTRA	497	509	SH2	LTP	[5]	505	LTP	[14,13,17,15,20,8]
LCK_HUMAN	INTRA	497	509	SH2	LTP	[5]	501	HTP	[14,8]
LCK_HUMAN	INTRA	505	508	SH2	LTP	[2]	505	LTP	[14,13,17,15,20,8]
LCK_HUMAN	NEAR	505	508	SH2	LTP	[2]	501	HTP	[14,8]
LCP2_HUMAN	INTRA	105	122	SH2	LTP	[5]	113	LTP	[14,13,15,18]
LCP2_HUMAN	NEAR	105	122	SH2	LTP	[5]	128	LTP	[14,13,15,18]
LCP2_HUMAN	NEAR	105	122	SH2	LTP	[5]	130	LTP	[14,15]
LCP2_HUMAN	INTRA	120	137	SH2	LTP	[5]	128	LTP	[14,13,15,18]
LCP2_HUMAN	INTRA	120	137	SH2	LTP	[5]	130	LTP	[14,15]
LCP2_HUMAN	NEAR	120	137	SH2	LTP	[5]	113	LTP	[14,13,15,18]
LCP2_HUMAN	NEAR	120	137	SH2	LTP	[5]	145	LTP	[14,13,15]
LCP2_HUMAN	INTRA	137	154	SH2	HTP	[5]	145	LTP	[14,13,15]
LCP2_HUMAN	NEAR	137	154	SH2	HTP	[5]	128	LTP	[14,13,15,18]
LCP2_HUMAN	NEAR	137	154	SH2	HTP	[5]	130	LTP	[14,15]
LCP2_HUMAN	NEAR	137	154	SH2	HTP	[5]	173	HTP	[14,13,15,8]
LEPR_HUMAN	INTRA	978	995	SH2	HTP	[5]	986	LTP	[13,15,8]
LEPR_HUMAN	INTRA	1071	1088	SH2	HTP	[5]	1079	LTP	[15]
LIPA3_HUMAN	INTRA	1161	1174	SH3	HTP	[1]	1164	HTP	[8]
LMNA_HUMAN	INTRA	11	28	WW	HTP	[5]	18	mHTP	[17,15,19,8]
LMNA_HUMAN	INTRA	11	28	WW	HTP	[5]	19	LTP	[14,13,17,15,16,19,18,8]
LMNA_HUMAN	INTRA	11	28	WW	HTP	[5]	22	LTP	[14,13,17,15,16,19,18,8]
LMNA_HUMAN	INTRA	11	28	WW	HTP	[5]	24	LTP	[13,17,16,19,8]
LMNA_HUMAN	NEAR	11	28	WW	HTP	[5]	5	LTP	[14,18]
LMNA_HUMAN	INTRA	11	28	WW	HTP	[5]	12	HTP	[17,15,8]
LMNA_HUMAN	INTRA	11	28	WW	HTP	[5]	17	HTP	[17,15]
LMNA_HUMAN	NEAR	11	28	WW	HTP	[5]	10	HTP	[14,13,17,16,8]
LMNA_HUMAN	NEAR	11	28	WW	HTP	[5]	3	HTP	[17]
LRBA_HUMAN	INTRA	33	46	SH3	HTP	[1]	34	HTP	[13,16]
LRBA_HUMAN	NEAR	33	46	SH3	HTP	[1]	14	HTP	[13,16]
LRBA_HUMAN	NEAR	33	46	SH3	HTP	[1]	26	HTP	[16]
LRBA_HUMAN	NEAR	33	46	SH3	HTP	[1]	28	HTP	[17,16]
LY66F_HUMAN	INTRA	273	290	SH2	LTP	[5]	281	LTP	[13,15,8]
LY9_HUMAN	NEAR	618	635	SH2	LTP	[5]	651	LTP	[15]
LYAM2_HUMAN	INTRA	595	610	SH2	LTP	[5]	603	LTP	[13]
M4K1_HUMAN	NEAR	308	321	SH3	HTP	[1]	324	HTP	[15,20]
M4K1_HUMAN	NEAR	391	404	SH3	HTP	[1]	407	mHTP	[14,13,8]
M4K1_HUMAN	NEAR	391	404	SH3	HTP	[1]	413	mHTP	[14,8]
M4K1_HUMAN	NEAR	391	404	SH3	HTP	[1]	421	mHTP	[14,13,15,20,8]
M4K1_HUMAN	NEAR	391	404	SH3	HTP	[1]	381	LTP	[14,13,18,8]
M4K1_HUMAN	NEAR	391	404	SH3	HTP	[1]	374	HTP	[14,15,20,8]
M4K1_HUMAN	NEAR	391	404	SH3	HTP	[1]	376	HTP	[14,13,15,20,8]
M4K1_HUMAN	NEAR	391	404	SH3	HTP	[1]	377	HTP	[13,15,20]
M4K1_HUMAN	NEAR	391	404	SH3	HTP	[1]	405	HTP	[8]
MAG_HUMAN	INTRA	612	626	SH2	LTP	[5]	620	LTP	[13]
MAP2_HUMAN	INTRA	52	71	SH2	HTP	[5]	67	LTP	[14,15]
MAP2_HUMAN	INTRA	52	71	SH2	HTP	[5]	63	HTP	[13,15,8]
MAP2_HUMAN	INTRA	62	71	SH2	LTP	[1]	67	LTP	[14,15]
MAP2_HUMAN	INTRA	62	71	SH2	LTP	[1]	63	HTP	[13,15,8]
MAP4_HUMAN	INTRA	688	700	SH3	HTP	[1]	696	LTP	[14,13,17,15,18,8]
MAP4_HUMAN	NEAR	688	700	SH3	HTP	[1]	687	HTP	[17,15]
MAP4_HUMAN	NEAR	688	700	SH3	HTP	[1]	712	HTP	[17]
MAP4_HUMAN	NEAR	688	700	SH3	HTP	[1]	714	HTP	[17]
MAPK2_HUMAN	INTRA	326	343	WW	HTP	[5]	334	LTP	[14,13,15,18,8]
MAPK2_HUMAN	INTRA	326	343	WW	HTP	[5]	338	LTP	[14,13,15,8]
MAPK2_HUMAN	NEAR	326	343	WW	HTP	[5]	317	LTP	[13]
MBP_HUMAN	INTRA	221	238	WW	HTP	[5]	229	LTP	[13,8]
MBP_HUMAN	INTRA	221	238	WW	HTP	[5]	232	LTP	[14,13,15,8]
MBP_HUMAN	NEAR	221	238	WW	HTP	[5]	205	LTP	[13,8]
MBP_HUMAN	NEAR	221	238	WW	HTP	[5]	249	LTP	[13,8]
MET_HUMAN	INTRA	1305	1322	SH2	LTP	[5]	1313	LTP	[14,15,18]
MET_HUMAN	NEAR	1305	1322	SH2	LTP	[5]	1295	LTP	[13]
MET_HUMAN	NEAR	1305	1322	SH2	LTP	[5]	1331	LTP	[13]
MET_HUMAN	NEAR	1305	1322	SH2	LTP	[5]	1338	LTP	[13]
MET_HUMAN	NEAR	1305	1322	SH2	LTP	[5]	1289	HTP	[15]
MET_HUMAN	INTRA	1348	1365	SH2	LTP	[5]	1349	LTP	[14,13,15]
MET_HUMAN	INTRA	1348	1365	SH2	LTP	[5]	1356	LTP	[14,13,15,8]
MET_HUMAN	INTRA	1348	1365	SH2	LTP	[5]	1365	LTP	[14,13,15]
MET_HUMAN	NEAR	1348	1365	SH2	LTP	[5]	1331	LTP	[13]
MET_HUMAN	NEAR	1348	1365	SH2	LTP	[5]	1338	LTP	[13]
MET_HUMAN	INTRA	1348	1365	SH2	LTP	[5]	1355	HTP	[15]
MET_HUMAN	INTRA	1349	1352	SH2	LTP	[5]	1349	LTP	[14,13,15]
MET_HUMAN	NEAR	1349	1352	SH2	LTP	[5]	1331	LTP	[13]
MET_HUMAN	NEAR	1349	1352	SH2	LTP	[5]	1338	LTP	[13]
MET_HUMAN	NEAR	1349	1352	SH2	LTP	[5]	1356	LTP	[14,13,15,8]
MET_HUMAN	NEAR	1349	1352	SH2	LTP	[5]	1365	LTP	[14,13,15]
MET_HUMAN	NEAR	1349	1352	SH2	LTP	[5]	1355	HTP	[15]
MET_HUMAN	INTRA	1356	1359	SH2	LTP	[2]	1356	LTP	[14,13,15,8]
MET_HUMAN	NEAR	1356	1359	SH2	LTP	[2]	1338	LTP	[13]
MET_HUMAN	NEAR	1356	1359	SH2	LTP	[2]	1349	LTP	[14,13,15]
MET_HUMAN	NEAR	1356	1359	SH2	LTP	[2]	1365	LTP	[14,13,15]
MET_HUMAN	NEAR	1356	1359	SH2	LTP	[2]	1355	HTP	[15]
MLL4_HUMAN	NEAR	1096	1109	SH3	HTP	[1]	1092	HTP	[17]
MLL4_HUMAN	NEAR	1096	1109	SH3	HTP	[1]	1095	HTP	[17]
MPIP3_HUMAN	NEAR	40	57	WW	HTP	[5]	64	mHTP	[15,8]
MPIP3_HUMAN	INTRA	40	57	WW	HTP	[5]	48	LTP	[14,13,15,8]
MPIP3_HUMAN	NEAR	40	57	WW	HTP	[5]	67	LTP	[14,13,15,8]
MPIP3_HUMAN	INTRA	40	57	WW	HTP	[5]	57	HTP	[15,8]
MPIP3_HUMAN	NEAR	40	57	WW	HTP	[5]	37	HTP	[17,15]
MPIP3_HUMAN	NEAR	40	57	WW	HTP	[5]	38	HTP	[15,8]
MPIP3_HUMAN	NEAR	40	57	WW	HTP	[5]	61	HTP	[17,15,8]
MPZL1_HUMAN	NEAR	233	250	SH2	LTP	[5]	219	mHTP	[14,17,15,16,8]
MPZL1_HUMAN	NEAR	233	250	SH2	LTP	[5]	260	mHTP	[15,8]
MPZL1_HUMAN	INTRA	233	250	SH2	LTP	[5]	241	LTP	[14,13,17,15,8]
MPZL1_HUMAN	NEAR	233	250	SH2	LTP	[5]	263	LTP	[14,13,17,15,18,8]
MPZL1_HUMAN	NEAR	233	250	SH2	LTP	[5]	221	HTP	[17,15,16,8]
MPZL1_HUMAN	NEAR	233	250	SH2	LTP	[5]	223	HTP	[13,16]
MPZL1_HUMAN	NEAR	233	250	SH2	LTP	[5]	258	HTP	[15]
MPZL1_HUMAN	INTRA	255	269	SH2	LTP	[5]	260	mHTP	[15,8]
MPZL1_HUMAN	INTRA	255	269	SH2	LTP	[5]	263	LTP	[14,13,17,15,18,8]
MPZL1_HUMAN	NEAR	255	269	SH2	LTP	[5]	241	LTP	[14,13,17,15,8]
MPZL1_HUMAN	INTRA	255	269	SH2	LTP	[5]	258	HTP	[15]
MYBB_HUMAN	INTRA	432	449	WW	HTP	[5]	440	LTP	[13,8]
MYBB_HUMAN	INTRA	432	449	WW	HTP	[5]	444	LTP	[14,13,18,8]
MYBB_HUMAN	NEAR	432	449	WW	HTP	[5]	452	LTP	[13,15]
MYBB_HUMAN	INTRA	479	496	WW	HTP	[5]	487	LTP	[14,13,18,8]
MYBB_HUMAN	INTRA	479	496	WW	HTP	[5]	494	LTP	[14,13,18,8]
MYBB_HUMAN	NEAR	479	496	WW	HTP	[5]	515	LTP	[13]
MYC_HUMAN	INTRA	57	65	SH3	LTP	[2]	58	LTP	[14,15,18,8]
MYC_HUMAN	INTRA	57	65	SH3	LTP	[2]	62	LTP	[14,15,18,8]
MYC_HUMAN	INTRA	57	65	SH3	LTP	[2]	64	LTP	[15]
MYC_HUMAN	NEAR	57	65	SH3	LTP	[2]	67	LTP	[15]
MYC_HUMAN	NEAR	57	65	SH3	LTP	[2]	71	LTP	[15,8]
MYCN_HUMAN	INTRA	50	67	WW	HTP	[5]	62	mHTP	[14,13,17,15,18,8]
MYCN_HUMAN	INTRA	50	67	WW	HTP	[5]	58	HTP	[14,13,15,18,8]
MYLK_HUMAN	NEAR	1222	1234	SH3	HTP	[1]	1208	LTP	[14,13]
MYPC2_HUMAN	NEAR	75	87	SH3	HTP	[1]	105	HTP	[13,8]
MYPN_HUMAN	NEAR	646	657	SH3	LTP	[1]	643	HTP	[15]
MYPN_HUMAN	NEAR	646	657	SH3	LTP	[1]	644	HTP	[13,15]
MYPT1_HUMAN	INTRA	495	508	SH3	HTP	[1]	507	mHTP	[14,15,16,8]
MYPT1_HUMAN	INTRA	495	508	SH3	HTP	[1]	496	HTP	[15]
MYPT1_HUMAN	INTRA	495	508	SH3	HTP	[1]	508	HTP	[15,8]
MYPT1_HUMAN	NEAR	495	508	SH3	HTP	[1]	477	HTP	[15,8]
MYPT1_HUMAN	NEAR	495	508	SH3	HTP	[1]	478	HTP	[15]
MYPT1_HUMAN	NEAR	495	508	SH3	HTP	[1]	509	HTP	[15,8]
NCF1_HUMAN	NEAR	363	368	SH3	LTP	[2]	345	LTP	[14,15,18,8]
NCF1_HUMAN	NEAR	363	368	SH3	LTP	[2]	348	LTP	[14,15,18,8]
NCF1_HUMAN	NEAR	363	368	SH3	LTP	[2]	359	LTP	[14,15]
NCF1_HUMAN	NEAR	363	368	SH3	LTP	[2]	370	LTP	[14,15]
NCF1_HUMAN	NEAR	363	368	SH3	LTP	[2]	379	LTP	[14,15]
NCF1_HUMAN	NEAR	363	368	SH3	LTP	[2]	356	HTP	[15]
NFAC2_HUMAN	NEAR	45	62	WW	LTP	[5]	77	HTP	[17]
NFAC2_HUMAN	NEAR	65	82	WW	LTP	[5]	99	LTP	[13,8]
NFAC2_HUMAN	INTRA	65	82	WW	LTP	[5]	77	HTP	[17]
NFAC2_HUMAN	NEAR	102	119	WW	LTP	[5]	99	LTP	[13,8]
NFAC2_HUMAN	INTRA	160	177	WW	LTP	[5]	168	LTP	[13,8]
NFAC2_HUMAN	INTRA	160	177	WW	LTP	[5]	171	LTP	[13,8]
NFAC2_HUMAN	INTRA	160	177	WW	LTP	[5]	172	LTP	[13,8]
NFAC2_HUMAN	INTRA	160	177	WW	LTP	[5]	174	LTP	[13,8]
NFAC2_HUMAN	INTRA	160	177	WW	LTP	[5]	175	LTP	[13,8]
NFAC2_HUMAN	INTRA	160	177	WW	LTP	[5]	177	LTP	[13,8]
NFAC2_HUMAN	NEAR	160	177	WW	LTP	[5]	180	LTP	[13,8]
NFAC2_HUMAN	INTRA	176	193	WW	LTP	[5]	177	LTP	[13,8]
NFAC2_HUMAN	INTRA	176	193	WW	LTP	[5]	180	LTP	[13,8]
NFAC2_HUMAN	NEAR	176	193	WW	LTP	[5]	168	LTP	[13,8]
NFAC2_HUMAN	NEAR	176	193	WW	LTP	[5]	171	LTP	[13,8]
NFAC2_HUMAN	NEAR	176	193	WW	LTP	[5]	172	LTP	[13,8]
NFAC2_HUMAN	NEAR	176	193	WW	LTP	[5]	174	LTP	[13,8]
NFAC2_HUMAN	NEAR	176	193	WW	LTP	[5]	175	LTP	[13,8]
NFAC2_HUMAN	NEAR	176	193	WW	LTP	[5]	213	LTP	[13,8]
NFAC2_HUMAN	NEAR	184	201	WW	LTP	[5]	168	LTP	[13,8]
NFAC2_HUMAN	NEAR	184	201	WW	LTP	[5]	171	LTP	[13,8]
NFAC2_HUMAN	NEAR	184	201	WW	LTP	[5]	172	LTP	[13,8]
NFAC2_HUMAN	NEAR	184	201	WW	LTP	[5]	174	LTP	[13,8]
NFAC2_HUMAN	NEAR	184	201	WW	LTP	[5]	175	LTP	[13,8]
NFAC2_HUMAN	NEAR	184	201	WW	LTP	[5]	177	LTP	[13,8]
NFAC2_HUMAN	NEAR	184	201	WW	LTP	[5]	180	LTP	[13,8]
NFAC2_HUMAN	NEAR	184	201	WW	LTP	[5]	213	LTP	[13,8]
NFAC2_HUMAN	NEAR	184	201	WW	LTP	[5]	217	LTP	[13,8]
NFAC2_HUMAN	NEAR	184	201	WW	LTP	[5]	221	LTP	[13,8]
NFAC2_HUMAN	INTRA	205	222	WW	LTP	[5]	213	LTP	[13,8]
NFAC2_HUMAN	INTRA	205	222	WW	LTP	[5]	217	LTP	[13,8]
NFAC2_HUMAN	INTRA	205	222	WW	LTP	[5]	221	LTP	[13,8]
NFAC2_HUMAN	NEAR	205	222	WW	LTP	[5]	236	LTP	[13,8]
NFAC2_HUMAN	INTRA	209	226	WW	LTP	[5]	213	LTP	[13,8]
NFAC2_HUMAN	INTRA	209	226	WW	LTP	[5]	217	LTP	[13,8]
NFAC2_HUMAN	INTRA	209	226	WW	LTP	[5]	221	LTP	[13,8]
NFAC2_HUMAN	NEAR	209	226	WW	LTP	[5]	236	LTP	[13,8]
NFAC2_HUMAN	NEAR	209	226	WW	LTP	[5]	243	LTP	[13,8]
NFAC2_HUMAN	INTRA	213	230	WW	LTP	[5]	213	LTP	[13,8]
NFAC2_HUMAN	INTRA	213	230	WW	LTP	[5]	217	LTP	[13,8]
NFAC2_HUMAN	INTRA	213	230	WW	LTP	[5]	221	LTP	[13,8]
NFAC2_HUMAN	NEAR	213	230	WW	LTP	[5]	236	LTP	[13,8]
NFAC2_HUMAN	NEAR	213	230	WW	LTP	[5]	243	LTP	[13,8]
NFAC2_HUMAN	INTRA	226	285	WW	LTP	[5]	236	LTP	[13,8]
NFAC2_HUMAN	INTRA	226	285	WW	LTP	[5]	243	LTP	[13,8]
NFAC2_HUMAN	INTRA	226	285	WW	LTP	[5]	268	LTP	[13,8]
NFAC2_HUMAN	INTRA	226	285	WW	LTP	[5]	274	LTP	[13,8]
NFAC2_HUMAN	INTRA	226	285	WW	LTP	[5]	276	LTP	[13,8]
NFAC2_HUMAN	INTRA	226	285	WW	LTP	[5]	280	LTP	[13,8]
NFAC2_HUMAN	NEAR	226	285	WW	LTP	[5]	213	LTP	[13,8]
NFAC2_HUMAN	NEAR	226	285	WW	LTP	[5]	217	LTP	[13,8]
NFAC2_HUMAN	NEAR	226	285	WW	LTP	[5]	221	LTP	[13,8]
NFAC2_HUMAN	INTRA	228	245	WW	LTP	[5]	236	LTP	[13,8]
NFAC2_HUMAN	INTRA	228	245	WW	LTP	[5]	243	LTP	[13,8]
NFAC2_HUMAN	NEAR	228	245	WW	LTP	[5]	213	LTP	[13,8]
NFAC2_HUMAN	NEAR	228	245	WW	LTP	[5]	217	LTP	[13,8]
NFAC2_HUMAN	NEAR	228	245	WW	LTP	[5]	221	LTP	[13,8]
NFAC2_HUMAN	INTRA	239	256	WW	LTP	[5]	243	LTP	[13,8]
NFAC2_HUMAN	NEAR	239	256	WW	LTP	[5]	221	LTP	[13,8]
NFAC2_HUMAN	NEAR	239	256	WW	LTP	[5]	236	LTP	[13,8]
NFAC2_HUMAN	NEAR	239	256	WW	LTP	[5]	268	LTP	[13,8]
NFAC2_HUMAN	NEAR	239	256	WW	LTP	[5]	274	LTP	[13,8]
NFAC2_HUMAN	NEAR	239	256	WW	LTP	[5]	276	LTP	[13,8]
NFAC2_HUMAN	INTRA	260	277	WW	LTP	[5]	268	LTP	[13,8]
NFAC2_HUMAN	INTRA	260	277	WW	LTP	[5]	274	LTP	[13,8]
NFAC2_HUMAN	INTRA	260	277	WW	LTP	[5]	276	LTP	[13,8]
NFAC2_HUMAN	NEAR	260	277	WW	LTP	[5]	243	LTP	[13,8]
NFAC2_HUMAN	NEAR	260	277	WW	LTP	[5]	280	LTP	[13,8]
NFAM1_HUMAN	INTRA	212	229	SH2	HTP	[5]	220	LTP	[8]
NFAM1_HUMAN	NEAR	212	229	SH2	HTP	[5]	231	LTP	[8]
NFAM1_HUMAN	INTRA	223	240	SH2	HTP	[5]	231	LTP	[8]
NFAM1_HUMAN	NEAR	223	240	SH2	HTP	[5]	220	LTP	[8]
NKG2A_HUMAN	INTRA	32	49	SH2	LTP	[5]	40	LTP	[15]
NMDE1_HUMAN	INTRA	1223	1233	PDZ	LTP	[1]	1232	LTP	[14,13,18]
NMDE2_HUMAN	INTRA	1474	1484	PDZ	LTP	[1]	1474	LTP	[13,8]
NTRK1_HUMAN	INTRA	488	505	SH2	LTP	[5]	496	LTP	[14,15,18,8]
NTRK1_HUMAN	INTRA	675	692	SH2	LTP	[5]	676	LTP	[14,15,18,8]
NTRK1_HUMAN	INTRA	675	692	SH2	LTP	[5]	680	LTP	[14,15,18,8]
NTRK1_HUMAN	INTRA	675	692	SH2	LTP	[5]	681	LTP	[14,15,18,8]
NTRK1_HUMAN	NEAR	675	692	SH2	LTP	[5]	701	LTP	[15]
NTRK1_HUMAN	INTRA	749	766	SH2	HTP	[5]	757	LTP	[14,15]
NTRK1_HUMAN	INTRA	783	796	SH2	LTP	[5]	791	LTP	[14,15,18,8]
NTRK2_HUMAN	INTRA	697	714	SH2	LTP	[5]	706	LTP	[15,8]
OPRK_HUMAN	NEAR	370	380	PDZ	LTP	[3]	358	LTP	[15]
ORC1_HUMAN	NEAR	425	438	SH3	HTP	[1]	417	mHTP	[14,13,17,15,16,8]
ORC1_HUMAN	NEAR	425	438	SH3	HTP	[1]	419	mHTP	[14,13,17,16,8]
ORC1_HUMAN	NEAR	425	438	SH3	HTP	[1]	420	mHTP	[14,13,17,15,16,8]
ORC1_HUMAN	NEAR	425	438	SH3	HTP	[1]	421	mHTP	[14,13,17,15,16,8]
ORC1_HUMAN	INTRA	425	438	SH3	HTP	[1]	427	HTP	[15,8]
P2RY1_HUMAN	NEAR	363	373	PDZ	LTP	[3]	352	LTP	[14,15,8]
P2RY1_HUMAN	NEAR	363	373	PDZ	LTP	[3]	358	LTP	[15]
P2RY1_HUMAN	NEAR	363	373	PDZ	LTP	[3]	354	HTP	[14,15,8]
P2RY2_HUMAN	NEAR	322	331	SH3	LTP	[6]	344	LTP	[15]
P53_HUMAN	INTRA	25	42	WW	LTP	[5]	33	LTP	[14,13,15,18]
P53_HUMAN	INTRA	25	42	WW	LTP	[5]	37	LTP	[14,13,15,18]
P53_HUMAN	NEAR	25	42	WW	LTP	[5]	15	LTP	[14,13,15,18,8]
P53_HUMAN	NEAR	25	42	WW	LTP	[5]	18	LTP	[14,13,15,18,8]
P53_HUMAN	NEAR	25	42	WW	LTP	[5]	20	LTP	[14,13,15,18]
P53_HUMAN	NEAR	25	42	WW	LTP	[5]	46	LTP	[14,13,15,18,8]
P53_HUMAN	NEAR	25	42	WW	LTP	[5]	55	LTP	[14,13,15,18,8]
P53_HUMAN	NEAR	25	42	WW	LTP	[5]	6	LTP	[13,15]
P53_HUMAN	NEAR	25	42	WW	LTP	[5]	9	LTP	[14,13,15,18,8]
P53_HUMAN	INTRA	38	55	WW	LTP	[5]	46	LTP	[14,13,15,18,8]
P53_HUMAN	INTRA	38	55	WW	LTP	[5]	55	LTP	[14,13,15,18,8]
P53_HUMAN	NEAR	38	55	WW	LTP	[5]	18	LTP	[14,13,15,18,8]
P53_HUMAN	NEAR	38	55	WW	LTP	[5]	20	LTP	[14,13,15,18]
P53_HUMAN	NEAR	38	55	WW	LTP	[5]	33	LTP	[14,13,15,18]
P53_HUMAN	NEAR	38	55	WW	LTP	[5]	37	LTP	[14,13,15,18]
P53_HUMAN	INTRA	73	90	WW	LTP	[5]	81	LTP	[13,15]
P53_HUMAN	NEAR	73	90	WW	LTP	[5]	55	LTP	[14,13,15,18,8]
P53_HUMAN	NEAR	73	90	WW	LTP	[5]	99	HTP	[13,15,8]
P53_HUMAN	INTRA	307	326	WW	LTP	[5]	312	LTP	[15]
P53_HUMAN	INTRA	307	326	WW	LTP	[5]	313	LTP	[15,20]
P53_HUMAN	INTRA	307	326	WW	LTP	[5]	314	LTP	[15,20,8]
P53_HUMAN	INTRA	307	326	WW	LTP	[5]	315	LTP	[14,13,15,16,8]
P73_HUMAN	INTRA	91	108	SH2	LTP	[5]	99	LTP	[14,13,15,8]
P73_HUMAN	NEAR	91	108	SH2	LTP	[5]	86	LTP	[14,13,15]
P73_HUMAN	NEAR	113	130	SH2	LTP	[5]	99	LTP	[14,13,15,8]
P73_HUMAN	NEAR	395	411	WW	LTP	[5]	388	LTP	[15]
P73_HUMAN	NEAR	407	413	SH3	LTP	[4]	388	LTP	[15]
P85A_HUMAN	INTRA	680	697	SH2	LTP	[5]	688	LTP	[14,13]
P85A_HUMAN	NEAR	680	697	SH2	LTP	[5]	679	HTP	[8]
PAG1_HUMAN	INTRA	309	326	SH2	LTP	[5]	317	LTP	[14,13,15,8]
PAG1_HUMAN	NEAR	309	326	SH2	LTP	[5]	299	LTP	[15]
PAG1_HUMAN	NEAR	309	326	SH2	LTP	[5]	341	LTP	[14,13,15,18,20,8]
PAG1_HUMAN	NEAR	309	326	SH2	LTP	[5]	290	HTP	[16]
PAG1_HUMAN	NEAR	422	432	PDZ	LTP	[3]	417	mHTP	[14,13,15,18,8]
PAK1_HUMAN	INTRA	10	22	SH3	HTP	[1]	21	LTP	[13,15,8]
PAK1_HUMAN	INTRA	183	204	SH3	LTP	[1]	199	LTP	[13,15,8]
PAK1_HUMAN	INTRA	183	204	SH3	LTP	[1]	204	LTP	[13,15,8]
PAK1_HUMAN	NEAR	183	204	SH3	LTP	[1]	174	LTP	[15]
PAK1_HUMAN	NEAR	183	204	SH3	LTP	[1]	212	LTP	[14,13,15,18,8]
PAK1_HUMAN	NEAR	183	204	SH3	LTP	[1]	219	HTP	[8]
PAK1_HUMAN	NEAR	183	204	SH3	LTP	[1]	220	HTP	[15,8]
PAK1_HUMAN	NEAR	183	204	SH3	LTP	[1]	223	HTP	[15,8]
PAX3_HUMAN	NEAR	207	220	SH3	HTP	[1]	205	LTP	[15]
PAXI_HUMAN	INTRA	23	40	SH2	LTP	[5]	31	LTP	[14,13,18,8]
PAXI_HUMAN	INTRA	23	40	SH2	LTP	[5]	40	LTP	[14,13]
PAXI_HUMAN	INTRA	40	43	SH2	LTP	[4]	40	LTP	[14,13]
PAXI_HUMAN	NEAR	40	43	SH2	LTP	[4]	31	LTP	[14,13,18,8]
PAXI_HUMAN	NEAR	110	127	SH2	LTP	[5]	106	mHTP	[14,17,15,19,8]
PAXI_HUMAN	NEAR	110	127	SH2	LTP	[5]	135	mHTP	[17,19]
PAXI_HUMAN	INTRA	110	127	SH2	LTP	[5]	118	LTP	[14,13,17,15,16,18,8]
PAXI_HUMAN	INTRA	110	127	SH2	LTP	[5]	126	LTP	[14,17,8]
PAXI_HUMAN	NEAR	110	127	SH2	LTP	[5]	130	LTP	[14,17,8]
PAXI_HUMAN	INTRA	110	127	SH2	LTP	[5]	119	HTP	[17]
PAXI_HUMAN	NEAR	110	127	SH2	LTP	[5]	103	HTP	[19]
PAXI_HUMAN	NEAR	110	127	SH2	LTP	[5]	109	HTP	[17,8]
PAXI_HUMAN	NEAR	110	127	SH2	LTP	[5]	132	HTP	[17]
PAXI_HUMAN	NEAR	110	127	SH2	LTP	[5]	137	HTP	[19,8]
PAXI_HUMAN	NEAR	173	190	SH2	LTP	[5]	170	mHTP	[17,19]
PAXI_HUMAN	INTRA	173	190	SH2	LTP	[5]	178	LTP	[13,17,15]
PAXI_HUMAN	INTRA	173	190	SH2	LTP	[5]	181	LTP	[14,13,17,18,8]
PAXI_HUMAN	INTRA	173	190	SH2	LTP	[5]	188	LTP	[13,17]
PAXI_HUMAN	INTRA	173	190	SH2	LTP	[5]	186	HTP	[17]
PAXI_HUMAN	NEAR	173	190	SH2	LTP	[5]	169	HTP	[19]
PDLI7_HUMAN	NEAR	114	129	WW	LTP	[5]	111	HTP	[17]
PEBP1_HUMAN	NEAR	66	79	SH3	HTP	[1]	51	mHTP	[17]
PEBP1_HUMAN	NEAR	66	79	SH3	HTP	[1]	52	mHTP	[14,13,17,16,8]
PEBP1_HUMAN	NEAR	66	79	SH3	HTP	[1]	54	HTP	[17,16,8]
PECA1_HUMAN	INTRA	682	699	SH2	LTP	[5]	690	LTP	[14,13,15]
PECA1_HUMAN	NEAR	682	699	SH2	LTP	[5]	700	LTP	[14]
PECA1_HUMAN	NEAR	682	699	SH2	LTP	[5]	713	LTP	[14,13,15,18,8]
PECA1_HUMAN	NEAR	682	699	SH2	LTP	[5]	663	HTP	[15]
PECA1_HUMAN	INTRA	705	722	SH2	LTP	[5]	713	LTP	[14,13,15,18,8]
PECA1_HUMAN	NEAR	705	722	SH2	LTP	[5]	690	LTP	[14,13,15]
PECA1_HUMAN	NEAR	705	722	SH2	LTP	[5]	700	LTP	[14]
PGFRA_HUMAN	INTRA	712	729	SH2	HTP	[5]	720	LTP	[14,13,15,8]
PGFRA_HUMAN	NEAR	712	729	SH2	HTP	[5]	731	LTP	[14,13,15]
PGFRA_HUMAN	NEAR	712	729	SH2	HTP	[5]	742	LTP	[14,13,15]
PGFRA_HUMAN	INTRA	754	771	SH2	LTP	[5]	754	LTP	[14,13,15]
PGFRA_HUMAN	INTRA	754	771	SH2	LTP	[5]	762	LTP	[14,13,15,8]
PGFRA_HUMAN	INTRA	754	771	SH2	LTP	[5]	767	LTP	[14,13,15]
PGFRA_HUMAN	INTRA	754	771	SH2	LTP	[5]	768	LTP	[14,13,15,8]
PGFRA_HUMAN	NEAR	754	771	SH2	LTP	[5]	742	LTP	[14,13,15]
PGFRA_HUMAN	INTRA	980	997	SH2	LTP	[5]	988	LTP	[14,13,15]
PGFRA_HUMAN	INTRA	980	997	SH2	LTP	[5]	993	LTP	[13]
PGFRA_HUMAN	NEAR	980	997	SH2	LTP	[5]	962	HTP	[15]
PGFRA_HUMAN	INTRA	1010	1027	SH2	LTP	[5]	1018	LTP	[14,13,15,8]
PGFRA_HUMAN	NEAR	1010	1027	SH2	LTP	[5]	993	LTP	[13]
PGFRB_HUMAN	INTRA	571	588	SH2	LTP	[5]	579	LTP	[14,13,15]
PGFRB_HUMAN	INTRA	571	588	SH2	LTP	[5]	581	LTP	[14,13,15]
PGFRB_HUMAN	NEAR	571	588	SH2	LTP	[5]	562	LTP	[14,15]
PGFRB_HUMAN	INTRA	581	584	SH2	LTP	[5]	581	LTP	[14,13,15]
PGFRB_HUMAN	NEAR	581	584	SH2	LTP	[5]	562	LTP	[14,15]
PGFRB_HUMAN	NEAR	581	584	SH2	LTP	[5]	579	LTP	[14,13,15]
PGFRB_HUMAN	INTRA	677	694	SH2	HTP	[5]	686	LTP	[15]
PGFRB_HUMAN	INTRA	708	725	SH2	LTP	[5]	716	LTP	[14,13,15]
PGFRB_HUMAN	NEAR	708	725	SH2	LTP	[5]	740	LTP	[14,13,15,18]
PGFRB_HUMAN	INTRA	716	719	SH2	LTP	[4]	716	LTP	[14,13,15]
PGFRB_HUMAN	INTRA	732	749	SH2	LTP	[5]	740	LTP	[14,13,15,18]
PGFRB_HUMAN	NEAR	732	749	SH2	LTP	[5]	716	LTP	[14,13,15]
PGFRB_HUMAN	NEAR	732	749	SH2	LTP	[5]	751	LTP	[14,13,15,18,8]
PGFRB_HUMAN	NEAR	732	749	SH2	LTP	[5]	763	LTP	[14,13,15,18]
PGFRB_HUMAN	INTRA	751	754	SH2	LTP	[5]	751	LTP	[14,13,15,18,8]
PGFRB_HUMAN	NEAR	751	754	SH2	LTP	[5]	740	LTP	[14,13,15,18]
PGFRB_HUMAN	NEAR	751	754	SH2	LTP	[5]	763	LTP	[14,13,15,18]
PGFRB_HUMAN	NEAR	751	754	SH2	LTP	[5]	771	LTP	[14,13,15,18]
PGFRB_HUMAN	INTRA	763	780	SH2	LTP	[5]	763	LTP	[14,13,15,18]
PGFRB_HUMAN	INTRA	763	780	SH2	LTP	[5]	771	LTP	[14,13,15,18]
PGFRB_HUMAN	INTRA	763	780	SH2	LTP	[5]	775	LTP	[14,13,15]
PGFRB_HUMAN	INTRA	763	780	SH2	LTP	[5]	778	LTP	[14,15]
PGFRB_HUMAN	NEAR	763	780	SH2	LTP	[5]	751	LTP	[14,13,15,18,8]
PGFRB_HUMAN	INTRA	849	866	SH2	LTP	[5]	857	LTP	[14,13,15,18,8]
PGFRB_HUMAN	NEAR	871	888	SH2	HTP	[5]	857	LTP	[14,13,15,18,8]
PGFRB_HUMAN	INTRA	1001	1018	SH2	LTP	[5]	1009	LTP	[14,13,15,18]
PGFRB_HUMAN	NEAR	1001	1018	SH2	LTP	[5]	1021	LTP	[14,13,15,18]
PGFRB_HUMAN	INTRA	1013	1030	SH2	LTP	[5]	1021	LTP	[14,13,15,18]
PGFRB_HUMAN	NEAR	1013	1030	SH2	LTP	[5]	1009	LTP	[14,13,15,18]
PILRA_HUMAN	INTRA	261	278	SH2	LTP	[5]	269	LTP	[15]
PKD1_HUMAN	NEAR	4264	4277	SH3	HTP	[1]	4252	LTP	[15]
PKD1_HUMAN	NEAR	4264	4277	SH3	HTP	[1]	4288	HTP	[13,8]
PKN2_HUMAN	NEAR	974	984	PDZ	LTP	[3]	958	LTP	[14,13,17,15,16,8]
PLCG1_HUMAN	INTRA	763	780	SH2	HTP	[5]	775	mHTP	[14,13,15,8]
PLCG1_HUMAN	INTRA	763	780	SH2	HTP	[5]	771	LTP	[14,13,17,15,8]
PLCG1_HUMAN	NEAR	763	780	SH2	HTP	[5]	783	LTP	[14,13,15,8]
PLCG1_HUMAN	INTRA	775	792	SH2	HTP	[5]	775	mHTP	[14,13,15,8]
PLCG1_HUMAN	INTRA	775	792	SH2	HTP	[5]	783	LTP	[14,13,15,8]
PLCG1_HUMAN	NEAR	775	792	SH2	HTP	[5]	771	LTP	[14,13,17,15,8]
PLCG2_HUMAN	NEAR	763	776	SH3	HTP	[1]	743	LTP	[14]
PLCG2_HUMAN	NEAR	763	776	SH3	HTP	[1]	753	LTP	[14,13,15,8]
PLCG2_HUMAN	NEAR	763	776	SH3	HTP	[1]	759	LTP	[14,13,15,8]
PLCG2_HUMAN	NEAR	763	776	SH3	HTP	[1]	780	HTP	[15]
PPR1A_HUMAN	INTRA	27	44	WW	HTP	[5]	35	LTP	[14,13,15,8]
PPR1B_HUMAN	INTRA	67	84	WW	HTP	[5]	75	LTP	[14,13,15,18,8]
PPR1B_HUMAN	NEAR	67	84	WW	HTP	[5]	102	LTP	[13,8]
PPR1B_HUMAN	INTRA	67	84	WW	HTP	[5]	74	HTP	[15]
PPR3D_HUMAN	INTRA	70	82	SH3	HTP	[1]	74	mHTP	[14,15,8]
PPR3D_HUMAN	INTRA	70	82	SH3	HTP	[1]	77	HTP	[15,8]
PPR3D_HUMAN	INTRA	70	82	SH3	HTP	[1]	78	HTP	[14,15,8]
PRIC3_HUMAN	NEAR	348	361	SH3	HTP	[1]	367	HTP	[15]
PRIC3_HUMAN	NEAR	348	361	SH3	HTP	[1]	370	HTP	[15]
PRIC3_HUMAN	NEAR	348	361	SH3	HTP	[1]	378	HTP	[15]
PRIC3_HUMAN	INTRA	501	514	SH3	HTP	[1]	502	mHTP	[14,13,17,15,16,8]
PRLR_HUMAN	NEAR	342	345	SH2	LTP	[4]	349	LTP	[14,15]
PTEN_HUMAN	INTRA	393	403	PDZ	LTP	[3]	401	LTP	[8]
PTEN_HUMAN	NEAR	393	403	PDZ	LTP	[3]	380	LTP	[14,13,15,18]
PTEN_HUMAN	NEAR	393	403	PDZ	LTP	[3]	382	LTP	[14,13,15,18]
PTEN_HUMAN	NEAR	393	403	PDZ	LTP	[3]	383	LTP	[14,13,15,18]
PTEN_HUMAN	NEAR	393	403	PDZ	LTP	[3]	385	LTP	[14,13,15,18,8]
PTK6_HUMAN	INTRA	439	451	SH2	LTP	[5]	447	LTP	[14,13,15,8]
PTK6_HUMAN	INTRA	439	451	SH2	LTP	[5]	446	HTP	[17,15]
PTN11_HUMAN	NEAR	271	288	SH2	LTP	[5]	304	LTP	[14,15]
PTN11_HUMAN	INTRA	271	288	SH2	LTP	[5]	279	HTP	[15]
PTN11_HUMAN	INTRA	296	313	SH2	HTP	[5]	304	LTP	[14,15]
PTN11_HUMAN	NEAR	296	313	SH2	HTP	[5]	327	LTP	[15]
PTN11_HUMAN	NEAR	296	313	SH2	HTP	[5]	279	HTP	[15]
PTN11_HUMAN	INTRA	534	551	SH2	LTP	[5]	546	LTP	[14,15,8]
PTN11_HUMAN	INTRA	534	551	SH2	LTP	[5]	547	HTP	[15]
PTN11_HUMAN	INTRA	534	551	SH2	LTP	[5]	551	HTP	[19]
PTN11_HUMAN	NEAR	534	551	SH2	LTP	[5]	552	HTP	[15]
PTN11_HUMAN	NEAR	534	551	SH2	LTP	[5]	557	HTP	[19]
PTN11_HUMAN	NEAR	534	551	SH2	LTP	[5]	562	HTP	[19,8]
PTN11_HUMAN	INTRA	546	549	SH2	LTP	[4]	546	LTP	[14,15,8]
PTN11_HUMAN	INTRA	546	549	SH2	LTP	[4]	547	HTP	[15]
PTN11_HUMAN	NEAR	546	549	SH2	LTP	[4]	551	HTP	[19]
PTN11_HUMAN	NEAR	546	549	SH2	LTP	[4]	552	HTP	[15]
PTN11_HUMAN	NEAR	546	549	SH2	LTP	[4]	557	HTP	[19]
PTN11_HUMAN	NEAR	546	549	SH2	LTP	[4]	562	HTP	[19,8]
PTN11_HUMAN	INTRA	576	593	SH2	LTP	[5]	580	LTP	[15]
PTN11_HUMAN	INTRA	576	593	SH2	LTP	[5]	584	LTP	[14,15,8]
PTN11_HUMAN	NEAR	576	593	SH2	LTP	[5]	595	LTP	[15,8]
PTN11_HUMAN	NEAR	576	593	SH2	LTP	[5]	557	HTP	[19]
PTN11_HUMAN	NEAR	576	593	SH2	LTP	[5]	562	HTP	[19,8]
PTN13_HUMAN	NEAR	1532	1544	SH3	HTP	[1]	1514	HTP	[15]
PTN18_HUMAN	INTRA	273	290	SH2	LTP	[5]	281	LTP	[13,15]
PTN18_HUMAN	NEAR	273	290	SH2	LTP	[5]	303	LTP	[13,15]
PTN18_HUMAN	INTRA	295	312	SH2	LTP	[5]	303	LTP	[13,15]
PTN18_HUMAN	NEAR	295	312	SH2	LTP	[5]	281	LTP	[13,15]
PTN18_HUMAN	NEAR	295	312	SH2	LTP	[5]	322	HTP	[15]
PTN18_HUMAN	INTRA	346	363	SH2	LTP	[5]	354	LTP	[13]
PTN18_HUMAN	NEAR	346	363	SH2	LTP	[5]	345	HTP	[15]
PTN18_HUMAN	NEAR	346	363	SH2	LTP	[5]	370	HTP	[15]
PTN18_HUMAN	INTRA	381	398	SH2	LTP	[5]	389	mHTP	[13,8]
PTN18_HUMAN	NEAR	381	398	SH2	LTP	[5]	370	HTP	[15]
PTN6_HUMAN	NEAR	268	285	SH2	LTP	[5]	301	HTP	[15]
PTN6_HUMAN	INTRA	528	545	SH2	HTP	[5]	536	LTP	[14,13,15,18,8]
PTN6_HUMAN	NEAR	528	545	SH2	HTP	[5]	564	LTP	[14,15,18,8]
PTN6_HUMAN	INTRA	528	545	SH2	HTP	[5]	541	HTP	[15]
PTN6_HUMAN	NEAR	528	545	SH2	HTP	[5]	509	HTP	[15,8]
PTN6_HUMAN	INTRA	556	573	SH2	LTP	[5]	564	LTP	[14,15,18,8]
PTN6_HUMAN	NEAR	556	573	SH2	LTP	[5]	536	LTP	[14,13,15,18,8]
PTN6_HUMAN	NEAR	556	573	SH2	LTP	[5]	591	LTP	[14,15]
PTN6_HUMAN	NEAR	556	573	SH2	LTP	[5]	541	HTP	[15]
PTPRA_HUMAN	INTRA	790	802	SH2	LTP	[5]	798	LTP	[14,13,15,18,8]
PTPRA_HUMAN	INTRA	790	802	SH2	LTP	[5]	791	HTP	[15]
PTPRE_HUMAN	INTRA	688	700	SH2	LTP	[5]	696	LTP	[13,15,8]
PTTG1_HUMAN	INTRA	163	173	SH3	LTP	[8]	165	LTP	[14,13,15,18,8]
PTTG1_HUMAN	NEAR	163	173	SH3	LTP	[8]	181	HTP	[17]
PTTG1_HUMAN	NEAR	163	173	SH3	LTP	[8]	184	HTP	[17]
PVRL2_HUMAN	NEAR	528	538	PDZ	LTP	[3]	520	HTP	[8]
RAD51_HUMAN	INTRA	315	321	SH3	LTP	[4]	315	LTP	[14,13,15]
RAD51_HUMAN	NEAR	315	321	SH3	LTP	[4]	309	LTP	[14,13,15,8]
RASA1_HUMAN	INTRA	452	469	SH2	LTP	[5]	460	LTP	[14,13,18]
RB_HUMAN	INTRA	365	382	WW	HTP	[5]	373	LTP	[14,13,15,19,18,8]
RB_HUMAN	NEAR	365	382	WW	HTP	[5]	356	LTP	[13,15,19,8]
RB_HUMAN	NEAR	365	382	WW	HTP	[5]	350	HTP	[19]
RB_HUMAN	NEAR	365	382	WW	HTP	[5]	353	HTP	[15,19]
RB_HUMAN	NEAR	365	382	WW	HTP	[5]	360	HTP	[15]
RBL2_HUMAN	INTRA	393	410	WW	HTP	[5]	401	LTP	[14,13,15,18,20,8]
RBL2_HUMAN	NEAR	393	410	WW	HTP	[5]	413	LTP	[14,13,15,18,8]
RBL2_HUMAN	NEAR	393	410	WW	HTP	[5]	417	LTP	[14,13,15,18,8]
RET_HUMAN	INTRA	920	937	SH2	LTP	[5]	928	LTP	[15]
RET_HUMAN	NEAR	920	937	SH2	LTP	[5]	900	LTP	[14,13,8]
RET_HUMAN	NEAR	920	937	SH2	LTP	[5]	905	LTP	[14,13,15,18,8]
RET_HUMAN	NEAR	920	937	SH2	LTP	[5]	952	LTP	[15]
RET_HUMAN	INTRA	973	990	SH2	LTP	[5]	981	LTP	[14,13,15,8]
RET_HUMAN	INTRA	1007	1024	SH2	LTP	[5]	1015	LTP	[14,13,15,8]
RET_HUMAN	NEAR	1007	1024	SH2	LTP	[5]	1029	LTP	[14,13,15]
RET_HUMAN	INTRA	1054	1071	SH2	LTP	[5]	1062	LTP	[14,13,15,18,8]
RET_HUMAN	NEAR	1054	1071	SH2	LTP	[5]	1090	LTP	[14,13,8]
RET_HUMAN	INTRA	1082	1099	SH2	LTP	[5]	1090	LTP	[14,13,8]
RET_HUMAN	INTRA	1082	1099	SH2	LTP	[5]	1096	LTP	[14,13,15,18,8]
RET_HUMAN	NEAR	1082	1099	SH2	LTP	[5]	1062	LTP	[14,13,15,18,8]
RET_HUMAN	INTRA	1088	1105	SH2	LTP	[5]	1090	LTP	[14,13,8]
RET_HUMAN	INTRA	1088	1105	SH2	LTP	[5]	1096	LTP	[14,13,15,18,8]
RL13_HUMAN	NEAR	126	139	SH3	HTP	[1]	106	mHTP	[17,8]
RL13_HUMAN	INTRA	126	139	SH3	HTP	[1]	132	HTP	[13]
RL13_HUMAN	NEAR	148	161	SH3	HTP	[1]	132	HTP	[13]
RON_HUMAN	INTRA	1345	1362	SH2	LTP	[5]	1353	LTP	[14,13,15,8]
RON_HUMAN	INTRA	1345	1362	SH2	LTP	[5]	1360	LTP	[14,13,15,8]
RON_HUMAN	INTRA	1352	1369	SH2	LTP	[5]	1353	LTP	[14,13,15,8]
RON_HUMAN	INTRA	1352	1369	SH2	LTP	[5]	1360	LTP	[14,13,15,8]
ROS_HUMAN	INTRA	2266	2283	SH2	LTP	[5]	2274	LTP	[14,15]
ROS_HUMAN	INTRA	2326	2343	SH2	LTP	[5]	2334	LTP	[14,15]
ROS_HUMAN	INTRA	2326	2343	SH2	LTP	[5]	2342	HTP	[15]
ROS_HUMAN	NEAR	2326	2343	SH2	LTP	[5]	2323	HTP	[15]
RPGF6_HUMAN	NEAR	1597	1601	PDZ	LTP	[2]	1590	mHTP	[17,15,8]
RPP38_HUMAN	INTRA	1	14	SH3	HTP	[1]	12	HTP	[17]
RRAS_HUMAN	INTRA	199	212	SH3	HTP	[1]	201	HTP	[17]
RTKN_HUMAN	NEAR	553	563	PDZ	LTP	[3]	543	HTP	[15,8]
RTN4_HUMAN	INTRA	169	182	SH3	HTP	[1]	182	mHTP	[17,15,16,8]
RTN4_HUMAN	NEAR	169	182	SH3	HTP	[1]	184	mHTP	[13,17,15,16,8]
RTN4_HUMAN	NEAR	169	182	SH3	HTP	[1]	188	mHTP	[13,17,15,16,8]
RTN4_HUMAN	INTRA	169	182	SH3	HTP	[1]	181	HTP	[13,17,15,16,8]
RTN4_HUMAN	NEAR	169	182	SH3	HTP	[1]	196	HTP	[13,16]
SCG2_HUMAN	NEAR	564	576	SH3	HTP	[1]	596	HTP	[15]
SCNNA_HUMAN	NEAR	632	648	WW	LTP	[5]	663	LTP	[14,15]
SCNNB_HUMAN	INTRA	608	624	WW	LTP	[5]	615	LTP	[15]
SCNNG_HUMAN	INTRA	615	631	WW	LTP	[5]	622	LTP	[13]
SDC1_HUMAN	INTRA	300	310	PDZ	LTP	[3]	309	LTP	[13,15,8]
SDC1_HUMAN	NEAR	300	310	PDZ	LTP	[3]	286	LTP	[15]
SDC1_HUMAN	NEAR	300	310	PDZ	LTP	[3]	299	LTP	[15]
SDC2_HUMAN	NEAR	191	201	PDZ	LTP	[3]	179	LTP	[15]
SDC2_HUMAN	NEAR	191	201	PDZ	LTP	[3]	187	LTP	[14,13,18]
SDC2_HUMAN	NEAR	191	201	PDZ	LTP	[3]	188	LTP	[14,13,18]
SDC3_HUMAN	INTRA	432	442	PDZ	LTP	[3]	441	LTP	[14,8]
SDC3_HUMAN	NEAR	432	442	PDZ	LTP	[3]	419	LTP	[14,13]
SDC3_HUMAN	NEAR	432	442	PDZ	LTP	[3]	431	LTP	[14,13]
SDC4_HUMAN	INTRA	188	198	PDZ	LTP	[3]	197	mHTP	[13,15,8]
SDC4_HUMAN	NEAR	188	198	PDZ	LTP	[3]	179	LTP	[14,13,15]
SGK1_HUMAN	INTRA	421	431	PDZ	LTP	[3]	422	LTP	[14,13,15,8]
SGK1_HUMAN	NEAR	421	431	PDZ	LTP	[3]	401	HTP	[15,8]
SHC1_HUMAN	INTRA	349	352	SH2	LTP	[5]	349	LTP	[14,13,15,18,8]
SHC1_HUMAN	INTRA	349	352	SH2	LTP	[5]	350	LTP	[14,13,15,8]
SHC1_HUMAN	INTRA	427	430	SH2	LTP	[5]	427	LTP	[14,13,15,18,8]
SHC1_HUMAN	NEAR	427	430	SH2	LTP	[5]	426	HTP	[15]
SHIP2_HUMAN	NEAR	944	949	SH3	LTP	[8]	958	LTP	[8]
SHPS1_HUMAN	INTRA	421	438	SH2	LTP	[5]	428	LTP	[15,8]
SHPS1_HUMAN	NEAR	421	438	SH2	LTP	[5]	452	LTP	[15,8]
SHPS1_HUMAN	INTRA	445	462	SH2	LTP	[5]	452	LTP	[15,8]
SHPS1_HUMAN	NEAR	445	462	SH2	LTP	[5]	428	LTP	[15,8]
SHPS1_HUMAN	NEAR	445	462	SH2	LTP	[5]	469	LTP	[15,8]
SHPS1_HUMAN	INTRA	462	479	SH2	LTP	[5]	469	LTP	[15,8]
SHPS1_HUMAN	NEAR	462	479	SH2	LTP	[5]	452	LTP	[15,8]
SHPS1_HUMAN	NEAR	462	479	SH2	LTP	[5]	495	LTP	[15,8]
SHPS1_HUMAN	INTRA	488	503	SH2	LTP	[5]	495	LTP	[15,8]
SHPS1_HUMAN	NEAR	488	503	SH2	LTP	[5]	469	LTP	[15,8]
SIG10_HUMAN	INTRA	659	676	SH2	LTP	[5]	667	LTP	[14,15,8]
SIG10_HUMAN	NEAR	659	676	SH2	LTP	[5]	691	LTP	[14,15]
SIT1_HUMAN	NEAR	82	99	SH2	LTP	[5]	102	mHTP	[14,13,15,18,8]
SIT1_HUMAN	INTRA	82	99	SH2	LTP	[5]	83	LTP	[14,13,15,18,8]
SIT1_HUMAN	INTRA	82	99	SH2	LTP	[5]	90	LTP	[14,13,15,8]
SIT1_HUMAN	INTRA	82	99	SH2	LTP	[5]	95	HTP	[14,13,15,8]
SIT1_HUMAN	INTRA	82	99	SH2	LTP	[5]	98	HTP	[14,13,15,18,8]
SIT1_HUMAN	NEAR	82	99	SH2	LTP	[5]	80	HTP	[14,13,15,8]
SIT1_HUMAN	INTRA	140	157	SH2	LTP	[5]	144	mHTP	[14,13,15,18,8]
SIT1_HUMAN	INTRA	140	157	SH2	LTP	[5]	148	LTP	[14,13,15,8]
SIT1_HUMAN	NEAR	140	157	SH2	LTP	[5]	127	LTP	[14,13,8]
SIT1_HUMAN	NEAR	140	157	SH2	LTP	[5]	169	LTP	[14,13,8]
SIT1_HUMAN	INTRA	140	157	SH2	LTP	[5]	149	HTP	[14,13,15,18,8]
SIT1_HUMAN	NEAR	161	178	SH2	LTP	[5]	144	mHTP	[14,13,15,18,8]
SIT1_HUMAN	NEAR	161	178	SH2	LTP	[5]	182	mHTP	[14,13,15,18,8]
SIT1_HUMAN	INTRA	161	178	SH2	LTP	[5]	169	LTP	[14,13,8]
SIT1_HUMAN	NEAR	161	178	SH2	LTP	[5]	148	LTP	[14,13,15,8]
SIT1_HUMAN	NEAR	161	178	SH2	LTP	[5]	188	LTP	[14,13,15,8]
SIT1_HUMAN	NEAR	161	178	SH2	LTP	[5]	149	HTP	[14,13,15,18,8]
SIT1_HUMAN	INTRA	180	196	SH2	LTP	[5]	182	mHTP	[14,13,15,18,8]
SIT1_HUMAN	INTRA	180	196	SH2	LTP	[5]	188	LTP	[14,13,15,8]
SIT1_HUMAN	NEAR	180	196	SH2	LTP	[5]	169	LTP	[14,13,8]
SKAP1_HUMAN	INTRA	263	280	SH2	LTP	[5]	271	LTP	[14,15,8]
SKAP1_HUMAN	NEAR	263	280	SH2	LTP	[5]	295	LTP	[15,8]
SKAP1_HUMAN	NEAR	263	280	SH2	LTP	[5]	298	LTP	[15]
SKAP1_HUMAN	INTRA	288	300	SH3	LTP	[1]	295	LTP	[15,8]
SKAP1_HUMAN	INTRA	288	300	SH3	LTP	[1]	298	LTP	[15]
SKAP1_HUMAN	NEAR	288	300	SH3	LTP	[1]	271	LTP	[14,15,8]
SLAF1_HUMAN	INTRA	246	286	SH2	HTP	[5]	281	LTP	[14,13,15,8]
SLAF1_HUMAN	INTRA	276	286	SH2	LTP	[5]	281	LTP	[14,13,15,8]
SLAF1_HUMAN	INTRA	299	316	SH2	HTP	[5]	307	LTP	[14,13,15]
SLAF1_HUMAN	NEAR	299	316	SH2	HTP	[5]	281	LTP	[14,13,15,8]
SLAF1_HUMAN	NEAR	299	316	SH2	HTP	[5]	327	LTP	[14,13,15]
SLAF1_HUMAN	INTRA	319	335	SH2	LTP	[5]	327	LTP	[14,13,15]
SLAF1_HUMAN	NEAR	319	335	SH2	LTP	[5]	307	LTP	[14,13,15]
SMAD1_HUMAN	NEAR	216	232	WW	LTP	[5]	206	LTP	[14,13,15]
SMAD1_HUMAN	NEAR	216	232	WW	LTP	[5]	214	LTP	[14,13,15]
SMAD3_HUMAN	INTRA	172	188	WW	LTP	[5]	179	LTP	[14,13,15]
SMAD3_HUMAN	NEAR	172	188	WW	LTP	[5]	204	LTP	[14,13,15]
SMAD3_HUMAN	NEAR	172	188	WW	LTP	[5]	208	LTP	[14,13,15]
SNCAP_HUMAN	INTRA	203	224	WW	LTP	[5]	211	LTP	[15]
SNCAP_HUMAN	INTRA	203	224	WW	LTP	[5]	215	LTP	[15]
SNX12_HUMAN	NEAR	87	100	SH3	HTP	[1]	73	mHTP	[14,13,17,15,16,8]
SNX3_HUMAN	NEAR	85	98	SH3	HTP	[1]	72	mHTP	[14,13,17,8]
SNX3_HUMAN	NEAR	85	98	SH3	HTP	[1]	71	HTP	[17]
SOCS3_HUMAN	INTRA	213	225	SH2	HTP	[5]	221	LTP	[14,15]
SOCS3_HUMAN	NEAR	213	225	SH2	HTP	[5]	204	LTP	[14,15]
SOS1_HUMAN	NEAR	1019	1031	SH3	HTP	[1]	1043	LTP	[14,15,16,8]
SOS1_HUMAN	NEAR	1019	1031	SH3	HTP	[1]	1033	HTP	[16]
SOS1_HUMAN	NEAR	1147	1161	SH3	LTP	[1]	1132	LTP	[14,13,15]
SOS1_HUMAN	NEAR	1147	1161	SH3	LTP	[1]	1167	LTP	[14,13,15]
SOS1_HUMAN	NEAR	1147	1161	SH3	LTP	[1]	1178	LTP	[14,13,15]
SOS1_HUMAN	NEAR	1147	1161	SH3	LTP	[1]	1134	HTP	[15,8]
SOS1_HUMAN	NEAR	1147	1161	SH3	LTP	[1]	1137	HTP	[15,8]
SOS1_HUMAN	INTRA	1177	1188	SH3	LTP	[1]	1178	LTP	[14,13,15]
SOS1_HUMAN	NEAR	1177	1188	SH3	LTP	[1]	1167	LTP	[14,13,15]
SOS1_HUMAN	NEAR	1177	1188	SH3	LTP	[1]	1193	LTP	[14,13,15]
SOS1_HUMAN	NEAR	1177	1188	SH3	LTP	[1]	1197	LTP	[14,13,15]
SOS1_HUMAN	NEAR	1209	1220	SH3	LTP	[1]	1193	LTP	[14,13,15]
SOS1_HUMAN	NEAR	1209	1220	SH3	LTP	[1]	1197	LTP	[14,13,15]
SOS1_HUMAN	INTRA	1209	1220	SH3	LTP	[1]	1210	HTP	[14,13,15,18,8]
SOS1_HUMAN	NEAR	1287	1298	SH3	LTP	[1]	1275	HTP	[17]
SP1_HUMAN	NEAR	685	698	SH3	HTP	[1]	668	LTP	[15,8]
SP1_HUMAN	NEAR	685	698	SH3	HTP	[1]	670	LTP	[15,8]
SP1_HUMAN	NEAR	685	698	SH3	HTP	[1]	681	LTP	[15,8]
SP1_HUMAN	NEAR	685	698	SH3	HTP	[1]	702	LTP	[8]
SPRE2_HUMAN	INTRA	220	237	SH2	LTP	[5]	228	LTP	[15,8]
SPRE2_HUMAN	INTRA	220	237	SH2	LTP	[5]	231	LTP	[15,8]
SPRE2_HUMAN	NEAR	220	237	SH2	LTP	[5]	206	HTP	[15]
SPRE2_HUMAN	NEAR	220	237	SH2	LTP	[5]	251	HTP	[15]
SPRE2_HUMAN	INTRA	223	240	SH2	LTP	[5]	228	LTP	[15,8]
SPRE2_HUMAN	INTRA	223	240	SH2	LTP	[5]	231	LTP	[15,8]
SPRE2_HUMAN	NEAR	223	240	SH2	LTP	[5]	206	HTP	[15]
SPRE2_HUMAN	NEAR	223	240	SH2	LTP	[5]	251	HTP	[15]
SPY2_HUMAN	INTRA	47	64	SH2	LTP	[5]	55	LTP	[14,15]
SPY2_HUMAN	NEAR	47	64	SH2	LTP	[5]	42	LTP	[15]
SPY2_HUMAN	NEAR	47	64	SH2	LTP	[5]	75	LTP	[14,15]
SPY2_HUMAN	INTRA	47	64	SH2	LTP	[5]	56	HTP	[15]
SRC_HUMAN	INTRA	321	338	SH2	LTP	[5]	338	LTP	[14]
SRC_HUMAN	INTRA	411	428	SH2	HTP	[5]	419	LTP	[14,13,8]
SRC_HUMAN	NEAR	411	428	SH2	HTP	[5]	439	HTP	[8]
SRC_HUMAN	INTRA	522	536	SH2	LTP	[5]	530	LTP	[14,13,8]
SRC_HUMAN	INTRA	530	533	SH2	LTP	[4]	530	LTP	[14,13,8]
SRC_HUMAN	INTRA	530	536	PDZ	LTP	[10]	530	LTP	[14,13,8]
SSR2_HUMAN	INTRA	63	80	SH2	LTP	[5]	71	LTP	[15]
STA5A_HUMAN	INTRA	686	703	SH2	HTP	[5]	694	LTP	[14,13,17,15,16,8]
STAT1_HUMAN	INTRA	693	710	SH2	LTP	[5]	701	LTP	[14,13,15,8]
STAT1_HUMAN	NEAR	693	710	SH2	LTP	[5]	727	LTP	[14,13,17,15,18,8]
STAT1_HUMAN	INTRA	719	736	WW	HTP	[5]	727	LTP	[14,13,17,15,18,8]
STAT1_HUMAN	NEAR	719	736	WW	HTP	[5]	701	LTP	[14,13,15,8]
STAT2_HUMAN	INTRA	682	699	SH2	HTP	[5]	690	LTP	[14,13,15,8]
STAT3_HUMAN	INTRA	697	714	SH2	LTP	[5]	714	mHTP	[15,8]
STAT3_HUMAN	INTRA	697	714	SH2	LTP	[5]	705	LTP	[14,13,15,19,8]
STAT3_HUMAN	NEAR	697	714	SH2	LTP	[5]	727	LTP	[14,13,17,15,19,8]
STAT3_HUMAN	NEAR	697	714	SH2	LTP	[5]	686	HTP	[15]
STAT3_HUMAN	NEAR	697	714	SH2	LTP	[5]	691	HTP	[13,15,8]
STAT3_HUMAN	NEAR	697	714	SH2	LTP	[5]	717	HTP	[15]
STAT3_HUMAN	NEAR	697	714	SH2	LTP	[5]	719	HTP	[19]
STF1_HUMAN	NEAR	182	195	SH3	HTP	[1]	203	LTP	[14,13,15,18,8]
SUV92_HUMAN	NEAR	233	246	SH3	HTP	[1]	251	HTP	[17]
SYDC_HUMAN	NEAR	327	339	SH3	HTP	[1]	323	HTP	[17]
SYNJ1_HUMAN	NEAR	1063	1070	SH3	LTP	[1]	1048	HTP	[13,17,8]
SYNJ1_HUMAN	NEAR	1063	1070	SH3	LTP	[1]	1049	HTP	[13]
SYNJ1_HUMAN	NEAR	1063	1070	SH3	LTP	[1]	1053	HTP	[17,8]
SYNJ1_HUMAN	NEAR	1063	1070	SH3	LTP	[1]	1080	HTP	[15]
SYNJ1_HUMAN	NEAR	1063	1070	SH3	LTP	[1]	1083	HTP	[15]
SYNJ1_HUMAN	NEAR	1100	1112	SH3	HTP	[1]	1080	HTP	[15]
SYNJ1_HUMAN	NEAR	1100	1112	SH3	HTP	[1]	1083	HTP	[15]
TAL1_HUMAN	NEAR	125	138	SH3	HTP	[1]	122	LTP	[14,13,15,18,8]
TAU_HUMAN	INTRA	545	550	WW	LTP	[2]	548	LTP	[14,13,16,8]
TAU_HUMAN	NEAR	545	550	WW	LTP	[2]	525	LTP	[13]
TAU_HUMAN	NEAR	545	550	WW	LTP	[2]	529	LTP	[14,13,8]
TAU_HUMAN	NEAR	545	550	WW	LTP	[2]	531	LTP	[14,13,8]
TAU_HUMAN	NEAR	545	550	WW	LTP	[2]	534	LTP	[14,13,8]
TAU_HUMAN	NEAR	545	550	WW	LTP	[2]	552	LTP	[14,13,16,8]
TAU_HUMAN	NEAR	545	550	WW	LTP	[2]	554	LTP	[13,8]
TAU_HUMAN	NEAR	545	550	WW	LTP	[2]	555	LTP	[13]
TAU_HUMAN	NEAR	545	550	WW	LTP	[2]	527	HTP	[13]
TAU_HUMAN	INTRA	547	553	SH3	LTP	[4]	548	LTP	[14,13,16,8]
TAU_HUMAN	INTRA	547	553	SH3	LTP	[4]	552	LTP	[14,13,16,8]
TAU_HUMAN	NEAR	547	553	SH3	LTP	[4]	529	LTP	[14,13,8]
TAU_HUMAN	NEAR	547	553	SH3	LTP	[4]	531	LTP	[14,13,8]
TAU_HUMAN	NEAR	547	553	SH3	LTP	[4]	534	LTP	[14,13,8]
TAU_HUMAN	NEAR	547	553	SH3	LTP	[4]	554	LTP	[13,8]
TAU_HUMAN	NEAR	547	553	SH3	LTP	[4]	555	LTP	[13]
TAU_HUMAN	NEAR	547	553	SH3	LTP	[4]	527	HTP	[13]
TB10A_HUMAN	INTRA	498	508	PDZ	LTP	[3]	503	HTP	[8]
TDRD1_HUMAN	INTRA	183	195	SH3	HTP	[1]	187	HTP	[16]
TDRD1_HUMAN	NEAR	183	195	SH3	HTP	[1]	178	HTP	[16]
TDRD1_HUMAN	NEAR	183	195	SH3	HTP	[1]	182	HTP	[16]
TERA_HUMAN	INTRA	797	806	SH2	LTP	[5]	805	mHTP	[14,13,8]
TERA_HUMAN	NEAR	797	806	SH2	LTP	[5]	784	LTP	[14,13,17,8]
TERA_HUMAN	NEAR	797	806	SH2	LTP	[5]	787	HTP	[8]
TF65_HUMAN	INTRA	303	332	SH3	LTP	[1]	311	LTP	[14,13,15,8]
TIE2_HUMAN	INTRA	889	906	SH2	HTP	[5]	897	LTP	[14,13]
TIE2_HUMAN	NEAR	1004	1021	SH2	HTP	[5]	992	LTP	[14,13,15,8]
TIE2_HUMAN	NEAR	1016	1033	SH2	HTP	[5]	1048	LTP	[14,13,18]
TIE2_HUMAN	INTRA	1031	1048	SH2	HTP	[5]	1048	LTP	[14,13,18]
TIE2_HUMAN	NEAR	1060	1077	SH2	HTP	[5]	1048	LTP	[14,13,18]
TIE2_HUMAN	INTRA	1093	1110	SH2	LTP	[5]	1102	LTP	[14,13,15]
TIE2_HUMAN	INTRA	1093	1110	SH2	LTP	[5]	1108	LTP	[14,13,15]
TIE2_HUMAN	NEAR	1093	1110	SH2	LTP	[5]	1113	LTP	[14]
TIE2_HUMAN	NEAR	1093	1110	SH2	LTP	[5]	1119	LTP	[13]
TIE2_HUMAN	INTRA	1100	1117	SH2	HTP	[5]	1102	LTP	[14,13,15]
TIE2_HUMAN	INTRA	1100	1117	SH2	HTP	[5]	1108	LTP	[14,13,15]
TIE2_HUMAN	INTRA	1100	1117	SH2	HTP	[5]	1113	LTP	[14]
TIE2_HUMAN	NEAR	1100	1117	SH2	HTP	[5]	1119	LTP	[13]
TLE1_HUMAN	INTRA	259	276	WW	HTP	[5]	259	LTP	[8]
TLE1_HUMAN	INTRA	259	276	WW	HTP	[5]	263	LTP	[8]
TLE1_HUMAN	INTRA	259	276	WW	HTP	[5]	267	LTP	[8]
TLE1_HUMAN	NEAR	259	276	WW	HTP	[5]	239	LTP	[14,15,8]
TLE1_HUMAN	NEAR	259	276	WW	HTP	[5]	286	HTP	[15,8]
TLE2_HUMAN	INTRA	245	262	WW	HTP	[5]	249	LTP	[8]
TLE2_HUMAN	INTRA	245	262	WW	HTP	[5]	253	LTP	[8]
TLE2_HUMAN	NEAR	245	262	WW	HTP	[5]	228	LTP	[8]
TLE2_HUMAN	NEAR	245	262	WW	HTP	[5]	271	HTP	[15,8]
TLE2_HUMAN	NEAR	245	262	WW	HTP	[5]	281	HTP	[15,8]
TNIK_HUMAN	INTRA	545	558	SH3	HTP	[1]	547	HTP	[15]
TNIK_HUMAN	NEAR	545	558	SH3	HTP	[1]	560	HTP	[15,20,8]
TNR6_HUMAN	INTRA	283	300	SH2	LTP	[5]	291	LTP	[15]
TOPK_HUMAN	NEAR	312	322	PDZ	LTP	[1]	310	HTP	[17]
TPBG_HUMAN	INTRA	410	420	PDZ	LTP	[3]	415	HTP	[17]
TPBG_HUMAN	INTRA	410	420	PDZ	LTP	[3]	418	HTP	[17]
TPOR_HUMAN	INTRA	631	634	SH2	LTP	[4]	631	LTP	[14,13]
TPOR_HUMAN	NEAR	631	634	SH2	LTP	[4]	626	LTP	[14,13]
TPX2_HUMAN	NEAR	633	646	SH3	HTP	[1]	652	mHTP	[14,13,15,8]
TPX2_HUMAN	INTRA	633	646	SH3	HTP	[1]	634	HTP	[13,15,8]
TPX2_HUMAN	INTRA	633	646	SH3	HTP	[1]	646	HTP	[17]
TPX2_HUMAN	NEAR	633	646	SH3	HTP	[1]	654	HTP	[14,13,15,8]
TRML1_HUMAN	INTRA	273	290	SH2	LTP	[5]	281	LTP	[13]
UFO_HUMAN	INTRA	771	788	SH2	LTP	[5]	779	LTP	[13]
UFO_HUMAN	INTRA	813	830	SH2	LTP	[5]	821	LTP	[13]
UFO_HUMAN	INTRA	858	875	SH2	LTP	[5]	866	LTP	[13]
UFO_HUMAN	INTRA	858	875	SH2	LTP	[5]	875	HTP	[8]
UFO_HUMAN	NEAR	858	875	SH2	LTP	[5]	884	HTP	[8]
US6NL_HUMAN	NEAR	725	729	SH3	LTP	[4]	716	mHTP	[14,15,8]
US6NL_HUMAN	INTRA	725	729	SH3	LTP	[4]	729	HTP	[14,15,8]
US6NL_HUMAN	NEAR	725	729	SH3	LTP	[4]	710	HTP	[14,15,8]
US6NL_HUMAN	NEAR	725	729	SH3	LTP	[4]	711	HTP	[15]
US6NL_HUMAN	NEAR	725	729	SH3	LTP	[4]	741	HTP	[15]
VAC14_HUMAN	INTRA	768	782	PDZ	HTP	[1]	770	HTP	[15,20]
VAV_HUMAN	INTRA	134	151	SH2	LTP	[5]	142	LTP	[14,13,15]
VAV_HUMAN	NEAR	134	151	SH2	LTP	[5]	160	LTP	[14,13,15]
VAV_HUMAN	INTRA	166	183	SH2	HTP	[5]	174	LTP	[14,13,15,18]
VAV_HUMAN	NEAR	166	183	SH2	HTP	[5]	160	LTP	[14,13,15]
VGFR1_HUMAN	INTRA	786	803	SH2	LTP	[5]	794	LTP	[14,13,15,18]
VGFR1_HUMAN	INTRA	1161	1178	SH2	LTP	[5]	1169	LTP	[14,13,15,18,8]
VGFR1_HUMAN	INTRA	1205	1222	SH2	LTP	[5]	1213	LTP	[14,13,15,8]
VGFR1_HUMAN	NEAR	1205	1222	SH2	LTP	[5]	1242	LTP	[14,13,15,18,8]
VGFR1_HUMAN	INTRA	1325	1338	SH2	LTP	[5]	1327	LTP	[14,13,8]
VGFR1_HUMAN	INTRA	1325	1338	SH2	LTP	[5]	1333	LTP	[14,13,15,8]
VGFR2_HUMAN	INTRA	793	810	SH2	LTP	[5]	801	LTP	[14,15]
VGFR2_HUMAN	INTRA	1167	1184	SH2	LTP	[5]	1175	LTP	[14,13,15,18,8]
WBP2_HUMAN	NEAR	240	256	WW	HTP	[5]	232	HTP	[14,13,15,8]
WIPF1_HUMAN	INTRA	328	341	SH3	HTP	[1]	340	mHTP	[17,19,8]
WIPF1_HUMAN	NEAR	328	341	SH3	HTP	[1]	350	mHTP	[17,15,8]
WIPF1_HUMAN	NEAR	328	341	SH3	HTP	[1]	343	HTP	[17]
WIPF1_HUMAN	NEAR	328	341	SH3	HTP	[1]	344	HTP	[15]
WIPF1_HUMAN	NEAR	328	341	SH3	HTP	[1]	345	HTP	[17,15,8]
XRCC1_HUMAN	INTRA	263	276	SH3	HTP	[1]	266	mHTP	[13,17,15,16,8]
XRCC1_HUMAN	INTRA	263	276	SH3	HTP	[1]	268	mHTP	[14,13,17,16]
XRCC1_HUMAN	NEAR	263	276	SH3	HTP	[1]	284	LTP	[15]
XRCC1_HUMAN	NEAR	263	276	SH3	HTP	[1]	257	HTP	[17,15,8]
XRCC1_HUMAN	NEAR	263	276	SH3	HTP	[1]	259	HTP	[17,15,8]
XRCC1_HUMAN	NEAR	263	276	SH3	HTP	[1]	279	HTP	[15]
ZAP70_HUMAN	INTRA	284	301	SH2	LTP	[5]	292	LTP	[14,13,15,8]
ZAP70_HUMAN	NEAR	284	301	SH2	LTP	[5]	315	LTP	[14,13,15,18,8]
ZAP70_HUMAN	NEAR	284	301	SH2	LTP	[5]	319	LTP	[14,13,15,18,8]
ZAP70_HUMAN	INTRA	284	301	SH2	LTP	[5]	289	HTP	[14,13,18,8]
ZAP70_HUMAN	INTRA	284	301	SH2	LTP	[5]	293	HTP	[13]
ZAP70_HUMAN	INTRA	307	324	SH2	LTP	[5]	315	LTP	[14,13,15,18,8]
ZAP70_HUMAN	INTRA	307	324	SH2	LTP	[5]	319	LTP	[14,13,15,18,8]
ZAP70_HUMAN	NEAR	307	324	SH2	LTP	[5]	292	LTP	[14,13,15,8]
ZAP70_HUMAN	NEAR	307	324	SH2	LTP	[5]	289	HTP	[14,13,18,8]
ZAP70_HUMAN	NEAR	307	324	SH2	LTP	[5]	293	HTP	[13]
ZBT16_HUMAN	INTRA	274	291	WW	HTP	[5]	282	LTP	[15,8]
ZBT16_HUMAN	NEAR	274	291	WW	HTP	[5]	256	LTP	[8]
ZO3_HUMAN	INTRA	923	933	PDZ	LTP	[3]	925	HTP	[15]
ZO3_HUMAN	NEAR	923	933	PDZ	LTP	[3]	919	HTP	[15,8]
ZO3_HUMAN	NEAR	923	933	PDZ	LTP	[3]	920	HTP	[15,8]
References
1	Ceol A, Chatr-aryamontri A, Santonico E, Sacco R, Castagnoli L, et al. (2007) DOMINO: a database of domain-peptide interactions. Nucleic Acids Res 35: D557-560.
2	Stein A, Panjkovich A, Aloy P (2009) 3did Update: domain-domain and peptide-mediated interactions of known 3D structure. Nucleic Acids Res 37: D300-304.
3	Beuming T, Skrabanek L, Niv MY, Mukherjee P, Weinstein H (2005) PDZBase: a protein-protein interaction database for PDZ-domains. Bioinformatics 21: 827-828.
4	Gould CM, Diella F, Via A, Puntervoll P, Gemund C, et al. (2010) ELM: the status of the 2010 eukaryotic linear motif resource. Nucleic Acids Res 38: D167-180.
5	Gong W, Zhou D, Ren Y, Wang Y, Zuo Z, et al. (2008) PepCyber:P~PEP: a database of human protein protein interactions mediated by phosphoprotein-binding domains. Nucleic Acids Res 36: D679-683.
6	Liu J, Liao Z, Camden J, Griffin KD, Garrad RC, et al. (2004) Src homology 3 binding sites in the P2Y2 nucleotide receptor interact with Src and regulate activities of Src, proline-rich tyrosine kinase 2, and growth factor receptors. J Biol Chem 279: 8212-8218.
7	Han B, Bai XH, Lodyga M, Xu J, Yang BB, et al. (2004) Conversion of mechanical force into biochemical signaling. J Biol Chem 279: 54793-54801.
8	Bairoch A, Apweiler R, Wu CH, Barker WC, Boeckmann B, et al. (2005) The Universal Protein Resource (UniProt). Nucleic Acids Res 33: D154-159.
9	Anggono V, Robinson PJ (2007) Syndapin I and endophilin I bind overlapping proline-rich regions of dynamin I: role in synaptic vesicle endocytosis. J Neurochem 102: 931-943.
10	Baumgartner M, Weiss A, Fritzius T, Heinrich J, Moelling K (2009) The PDZ protein MPP2 interacts with c-Src in epithelial cells. Exp Cell Res 315: 2888-2898.
11	Shukla U, Hatani T, Nakashima K, Ogi K, Sada K (2009) Tyrosine phosphorylation of 3BP2 regulates B cell receptor-mediated activation of NFAT. J Biol Chem 284: 33719-33728.
12	Weng Z, Thomas SM, Rickles RJ, Taylor JA, Brauer AW, et al. (1994) Identification of Src, Fyn, and Lyn SH3-binding proteins: implications for a function of SH3 domains. Mol Cell Biol 14: 4509-4521.
13	Keshava Prasad TS, Goel R, Kandasamy K, Keerthikumar S, Kumar S, et al. (2009) Human Protein Reference Database--2009 update. Nucleic Acids Res 37: D767-772.
14	Diella F, Gould CM, Chica C, Via A, Gibson TJ (2008) Phospho.ELM: a database of phosphorylation sites--update 2008. Nucleic Acids Res 36: D240-244.
15	Hornbeck PV, Chabra I, Kornhauser JM, Skrzypek E, Zhang B (2004) PhosphoSite: A bioinformatics resource dedicated to physiological protein phosphorylation. Proteomics 4: 1551-1561.
16	Kandasamy K, Keerthikumar S, Goel R, Mathivanan S, Patankar N, et al. (2009) Human Proteinpedia: a unified discovery resource for proteomics research. Nucleic Acids Res 37: D773-781.
17	Gnad F, Ren S, Cox J, Olsen JV, Macek B, et al. (2007) PHOSIDA (phosphorylation site database): management, structural and evolutionary investigation, and prediction of phosphosites. Genome Biol 8: R250.
18	Linding R, Jensen LJ, Ostheimer GJ, van Vugt MA, Jorgensen C, et al. (2007) Systematic discovery of in vivo phosphorylation networks. Cell 129: 1415-1426.
19	Old WM, Shabb JB, Houel S, Wang H, Couts KL, et al. (2009) Functional proteomics identifies targets of phosphorylation by B-Raf signaling in melanoma. Mol Cell 34: 115-131.
20	Oppermann FS, Gnad F, Olsen JV, Hornberger R, Greff Z, et al. (2009) Large-scale proteomics analysis of the human kinome. Mol Cell Proteomics 8: 1751-1764.
