# Supplementary material for: A Dynamic View of Domain-Motif Interactions
Source: PubMed Central journal article supplement (PMC3257277; doi:10.1371/journal.pcbi.1002341), 2012-01-12
Supplement: pcbi.1002341.s009.pdf [file pcbi.1002341.s009.pdf]

**Table S7:** Disorder levels of the various motifs

| <b>Domain type</b> | <b>#motifs</b> | <b>Total # of motif residues</b> | <b>Total # of motif residues that are disordered</b> | <b>Percent disordered residues (motifs)</b> | <b>Percent disordered residues (whole proteins)</b> | <b>Percent disordered residues (20 flanking residues)</b> |
|--------------------|----------------|----------------------------------|------------------------------------------------------|---------------------------------------------|-----------------------------------------------------|-----------------------------------------------------------|
| SH3                | 70             | 808                              | 662                                                  | 81.93%                                      | 31.63%                                              | 74.79%                                                    |
| PDZ                | 89             | 939                              | 662                                                  | 70.50%                                      | 18.61%                                              | 37.26%                                                    |
| WW                 | 62             | 1,703                            | 1044                                                 | 61.30%                                      | 32.66%                                              | 65.92%                                                    |
| SH2                | 330            | 5,419                            | 2,374                                                | 43.8%                                       | 21.07%                                              | 49.44%                                                    |

The disorder level of motifs was predicted by the IUPred algorithm [1]. To this end, we considered only motifs that were determined by low-throughput methods, and assumed that each residue that was assigned with disorder value above 0.5 is disordered. Note that the predicted disorder of the whole proteins (sixth column) is lower than the regions flanking the motifs (seventh column), and that the regions flanking the motifs are less disordered than the motifs themselves (fifth column). We used the motif disorder level as a threshold for finding randomly-positioned motifs.

1. Dosztanyi Z, Csizmek V, Tompa P, Simon I: IUPred: web server for the prediction of intrinsically unstructured regions of proteins based on estimated energy content. *Bioinformatics* 2005, 21(16):3433-3434.
