# Supplementary material for: A Dynamic View of Domain-Motif Interactions
Source: PLOS journal article supplement (doi:10.1371/journal.pcbi.1002341), 2012-01-12
Supplement: S7 (10.1371/journal.pcbi.1002341.s007) [file journal.pcbi.1002341.s007]

301 Moved Permanently

# Moved Permanently

The document has moved here.

---

Apache Server at www.ploscompbiol.org Port 80
