# Supplementary material for: A Dynamic View of Domain-Motif Interactions
Source: PLoS Comput Biol. 2012 Jan 12;8(1):e1002341. doi: 10.1371/journal.pcbi.1002341 (PMC3257277; doi:10.1371/journal.pcbi.1002341)
Supplement: Table S1 — Counts and statistical significance of the coupling between domain-motif interactions and phosphorylations. (PDF) [file pcbi.1002341.s003.pdf]

**Table S1:** Counts and statistical significance of the coupling between domain-motif interactions and phosphorylations

|     | Phosphorylation |     |          | motif-bound domains |          | Total number of motifs | # motifs that are only intra-phosphorylated | # motifs that are both intra- and near-phosphorylated | # motifs that are only near-phosphorylated | Total number of intra/near phosphorylation | Statistical significance    |                            |
|-----|-----------------|-----|----------|---------------------|----------|------------------------|---------------------------------------------|-------------------------------------------------------|--------------------------------------------|--------------------------------------------|-----------------------------|----------------------------|
|     | LTP             | HTP | LTP+ HTP | LTP                 | LTP+ HTP |                        |                                             |                                                       |                                            |                                            | Intra-motif phosphorylation | near-motif phosphorylation |
| PDZ |                 |     |          |                     |          | 89                     | 7                                           | 6                                                     | 9                                          | 22                                         | 0.0072                      | 0.0144                     |
|     |                 |     |          |                     |          | 89                     | 12                                          | 7                                                     | 15                                         | 34                                         | 0.0192                      | <0.0012                    |
|     |                 |     |          |                     |          | 95                     | 10                                          | 14                                                    | 14                                         | 38                                         | <0.0012                     | 0.0016                     |
| WW  |                 |     |          |                     |          | 62                     | 9                                           | 18                                                    | 8                                          | 35                                         | <0.0012                     | 0.012                      |
|     |                 |     |          |                     |          | 62                     | 7                                           | 7                                                     | 5                                          | 19                                         | NONE                        | NONE                       |
|     |                 |     |          |                     |          | 120                    | 16                                          | 45                                                    | 15                                         | 76                                         | <0.0012                     | NONE                       |
| SH3 |                 |     |          |                     |          | 70                     | 3                                           | 8                                                     | 22                                         | 33                                         | NONE                        | 0.0012                     |
|     |                 |     |          |                     |          | 70                     | 1                                           | 8                                                     | 21                                         | 30                                         | NONE                        | 0.0012                     |
|     |                 |     |          |                     |          | 378                    | 12                                          | 36                                                    | 73                                         | 121                                        | NONE                        | NONE                       |
| SH2 |                 |     |          |                     |          | 330                    | 132                                         | 139                                                   | 11                                         | 282                                        | <0.0012                     | 0.0012                     |
|     |                 |     |          |                     |          | 330                    | 76                                          | 94                                                    | 38                                         | 208                                        | <0.0012                     | <0.0012                    |
|     |                 |     |          |                     |          | 482                    | 137                                         | 270                                                   | 21                                         | 428                                        | 0.0048                      | <0.0012                    |

Several combinations of the domain-motif interaction data and the phosphorylation data are shown. The sources of integrated data are indicated by the black boxes on the left side of the table. For instance, the first line represents the integration of low-throughput phosphorylation data with low throughput PDZ domain interaction data. Abbreviations: LTP: low throughput methods; HTP: high throughput methods; LTP+HTP: evidence from high throughput or low throughput resource. The last two columns show the statistical significance of the coupling between motifs and phosphorylation events (see Methods in main text).
